# Supplementary material for: Aromatization of cyclic hydrocarbons via thioether elimination reaction
Source: Royal Society of Chemistry journal article supplement (doi:10.1039/d3cc03279e), 2023-01-01

## Aromatization of Cyclic Hydrocarbons via Thioether Elimination Reaction

Yang Liu, Yingqi Feng, Jinli Nie, Sijie Xie, Xin Pen, Huanliang Hong, Xiuwen Chen, Lu Chen, and Yibiao Li\*

School of Biotechnology and Health Sciences, Wuyi University, Jiangmen 529090, Guangdong, China

Correspondence and requests for materials should be addressed to email: [leeyib268@126.com](mailto:leeyib268@126.com) (Y.-B. Li)

### Table of Contents

|                                                                         |    |
|-------------------------------------------------------------------------|----|
| 1. General information .....                                            | 1  |
| 2. Synthesis of phenylcyclohexene derivatives.....                      | 1  |
| 3. General procedures for dehydrogenation reaction .....                | 2  |
| 4. Analytical data of all products .....                                | 5  |
| 5. <sup>1</sup> H NMR and <sup>13</sup> C NMR spectra for products..... | 19 |

## 1. General information

Chemicals and solvents were purchased from commercial suppliers and used as received unless noted. All products were purified by flash chromatography on silica gel. The chemical yields referred are isolated products.  $^1\text{H}$  NMR and  $^{13}\text{C}$  NMR spectra were recorded on 400 MHz, 500MHz and 600 MHz Bruker spectrometers. Chemical shifts of  $^1\text{H}$  were reported in part per million relative to the  $\text{CDCl}_3$  residual peak ( $\delta$  7.260), the  $\text{CD}_3\text{OD}$  residual peak ( $\delta$  3.330), the  $(\text{CD}_3)_2\text{CO}$  residual peak ( $\delta$  2.050). Chemical shifts of  $^{13}\text{C}$  NMR were reported relative to  $\text{CDCl}_3$  ( $\delta$  77.0),  $\text{CD}_3\text{OD}$  ( $\delta$  49.0),  $(\text{CD}_3)_2\text{CO}$  ( $\delta$  206.0). The used abbreviations are as follows: s (singlet), d (doublet), t (triplet), quart. (quartet), quint (quintet), m (multiplet), br (broad). Structural assignments were made with additional information from NOE and HMBC experiments. Multiplets which arise from accidental equality of coupling constants of magnetically non-equivalent protons are marked as virtual (*virt.*). High resolution mass spectra (HRMS) data were measured on a ESI-microTOF II. Major elements, such as Zn, Cd, Cu, Ni, Cr et al. in reaction system were determined by using Microwave plasma-atomic emission spectrometry (Agilent/4210 MP-AES). Melting points were measured on a SGW<sup>®</sup> X-4B and are not corrected. Reactions were monitored by TLC analysis using silica gel 60 Å F-254 thin layer plates and compounds were visualized with a UV light at 254 nm or 365 nm.

## 2. Synthesis of phenylcyclohexene derivatives

### 2.1 General procedure for the synthesis of phenyl-substituted cyclohexene

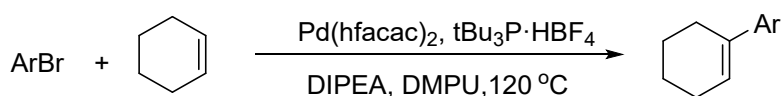

Phenyl-substituted cyclohexene were synthesized according to previously reported procedures:<sup>[1]</sup> Under a  $\text{N}_2$  condition, a dry 15-mL reaction tube containing a magnetic stir bar was charged with  $\text{Pd}(\text{hfacac})_2$  (10 mg, 4 mol%),  $\text{P-}^t\text{Bu}_3\cdot\text{HBF}_4$  (12 mg, 8 mol%) and 2.5 mL of dry DMPU. After stirring at room temperature for 10 minutes, *p-tert*-butylphenyl bromide (105 mg, 0.50 mmol), DIPEA (95 mg, 1.5 equiv, 0.75 mmol), cyclohexene (205 mg, 5 equiv, 0.50 mmol) was added in sequence. The tube was capped tightly and the mixture was vigorous stirred in a 120 °C oil bath for 30 hours. After cooling down to room temperature, the solution was filtered through a small amount of silica gel. The residue was purified by flash chromatography (hexane) on silica gel to afford the corresponding 4'-(*tert*-butyl)-2,3,4,5-tetrahydro-1,1'-biphenyl as a white solid (96 mg, 90%). Other

chemical reagent were used as received from commercial sources unless noted.

## 2.2 General procedure for the synthesis of substituted cyclohexenyl benzene

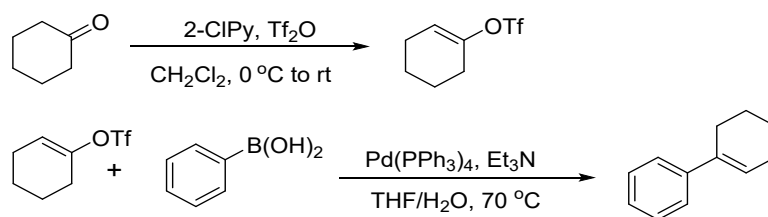

Cyclohexenyl benzene were also synthesized according to previously reported procedures:<sup>[2,3]</sup> To a solution of 4-*tert*-butylcyclohexanone (162 mg, 1.1 mmol) in anhydrous CH<sub>2</sub>Cl<sub>2</sub> (5 mL) was added 2-chloropyridine (0.11 mL, 1.2 mmol, 1.1 equiv) at 0 °C. After stirring at 0 °C for 10 min, trifluoromethanesulfonic anhydride (0.21 mL, 1.3 mmol, 1.2 equiv) was added dropwise. The resulting solution was warmed to 30 °C and stirred for 2h under a nitrogen atmosphere. After the completion of the reaction, the solution was concentrated and the resulting cherry-color oil was purified by flash column chromatography on silica gel to afford 4-(*tert*-butyl)cyclohex-1-en-1-yl trifluoromethanesulfonate. Under a nitrogen atmosphere, a dry Schlenk tube was charged with THF (5 ml), deionized H<sub>2</sub>O (1 mL) and Et<sub>3</sub>N (5.0 mmol). Then phenylboronic acid (2.0 mmol) and the trifluoromethanesulfonate (1.0 mmol) were added. The reaction was stirred at 70 °C for 2 hours or until completion (TLC). Then H<sub>2</sub>O (5 mL) was added and the resulting mixture was extracted with EtOAc (2\*15 mL), then the organic phase was dried over Na<sub>2</sub>SO<sub>4</sub> and concentrated under vacuum. The residue was purified by flash chromatography (hexane) on silica gel to afford the corresponding 4-(*Tert*-butyl)-2,3,4,5-tetrahydro-1,1'-biphenyl as a light yellow liquid (148 mg, 63%). Other chemical reagent was used as received from commercial sources unless noted.

## 3. General procedures for dehydrogenation reaction

### 3.1. General methods for the synthesis of biphenyl derivatives

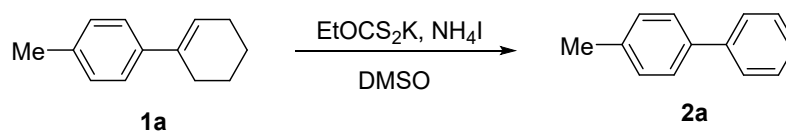

A mixture of 4'-methyl-2,3,4,5-tetrahydro-1,1'-biphenyl (0.5 mmol, 86 mg), EtOCS<sub>2</sub>K (80 mg, 1.0 equiv, 0.5 mmol), NH<sub>4</sub>I (145 mg, 2 equiv, 1.0 mmol) were added in a 15 mL Schlenk tube. After stirring for 24 h at 150 °C, the solution was filtered through a small amount of silica gel, concentrated under vacuum. The residue was purified by flash chromatography (hexane, R<sub>f</sub> = 0.8) on

silica gel which furnished product **2a** (76 mg, 90%) as a white solid. The following compounds 2c-2u and 2af-2ak were prepared by a similar method, unless otherwise note.

### 3.2. Synthesis of 1,1'-biphenyl **2b** in 1 mmol-scale

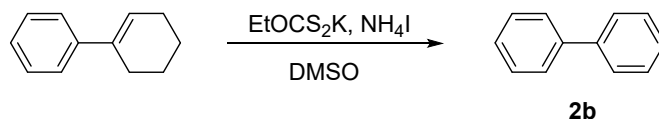

A mixture of 2,3,4,5-tetrahydro-1,1'-biphenyl (1.0 mmol), EtOCS<sub>2</sub>K (160 mg, 1.0 mmol, 1 equiv.), NH<sub>4</sub>I (190 mg, 2.0 mmol, 2 equiv.) and DMSO (3 mL) were added in a 15 mL Schlenk tube. After stirring for 12 h at 130 °C, the solution was filtered through a small amount of silica gel, concentrated under vacuum. The residue was purified by flash chromatography (Hexane, R<sub>f</sub>=0.8) on silica gel which furnished product 1,1'-biphenyl **2b** (135mg, 88%) as a white solid.

### 3.3. Table S1. Optimization of reaction conditions for synthesis of naphthalene <sup>a</sup>

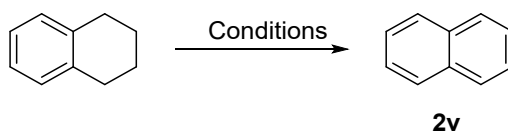

| Entry          | EtOCS <sub>2</sub> K (eq) | NH <sub>4</sub> I (eq) | Addition                                   | Time (h)  | Yield <sup>b</sup> (%) |
|----------------|---------------------------|------------------------|--------------------------------------------|-----------|------------------------|
| 1 <sup>c</sup> | 1                         | 2                      | -                                          | 18        | <5                     |
| 2              | 1                         | 2                      | -                                          | 18        | 17                     |
| 3              | 1                         | 2                      | LiO <sup>t</sup> Bu (1 eq)                 | 18        | 22                     |
| 4              | 1                         | 2                      | KO <sup>t</sup> Bu (1 eq)                  | 18        | 21                     |
| 5              | 1                         | 2                      | Na <sub>2</sub> CO <sub>3</sub> (1 eq)     | 18        | 24                     |
| 6              | 1                         | 2                      | Cs <sub>2</sub> CO <sub>3</sub> (1 eq)     | 18        | 23                     |
| 7              | 1                         | 2                      | Na <sub>2</sub> CO <sub>3</sub> (1 eq)     | 36        | 44                     |
| 8              | 1                         | 2                      | Na <sub>2</sub> CO <sub>3</sub> (2 eq)     | 36        | <5                     |
| 9              | 2                         | 2                      | Na <sub>2</sub> CO <sub>3</sub> (1 eq)     | 36        | 34                     |
| 10             | 1                         | 3                      | Na <sub>2</sub> CO <sub>3</sub> (1 eq)     | 36        | 38                     |
| <b>11</b>      | <b>1</b>                  | <b>2</b>               | <b>Na<sub>2</sub>CO<sub>3</sub> (1 eq)</b> | <b>72</b> | <b>95</b>              |

<sup>a</sup>Reaction conditions: 1,2,3,4-tetrahydronaphthalene (0.5 mmol), EtOCS<sub>2</sub>K, NH<sub>4</sub>I in DMSO (2 mL).

<sup>b</sup>Isolated yields.

**Scheme S1.** Control experiments for thioether oxidation reaction.

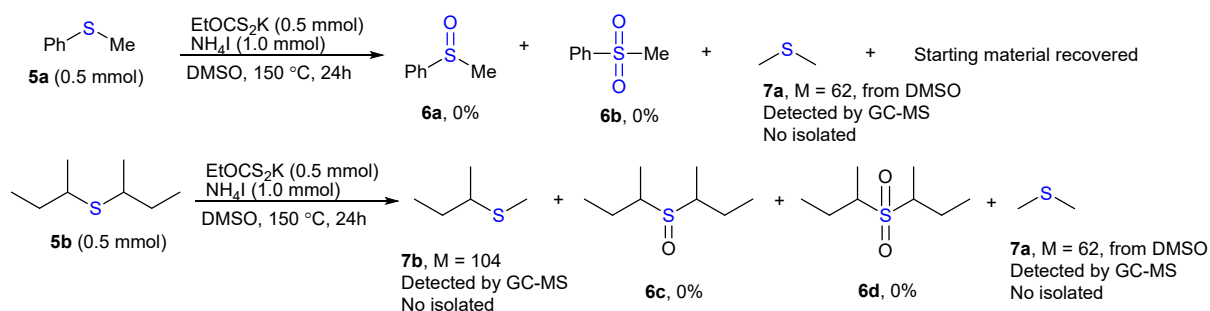

**Scheme S2.** Proposed mechanism for synthesis of 2v-2y, 2ad-2ae

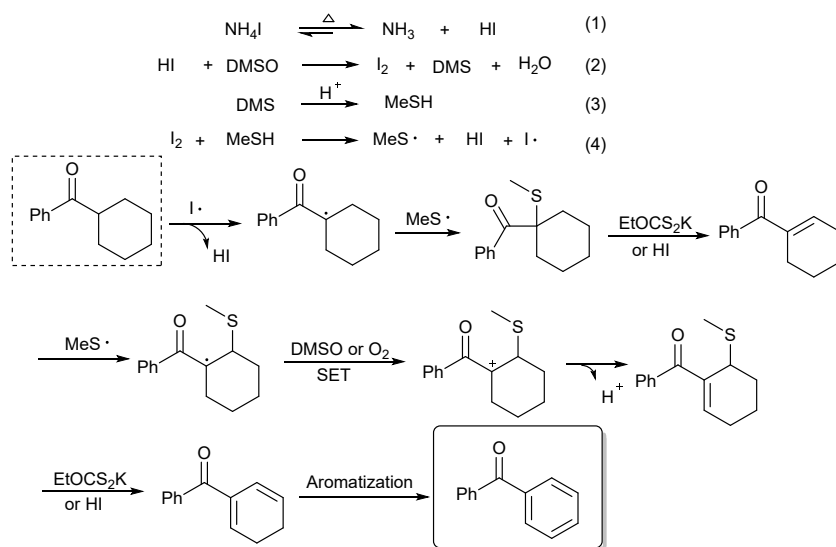

For radical coupling reaction, see ref: B. Du, B. Jin, P. Sun, *Org. Lett.* 2014, **16**, 3032–3035.

**Scheme S3.** Proposed mechanism for synthesis of 2af-2ah

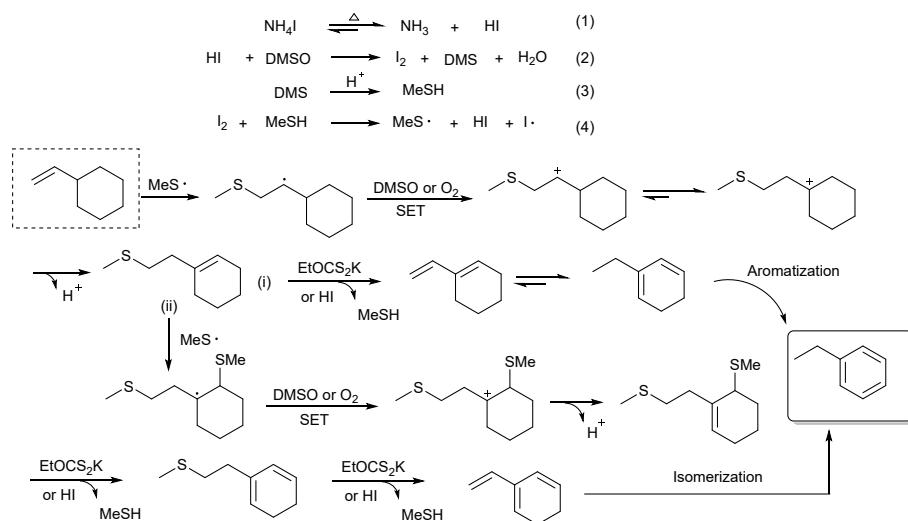

For Isomerization of Alkene, see ref: (a) W. Chen, Y. Chen, X. Gu, Z. Chen, C. Y. Ho, *Nat Commun.*, 2022, **13**, 5507; (b) B. A. Kustiana, S. A. Elsherbeni, T. G. Linford-Wood, R. L. Melen, M. N. Grayson, L. C. Morrill, *Chem. Eur. J.* 2022, **28**, e202202454; (c) S. De-Botton, D. S. O. A. Filippov, E. S. Shubina, N. V. Belkova, D. Gelman, *ChemCatChem* 2020, 5959.

#### 4. Analytical data of all products

##### 4'-Methyl-2,3,4,5-tetrahydro-1,1'-biphenyl (1a)<sup>[4]</sup>

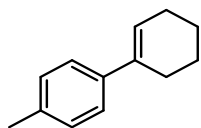

Yellow oil liquid, 76 mg, 88%. TLC (Hexane):  $R_f$  = 0.7.  $^1\text{H}$  NMR (500 MHz,  $\text{CDCl}_3$ )  $\delta$  7.32 – 7.28 (m, 2H), 7.13 (d,  $J$  = 8.1 Hz, 2H), 6.13 – 6.07 (m, 1H), 2.44 – 2.39 (m, 2H), 2.35 (s, 3H), 2.25 – 2.19 (m, 2H), 1.83 – 1.77 (m, 2H), 1.71 – 1.65 (m, 2H).  $^{13}\text{C}$  NMR (125 MHz,  $\text{CDCl}_3$ )  $\delta$  139.8, 136.3, 136.1, 128.8 (2C), 124.8 (2C), 123.9, 27.4, 25.8, 23.1, 22.2, 21.0.

##### 4'-(Tert-butyl)-2,3,4,5-tetrahydro-1,1'-biphenyl (1b)<sup>[1]</sup>

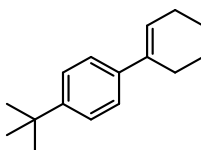

Light yellow liquid, 96 mg, 90%. TLC (Hexane):  $R_f$  = 0.7.  $^1\text{H}$  NMR (500 MHz,  $\text{CDCl}_3$ )  $\delta$  7.35 (m, 4H), 6.21 – 6.07 (m, 1H), 2.46 – 2.40 (m, 2H), 2.25 – 2.19 (m, 2H), 1.84 – 1.76 (m, 2H), 1.71 – 1.64 (m, 2H), 1.34 (s, 9H).  $^{13}\text{C}$  NMR (125 MHz,  $\text{CDCl}_3$ )  $\delta$  149.4, 139.7, 136.2, 125.0 (2C), 124.5 (2C), 124.0, 34.4, 31.3 (3C), 27.3, 25.9, 23.1, 22.2.

##### 3',4'-Dimethyl-2,3,4,5-tetrahydro-1,1'-biphenyl (1c)

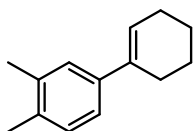

Yellow oil liquid, 81 mg, 87%. TLC (Hexane/ethyl acetate=100/1):  $R_f$  = 0.8.  $^1\text{H}$  NMR (500 MHz,  $\text{CDCl}_3$ )  $\delta$  7.16 (s, 1H), 7.14 – 7.10 (m, 1H), 7.07 (d,  $J$  = 7.8 Hz, 1H), 6.10 – 6.04 (m, 1H), 2.42 – 2.37 (m, 2H), 2.26 (s, 3H), 2.25 (s, 3H), 2.22 – 2.17 (m, 2H), 1.80 – 1.74 (m, 2H), 1.68 – 1.62 (m, 2H).  $^{13}\text{C}$  NMR (125 MHz,  $\text{CDCl}_3$ )  $\delta$  140.4, 136.5, 136.1, 134.8, 129.4, 126.3, 123.8, 122.4, 27.5, 25.8, 23.1, 22.2, 19.9, 19.4. ESI-HRMS ( $m/z$ )  $[\text{M}+\text{Na}]^+$  calcd for  $\text{C}_{14}\text{H}_{18}\text{Na}$ , 209.1301, found: 209.1296.

##### 4'-Methoxy-2,3,4,5-tetrahydro-1,1'-biphenyl (1d)<sup>[4]</sup>

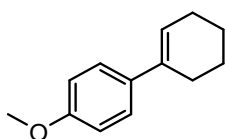

Brown liquid, 77 mg, 82%. TLC (Hexane):  $R_f$  = 0.7.  $^1\text{H}$  NMR (500 MHz,  $\text{CDCl}_3$ )  $\delta$  7.39 – 7.29 (m, 2H), 6.89 – 6.82 (m, 2H), 6.09 – 5.99 (m, 1H), 3.81 (s, 3H), 2.43 – 2.35 (m, 2H), 2.24 – 2.16 (m, 2H), 1.81 – 1.75 (m, 2H), 1.69 – 1.63 (m, 2H).  $^{13}\text{C}$  NMR (125 MHz,  $\text{CDCl}_3$ )  $\delta$  158.3, 135.8, 135.3, 125.9 (2C), 123.1 (2C), 113.5, 55.2, 27.4, 25.8, 23.1, 22.2.

##### 2',3',4',5'-Tetrahydro-[1,1'-biphenyl]-4-ol (1e)

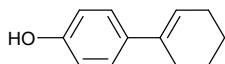

White solid, 149 mg, 86%. m.p. 108-110 °C. TLC (Hexane/ethyl acetate=20/1):  $R_f$  = 0.4.  $^1\text{H}$  NMR (500 MHz,  $\text{CDCl}_3$ )  $\delta$  7.31 – 7.24 (m, 2H), 6.82 – 6.74 (m, 2H), 6.07 – 5.99 (m, 1H), 5.33 (s, 1H), 2.40 – 2.35 (m, 2H), 2.23 – 2.17 (m, 2H), 1.81 – 1.74 (m, 2H), 1.69 – 1.62 (m, 2H).  $^{13}\text{C}$  NMR (125 MHz, Chloroform-d)  $\delta$  154.2, 135.8, 135.5, 126.1 (2C), 123.2,

115.0 (2C), 27.4, 25.8, 23.0, 22.1. ESI-HRMS ( $m/z$ )  $[M+H]^+$  calcd for  $C_{12}H_{15}O$ , 175.1117, found: 175.1113.

#### 2',3',4',5'-Tetrahydro-[1,1'-biphenyl]-4-carbonitrile (1f)

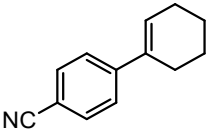 Brown solid, 164 mg, 90%. m.p. 64-66 °C. TLC (Hexane/ethyl acetate=1/1):  $R_f$ =0.5.  $^1H$  NMR (500 MHz,  $CDCl_3$ )  $\delta$  7.57 (d,  $J$  = 8.2 Hz, 2H), 7.45 (d,  $J$  = 8.3 Hz, 2H), 6.30 – 6.22 (m, 1H), 2.41 – 2.35 (m, 2H), 2.27 – 2.21 (m, 2H), 1.81 – 1.76 (m, 2H), 1.69 – 1.64 (m, 2H).  $^{13}C$  NMR (125 MHz,  $CDCl_3$ )  $\delta$  147.0, 135.3, 132.0, 128.4, 125.4, 119.2, 109.7, 27.0, 26.0, 22.7, 21.8. ESI-HRMS ( $m/z$ )  $[M+H]^+$  calcd for  $C_{13}H_{14}N$ , 184.1121, found: 184.1117.

#### 4'-Nitro-2,3,4,5-tetrahydro-1,1'-biphenyl (1g)

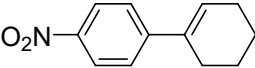 Brown liquid, 166 mg, 82%. TLC (Hexane/ethyl acetate=50/1):  $R_f$ =0.5.  $^1H$  NMR (500 MHz,  $CDCl_3$ )  $\delta$  8.18 – 8.11 (m, 2H), 7.52 – 7.45 (m, 2H), 6.34 – 6.30 (m, 1H), 2.43 – 2.38 (m, 2H), 2.28 – 2.22 (m, 2H), 1.83 – 1.76 (m, 2H), 1.70 – 1.64 (m, 2H).  $^{13}C$  NMR (125 MHz,  $CDCl_3$ )  $\delta$  149.0, 146.2, 135.1, 129.3, 125.3 (2C), 123.5 (2C), 27.0, 26.0, 22.7, 21.7. ESI-HRMS ( $m/z$ )  $[M+H]^+$  calcd for  $C_{12}H_{14}NO_2$ , 204.1019, found: 204.1014.

#### 2',3',4',5'-tetrahydro-[1,1'-biphenyl]-4-carboxylic acid (1h)

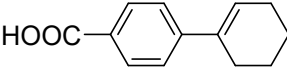 White solid, 161 mg, 80%. m.p. 200-202 °C. TLC(Hexane/ethyl cetate=5/1):  $R_f$ =0.4.  $^1H$  NMR (500 MHz,  $CDCl_3$ )  $\delta$  8.08 – 8.01 (m, 2H), 7.51 – 7.44 (m, 2H), 6.32 – 6.25 (m, 1H), 2.46 – 2.41 (m, 2H), 2.28 – 2.21 (m, 2H), 1.84 – 1.76 (m, 2H), 1.72 – 1.64 (m, 2H).  $^{13}C$  NMR (125 MHz,  $CDCl_3$ )  $\delta$  172.2, 148.0, 135.8, 130.2, 127.6, 127.1, 124.8, 27.1, 26.0, 22.9, 21.9. ESI-HRMS ( $m/z$ )  $[M+H]^+$  calcd for  $C_{13}H_{15}O_2$ , 203.1067, found: 203.1067.

#### Methyl- 2',3',4',5'-tetrahydro-[1,1'-biphenyl]-4-carboxylate (1i)<sup>[1]</sup>

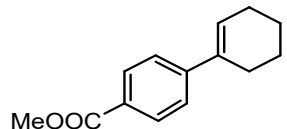 White solid, 97 mg, 90%. m.p. 85-87 °C. TLC(Hexane/ethyl cetate=50/1):  $R_f$ =0.6.  $^1H$  NMR (500 MHz,  $CDCl_3$ )  $\delta$  8.01 – 7.93 (m, 2H), 7.47 – 7.40 (m, 2H), 6.28 – 6.22 (m, 1H), 3.90 (s, 3H), 2.44 – 2.39 (m, 2H), 2.26 – 2.21 (m, 2H), 1.82 – 1.76 (m, 2H), 1.69 – 1.64 (m, 2H).  $^{13}C$  NMR (125 MHz,  $CDCl_3$ )  $\delta$  167.1, 147.1, 135.9, 129.6 (2C), 128.0, 127.2, 124.7 (2C), 52.0, 27.1, 26.0, 22.9, 22.0.

#### 2'-Fluoro-2,3,4,5-tetrahydro-1,1'-biphenyl (1j)

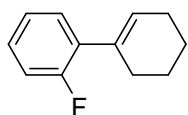

Brown liquid, 155 mg, 88%. TLC (Hexane/ethyl acetate=100/1):  $R_f=0.4$ .  $^1\text{H}$  NMR (500 MHz,  $\text{CDCl}_3$ )  $\delta$  7.25 – 7.15 (m, 2H), 7.07 (t,  $J = 7.5$  Hz, 1H), 7.01 (dd,  $J = 11.2, 8.1$  Hz, 1H), 5.97 – 5.90 (m, 1H), 2.40 – 2.34 (m, 2H), 2.24 – 2.17 (m, 2H), 1.80 – 1.74 (m, 2H), 1.71 – 1.67 (m, 2H).  $^{13}\text{C}$  NMR (125 MHz,  $\text{CDCl}_3$ )  $\delta$  159.9 (d,  $J = 246.9$  Hz), 133.7, 131.5 (d,  $J = 14.0$  Hz), 129.3 (d,  $J = 4.7$  Hz), 128.1 (d,  $J = 3.0$  Hz), 127.8 (d,  $J = 8.3$  Hz), 123.8 (d,  $J = 3.6$  Hz), 115.6 (d,  $J = 23.0$  Hz), 28.7 (d,  $J = 3.4$  Hz), 25.7, 22.9, 22.0. ESI-HRMS ( $m/z$ )  $[\text{M}+\text{H}]^+$  calcd for  $\text{C}_{12}\text{H}_{14}\text{F}$ , 177.1074, found:177.1070.

### 2,2'',3,3'',4,4'',5,5''-Octahydro-1,1':4',1''-terphenyl (1k)

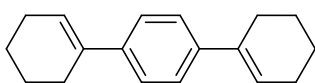

White solid, 126 mg, 81%. m.p. 107-109 °C. TLC (Hexane/ethyl acetate=100/1):  $R_f=0.5$ .  $^1\text{H}$  NMR (500 MHz,  $\text{CDCl}_3$ )  $\delta$  7.34 (s, 4H), 6.17 – 6.11 (m, 2H), 2.44 – 2.39 (m, 4H), 2.24 – 2.19 (m, 4H), 1.81 – 1.76 (m, 4H), 1.70 – 1.64 (m, 4H).  $^{13}\text{C}$  NMR (125 MHz,  $\text{CDCl}_3$ )  $\delta$  140.7 (2C), 136.2 (4C), 124.6 (2C), 124.2 (2C), 27.3 (2C), 25.9 (2C), 23.1 (2C), 22.2 (2C). ESI-HRMS ( $m/z$ )  $[\text{M}+\text{Na}]^+$  calcd for  $\text{C}_{18}\text{H}_{22}\text{Na}$ , 261.1614, found: 261.1609.

### 1-(Cyclohex-1-en-1-yl)naphthalene (1l)

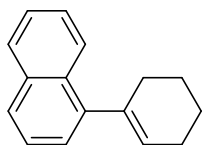

White solid, 185 mg, 89%. m.p. 50-51 °C. TLC (Hexane):  $R_f=0.7$ .  $^1\text{H}$  NMR (500 MHz,  $\text{CDCl}_3$ )  $\delta$  8.07 – 8.01 (m, 1H), 7.88 – 7.83 (m, 1H), 7.75 (d,  $J = 8.2$  Hz, 1H), 7.51 – 7.46 (m, 2H), 7.44 (dd,  $J = 8.3, 7.0$  Hz, 1H), 7.28 (dd,  $J = 7.0, 1.3$  Hz, 1H), 5.83 – 5.76 (m, 1H), 2.42 – 2.38 (m, 2H), 2.32 – 2.26 (m, 2H), 1.90 – 1.85 (m, 2H), 1.84 – 1.78 (m, 2H).  $^{13}\text{C}$  NMR (125 MHz,  $\text{CDCl}_3$ )  $\delta$  143.1, 137.6, 133.7, 131.4, 128.2, 127.2, 126.7, 125.8, 125.5, 125.5, 125.4, 124.8, 31.0, 25.5, 23.2, 22.3. ESI-HRMS ( $m/z$ )  $[\text{M}+\text{Na}]^+$  calcd for  $\text{C}_{16}\text{H}_{16}\text{Na}$ , 231.1144, found: 231.1142.

### 6-(Cyclohex-1-en-1-yl)quinoline (1m)

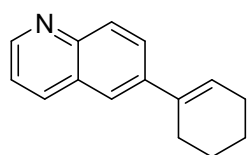

Yellow liquid, 177 mg, 85%. TLC (Hexane/ethyl acetate=5/1):  $R_f = 0.4$ .  $^1\text{H}$  NMR (500 MHz,  $\text{CDCl}_3$ )  $\delta$  8.80 (dd,  $J = 4.2, 1.8$  Hz, 1H), 8.08 – 7.96 (m, 2H), 7.79 (dd,  $J = 8.9, 2.1$  Hz, 1H), 7.65 (d,  $J = 2.1$  Hz, 1H), 7.29 (dd,  $J = 8.3, 4.2$  Hz, 1H), 6.32 – 6.25 (m, 1H), 2.50 – 2.44 (m, 2H), 2.26 – 2.20 (m, 2H), 1.83 – 1.74 (m, 2H), 1.69 – 1.62 (m, 2H).  $^{13}\text{C}$  NMR (125 MHz,  $\text{CDCl}_3$ )  $\delta$  149.5, 147.4, 140.3, 135.9, 135.5, 128.8, 128.1, 127.3, 126.4, 122.5, 121.0, 27.1, 25.9, 22.8, 21.9. ESI-HRMS ( $m/z$ )  $[\text{M}+\text{H}]^+$  calcd for  $\text{C}_{15}\text{H}_{16}\text{N}$ , 210.1277, found: 210.1272.

### 4-(Cyclohex-1-en-1-yl)isoquinoline (1n)



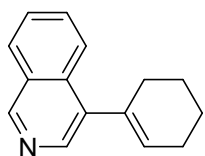

Yellow liquid, 171 mg, 82%. TLC (Hexane/ethyl acetate=5/1):  $R_f=0.4$ .  $^1\text{H}$  NMR (500 MHz,  $\text{CDCl}_3$ )  $\delta$  9.12 (s, 1H), 8.32 (s, 1H), 7.94 (t,  $J = 7.5$  Hz, 2H), 7.67 – 7.62 (m, 1H), 7.58 – 7.53 (m, 1H), 5.85 – 5.79 (m, 1H), 2.38 – 2.33 (m, 2H), 2.29 – 2.23 (m, 2H), 1.87 – 1.81 (m, 2H), 1.79 – 1.73 (m, 2H).  $^{13}\text{C}$  NMR (125 MHz,  $\text{CDCl}_3$ )  $\delta$  151.1, 141.3, 135.7, 134.2, 134.1, 129.9, 128.9, 128.3, 127.7, 126.8, 124.6, 30.7, 25.5, 23.0, 22.0. ESI-HRMS ( $m/z$ )  $[\text{M}+\text{H}]^+$  calcd for  $\text{C}_{15}\text{H}_{16}\text{N}$ , 210.1277, found: 210.1272.

### 3-(Cyclohex-1-en-1-yl)pyridine (1o)

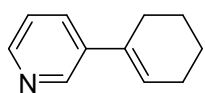

Yellow liquid, 135 mg, 85%. TLC (Hexane/ethyl acetate=5/1):  $R_f=0.4$ .  $^1\text{H}$  NMR (500 MHz,  $\text{CDCl}_3$ )  $\delta$  8.63 (d,  $J = 2.3$  Hz, 1H), 8.44 (dd,  $J = 4.8, 1.6$  Hz, 1H), 7.64 (dt,  $J = 8.0, 2.0$  Hz, 1H), 7.22 (dd,  $J = 8.0, 4.8$  Hz, 1H), 6.19 – 6.13 (m, 1H), 2.41 – 2.37 (m, 2H), 2.25 – 2.19 (m, 2H), 1.82 – 1.76 (m, 2H), 1.70 – 1.64 (m, 2H).  $^{13}\text{C}$  NMR (125 MHz,  $\text{CDCl}_3$ )  $\delta$  147.5, 146.5, 137.9, 133.8, 132.2, 126.7, 123.1, 27.0, 25.8, 22.8, 21.9. ESI-HRMS ( $m/z$ )  $[\text{M}+\text{H}]^+$  calcd for  $\text{C}_{11}\text{H}_{14}\text{N}$ , 160.1121, found: 160.1111.

### 5-(cyclohex-1-en-1-yl)-2-methylpyridine (1p)

Yellow liquid, 145 mg, 84%. TLC (Hexane/ethyl acetate=3/1):  $R_f=0.5$ .  $^1\text{H}$  NMR (500 MHz,  $\text{CDCl}_3$ )  $\delta$  8.48 (d,  $J = 2.4$  Hz, 1H), 7.51 (dd,  $J = 8.1, 2.4$  Hz, 1H), 7.04 (d,  $J = 8.1$  Hz, 1H), 6.11 – 6.05 (m, 1H), 2.50 (s, 3H), 2.36 – 2.32 (m, 2H), 2.20 – 2.15 (m, 2H), 1.79 – 1.72 (m, 2H), 1.66 – 1.60 (m, 2H).  $^{13}\text{C}$  NMR (126 MHz,  $\text{CDCl}_3$ )  $\delta$  156.1, 145.7, 134.9, 133.7, 132.5, 125.6, 122.5, 27.0, 25.7, 23.9, 22.7, 21.9. ESI-HRMS ( $m/z$ )  $[\text{M}+\text{H}]^+$  calcd for  $\text{C}_{12}\text{H}_{16}\text{N}$ , 174.1277, found: 174.1272.

### 4-Methyl-2,3,4,5-tetrahydro-1,1'-biphenyl (1q)

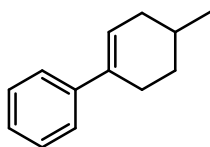

Light yellow liquid, 62 mg, 72%. TLC (Hexane):  $R_f=0.8$ .  $^1\text{H}$  NMR (500 MHz,  $\text{CDCl}_3$ )  $\delta$  7.42 – 7.37 (m, 2H), 7.31 (t,  $J = 7.7$  Hz, 2H), 7.22 (t,  $J = 7.3$  Hz, 1H), 6.13 – 6.07 (m, 1H), 2.49 – 2.44 (m, 2H), 2.34 – 2.25 (m, 1H), 1.90 – 1.85 (m, 1H), 1.85 – 1.78 (m, 1H), 1.77 – 1.70 (m, 1H), 1.43 – 1.33 (m, 1H), 1.02 (d,  $J = 6.5$  Hz, 3H).  $^{13}\text{C}$  NMR (125 MHz,  $\text{CDCl}_3$ )  $\delta$  142.4, 136.1, 128.2 (2C), 126.5, 124.9 (2C), 124.3, 34.4, 31.3, 28.1, 27.4, 21.7. ESI-HRMS ( $m/z$ )  $[\text{M}+\text{H}]^+$  calcd for  $\text{C}_{13}\text{H}_{17}$ , 173.1325, found: 173.1322.

### 4-Propyl-2,3,4,5-tetrahydro-1,1'-biphenyl (1r)

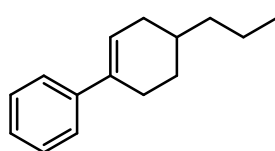

Light yellow liquid, 68 mg, 68%. TLC (Hexane):  $R_f=0.8$ .  $^1\text{H}$  NMR (500 MHz,  $\text{CDCl}_3$ )  $\delta$  7.47 – 7.41 (m, 2H), 7.39 – 7.32 (m, 2H), 7.28 – 7.24 (m, 1H), 6.19 – 6.13 (m, 1H), 2.56 – 2.46 (m, 2H), 2.42 – 2.34 (m, 1H), 2.00 –

1.94 (m, 1H), 1.92 – 1.84 (m, 1H), 1.72 – 1.62 (m, 1H), 1.49 – 1.32 (m, 5H), 0.99 (t,  $J = 7.2$  Hz, 3H).  $^{13}\text{C}$  NMR (125 MHz,  $\text{CDCl}_3$ )  $\delta$  142.3, 136.4, 128.1 (2C), 126.5, 124.9 (2C), 124.3, 38.7, 32.8, 32.6, 29.4, 27.4, 20.1, 14.4. ESI-HRMS ( $m/z$ )  $[\text{M}+\text{H}]^+$  calcd for  $\text{C}_{15}\text{H}_{21}$ , 201.1638, found: 201.1635.

#### 4-(Tert-butyl)-2,3,4,5-tetrahydro-1,1'-biphenyl (1s)

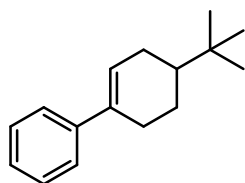

Light yellow liquid, 75 mg, 70%. TLC (Hexane):  $R_f = 0.8$ .  $^1\text{H}$  NMR (500 MHz,  $\text{CDCl}_3$ )  $\delta$  7.45 – 7.41 (m, 2H), 7.36 – 7.31 (m, 2H), 7.26 – 7.22 (m, 1H), 6.19 – 6.15 (m, 1H), 2.59 – 2.53 (m, 1H), 2.53 – 2.41 (m, 1H), 2.34 – 2.24 (m, 1H), 2.07 – 1.96 (m, 2H), 1.45 – 1.29 (m, 2H), 0.96 (s, 9H).  $^{13}\text{C}$  NMR (125 MHz,  $\text{CDCl}_3$ )  $\delta$  142.2, 136.3, 128.2 (2C), 126.4 (2C), 124.9 (2C), 43.8, 32.2, 28.8, 27.5, 27.2 (3C), 24.4. ESI-HRMS ( $m/z$ )  $[\text{M}+\text{H}]^+$  calcd for  $\text{C}_{16}\text{H}_{22}\text{Na}$ , 237.1614, found: 237.1605.

#### 6-(Cyclohex-1-en-1-yl)-2,3,4,5-tetrahydro-1,1'-biphenyl (1t)

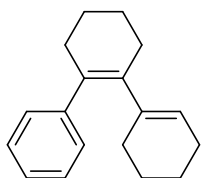

Light yellow liquid, 152 mg, 64%. TLC (Hexane):  $R_f = 0.8$ .  $^1\text{H}$  NMR (500 MHz,  $\text{CDCl}_3$ )  $\delta$  7.26 – 7.12 (m, 5H), 5.27 (tt,  $J = 3.7, 1.8$  Hz, 5H), 2.36 – 2.32 (m, 2H), 2.21 – 2.17 (m, 2H), 1.88 – 1.83 (m, 2H), 1.82 – 1.78 (m, 2H), 1.76 – 1.69 (m, 4H), 1.47 – 1.38 (m, 4H).  $^{13}\text{C}$  NMR (125 MHz,  $\text{CDCl}_3$ )  $\delta$  144.78, 139.87, 137.77, 131.88, 128.14 (2C), 127.42 (2C), 125.56, 125.11, 31.42, 30.27, 28.30, 25.31, 23.30, 23.10, 22.89, 22.08. ESI-HRMS ( $m/z$ )  $[\text{M}+\text{Na}]^+$  calcd for  $\text{C}_{18}\text{H}_{22}\text{Na}$ , 261.1614, found: 261.1609.

#### 2-(Cyclohex-1-en-1-yl)vinylbenzene (1u)<sup>[5]</sup>

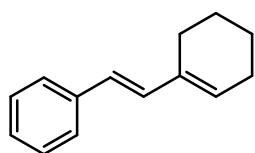

Light yellow liquid, 56 mg, 61%. TLC (Hexane/ethyl acetate=100/1):  $R_f = 0.7$ .  $^1\text{H}$  NMR (500 MHz,  $\text{CDCl}_3$ )  $\delta$  7.43 – 7.38 (m, 2H), 7.34 – 7.28 (m, 2H), 7.23 – 7.16 (m, 1H), 6.78 (d,  $J = 16.2$  Hz, 1H), 6.45 (d,  $J = 16.2$  Hz, 1H), 5.91 (t,  $J = 4.2$  Hz, 1H), 2.31 – 2.27 (m, 2H), 2.23 – 2.17 (m, 2H), 1.77 – 1.62 (m, 4H).  $^{13}\text{C}$  NMR (125 MHz,  $\text{CDCl}_3$ )  $\delta$  138.0, 135.8, 132.6, 130.8, 128.5 (2C), 126.8, 126.1 (2C), 124.6, 26.1, 24.5, 22.5, 22.5.

#### 4-Methyl-1,1'-biphenyl (2a)<sup>[6]</sup>

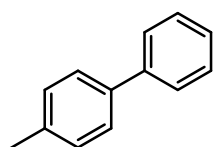

White solid, 76 mg, 90%. m.p. 44-47 °C. TLC (hexane):  $R_f = 0.8$ .  $^1\text{H}$  NMR (500 MHz,  $\text{CDCl}_3$ )  $\delta$  7.62 (dd,  $J = 8.2, 1.1$  Hz, 2H), 7.53 (d,  $J = 8.1$  Hz, 2H), 7.46 (t,  $J = 7.7$  Hz, 2H), 7.37 (d,  $J = 7.4$  Hz, 1H), 7.29 (d,  $J = 7.9$  Hz, 2H), 2.43 (s, 3H).  $^{13}\text{C}$  NMR (125 MHz,  $\text{CDCl}_3$ )  $\delta$  141.1, 138.3, 137.0, 129.5 (2C), 128.7 (2C), 127.0, 126.9 (4C), 21.1.

#### Biphenyl (2b)<sup>[6]</sup>

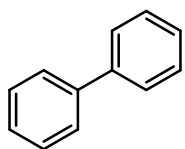

White solid, 71 mg, 93%. m.p. 68-70 °C. TLC (hexane):  $R_f=0.8$ .  $^1\text{H NMR}$  (500 MHz,  $\text{CDCl}_3$ )  $\delta$  7.64 – 7.59 (m, 4H), 7.46 (t,  $J = 7.7$  Hz, 4H), 7.36 (t,  $J = 7.4$  Hz, 2H).  $^{13}\text{C NMR}$  (125 MHz,  $\text{CDCl}_3$ )  $\delta$  141.2 (2C), 128.7 (4C), 127.2 (2C), 127.2 (4C).

#### 4-(Tert-butyl)-1,1'-biphenyl (2c)<sup>[6]</sup>

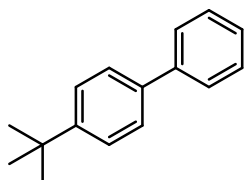

White solid, 89 mg, 85%. m.p. 50-52 °C. TLC (hexane):  $R_f=0.8$ .  $^1\text{H NMR}$  (500 MHz,  $\text{CDCl}_3$ )  $\delta$  7.60 (d,  $J = 7.2$  Hz, 2H), 7.55 (d,  $J = 8.4$  Hz, 2H), 7.48 (d,  $J = 8.4$  Hz, 2H), 7.44 (t,  $J = 7.7$  Hz, 2H), 7.34 (s, 1H), 1.38 (s, 9H).  $^{13}\text{C NMR}$  (125 MHz,  $\text{CDCl}_3$ )  $\delta$  150.2, 141.0, 138.3, 128.7 (2C), 127.0 (2C), 127.0, 126.8 (2C),

125.7 (2C), 34.5, 31.4 (3C).

#### 3,4-Dimethyl-1,1'-biphenyl (2d)<sup>[7]</sup>

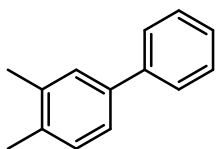

Yellow oil liquid, 75 mg, 82%. TLC (Hexane):  $R_f=0.8$ .  $^1\text{H NMR}$  (500 MHz,  $\text{CDCl}_3$ )  $\delta$  7.65 (d,  $J = 7.4$  Hz, 2H), 7.48 (dd,  $J = 16.1, 8.3$  Hz, 3H), 7.39 (q,  $J = 8.4, 7.4$  Hz, 2H), 7.27 (d,  $J = 7.7$  Hz, 1H), 2.40 (s, 3H), 2.37 (s, 3H).  $^{13}\text{C NMR}$  (125 MHz,  $\text{CDCl}_3$ )  $\delta$  141.2, 138.8, 136.8, 135.6, 130.0, 128.6 (2C), 128.4, 127.0 (2C), 126.9, 124.5, 19.9,

19.4.

#### 4-Methoxy-1,1'-biphenyl (2e)<sup>[6]</sup>

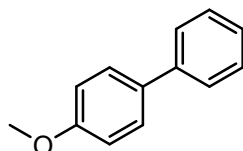

White solid, 78 mg, 85%. m.p. 88-90 °C. TLC (hexane):  $R_f=0.8$ .  $^1\text{H NMR}$  (500 MHz,  $\text{CDCl}_3$ )  $\delta$  7.58 (t,  $J = 9.3$  Hz, 4H), 7.45 (t,  $J = 7.1$  Hz, 2H), 7.34 (t,  $J = 6.8$  Hz, 1H), 7.04 – 6.98 (m, 2H), 3.88 (s, 3H).  $^{13}\text{C NMR}$  (125 MHz,  $\text{CDCl}_3$ )  $\delta$  159.1, 140.8, 133.7, 128.7 (2C), 128.1 (2C), 126.7 (2C), 126.6,

114.1 (2C), 55.3.

#### Biphenyl-4-ol (2f)<sup>[8]</sup>

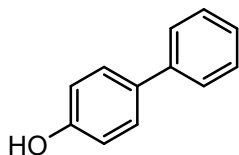

White solid, 56 mg, 66%. m.p. 164-166 °C. TLC (Hexane/ethyl acetate=20/1):  $R_f=0.4$ .  $^1\text{H NMR}$  (500 MHz,  $\text{CD}_3\text{OD}$ )  $\delta$  7.55 – 7.51 (m, 2H), 7.47 – 7.43 (m, 2H), 7.40 – 7.35 (m, 2H), 7.29 – 7.22 (m, 1H), 6.91 – 6.84 (m, 2H), 4.94 (s,

1H).  $^{13}\text{C NMR}$  (125 MHz,  $\text{CD}_3\text{OD}$ )  $\delta$  158.1, 142.4, 133.8, 129.7 (2C), 129.0 (2C), 127.4 (2C), 127.4, 116.6 (2C).

#### [1,1'-Biphenyl]-4-carbonitrile (2g)<sup>[8]</sup>

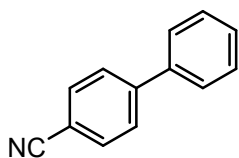

Yellow solid, 73 mg, 82%. m.p. 85-87 °C. TLC (Hexane/ethyl acetate=1/1):  $R_f=0.6$ .  $^1\text{H NMR}$  (500 MHz,  $\text{CDCl}_3$ )  $\delta$  7.74 – 7.67 (m, 4H), 7.59 (d,  $J = 7.2$  Hz,

2H), 7.49 (t,  $J = 7.4$  Hz, 2H), 7.43 (t,  $J = 7.3$  Hz, 1H).  $^{13}\text{C}$  NMR (125 MHz,  $\text{CDCl}_3$ )  $\delta$  145.6, 139.1, 132.6 (2C), 129.1 (2C), 128.6, 127.7 (2C), 127.2 (2C), 118.9, 110.9.

#### 4-Nitro-1,1'-Biphenyl (2h)<sup>[8]</sup>

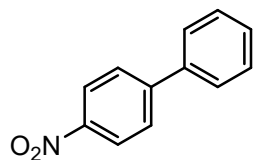

Yellow solid, 82 mg, 82%. m.p. 112-114 °C. TLC (Hexane/ethyl acetate=50/1):

$R_f=0.6$ .  $^1\text{H}$  NMR (500 MHz,  $\text{CDCl}_3$ )  $\delta$  8.30 (d,  $J = 8.8$  Hz, 2H), 7.74 (d,  $J = 8.8$  Hz, 2H), 7.63 (d,  $J = 8.5$  Hz, 2H), 7.50 (t,  $J = 7.3$  Hz, 2H), 7.45 (t,  $J = 7.3$

Hz, 1H).  $^{13}\text{C}$  NMR (125 MHz,  $\text{CDCl}_3$ )  $\delta$  147.6, 147.0, 138.7, 129.1 (2C), 128.9, 127.8 (2C), 127.4 (2C), 124.1 (2C).

#### [1,1'-Biphenyl]-4-carboxylic acid (2i)<sup>[8]</sup>

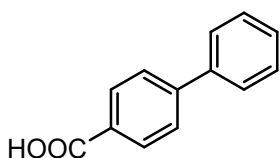

White solid, 69 mg, 70%. m.p. 220-222 °C. TLC (Hexane/ethyl

acetate=5/1):  $R_f=0.4$ .  $^1\text{H}$  NMR (500 MHz,  $\text{CD}_3\text{COCD}_3$ )  $\delta$  8.16 – 8.10 (m, 2H), 7.83 – 7.79 (m, 2H), 7.76 – 7.72 (m, 2H), 7.53 – 7.48 (m, 2H), 7.46 –

7.39 (m, 1H).  $^{13}\text{C}$  NMR (125 MHz,  $\text{CD}_3\text{COCD}_3$ )  $\delta$  167.3, 146.1, 140.5, 131.0 (2C), 130.1 (2C), 129.8, 129.0, 127.9 (2C), 127.7 (2C).

#### 4-(Methoxycarbonyl)biphenyl (2j)<sup>[8]</sup>

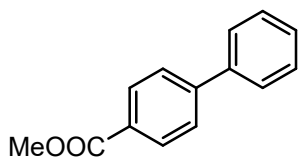

White solid, 28 mg, 26%. m.p. 116-118 °C. TLC (Hexane/ethyl

acetate=5/1):  $R_f=0.7$ .  $^1\text{H}$  NMR (500 MHz,  $\text{CDCl}_3$ )  $\delta$  8.14 – 8.08 (m, 2H), 7.69 – 7.65 (m, 2H), 7.64 – 7.61 (m, 2H), 7.49 – 7.45 (m, 2H), 7.43 – 7.37

(m, 1H), 3.94 (s, 3H).  $^{13}\text{C}$  NMR (125 MHz,  $\text{CDCl}_3$ )  $\delta$  167.0, 145.6, 140.0, 130.1 (2C), 128.9 (2C), 128.9, 128.1, 127.3 (2C), 127.0 (2C), 52.1.

#### 2-Fluoro-1,1'-Biphenyl (2k)<sup>[9]</sup>

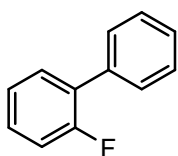

White solid, 73 mg, 85%. m.p. 71-73 °C. TLC (Hexane/ethyl acetate=100/1):  $R_f=0.7$ .

$^1\text{H}$  NMR (500 MHz,  $\text{CDCl}_3$ )  $\delta$  7.60 (dt,  $J = 8.1, 1.5$  Hz, 2H), 7.48 (m,  $J = 7.7, 6.1$

Hz, 3H), 7.44 – 7.39 (m, 1H), 7.35 (ddd,  $J = 9.7, 4.8, 2.1$  Hz, 1H), 7.25 (td,  $J = 7.5, 1.4$  Hz, 1H), 7.20 (ddd,  $J = 10.9, 8.2, 1.3$  Hz, 1H).  $^{13}\text{C}$  NMR (125 MHz,  $\text{CDCl}_3$ )  $\delta$  159.7 (d,  $J = 247.7$  Hz), 135.8, 130.8 (d,  $J = 3.6$  Hz), 129.1, 129.0 (d,  $J = 3.0$  Hz), 128.9 (d,  $J = 8.2$  Hz), 128.4 (2C), 127.6 (2C), 124.3 (d,  $J = 3.7$  Hz), 116.1 (d,  $J = 22.6$  Hz).

#### 1,4-Diphenylbenzene (2l)<sup>[6]</sup>

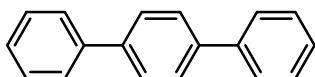

White solid, 90 mg, 78%, m.p. 210-212 °C. TLC (Hexane/ethyl

acetate=100/1):  $R_f=0.5$ .  $^1\text{H}$  NMR (500 MHz,  $\text{CDCl}_3$ )  $\delta$  7.69 (s, 4H), 7.66

(d,  $J = 7.8$  Hz, 4H), 7.47 (t,  $J = 7.7$  Hz, 4H), 7.38 (d,  $J = 7.4$  Hz, 2H).  $^{13}\text{C}$  NMR (125 MHz,  $\text{CDCl}_3$ )  $\delta$  140.7 (2C), 140.1 (2C), 128.8 (4C), 127.5 (4C), 127.3 (2C), 127.0 (4C).

### 1-Phenylanthracene (2m)<sup>[6]</sup>

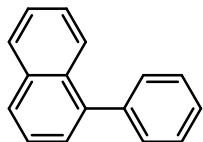

Yellow oil liquid, 84 mg, 82%. TLC (Hexane):  $R_f = 0.7$ .  $^1\text{H}$  NMR (500 MHz,  $\text{CDCl}_3$ )  $\delta$  7.99 (t,  $J = 9.1$  Hz, 2H), 7.93 (d,  $J = 8.2$  Hz, 1H), 7.62 – 7.54 (m, 6H), 7.50 (dd,  $J = 7.6, 5.9$  Hz, 3H).  $^{13}\text{C}$  NMR (125 MHz,  $\text{CDCl}_3$ )  $\delta$  140.7, 140.2, 133.7, 131.6, 130.0 (2C), 128.2 (2C), 127.6 (2C), 127.2, 126.9, 126.0 (2C), 125.7, 125.4.

### 6-Phenylquinoline (2n)<sup>[10]</sup>

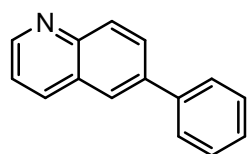

Brown solid, 87 mg, 85%. m.p. 114-116 °C. TLC (Hexane/ethyl acetate=5/1):  $R_f = 0.4$ .  $^1\text{H}$  NMR (500 MHz,  $\text{CDCl}_3$ )  $\delta$  8.94 (s, 1H), 8.33 (t,  $J = 7.6$  Hz, 2H), 8.05 (d,  $J = 4.2$  Hz, 2H), 7.72 (d,  $J = 7.5$  Hz, 2H), 7.52 (t,  $J = 7.4$  Hz, 3H), 7.43 (t,  $J = 7.3$  Hz, 1H).  $^{13}\text{C}$  NMR (125 MHz,  $\text{CDCl}_3$ )  $\delta$  149.9, 147.1, 140.2, 139.6, 136.8, 129.5, 129.5, 129.0 (2C), 128.5, 127.8, 127.5 (2C), 125.5, 121.5.

### 4-Phenylisoquinoline (2o)<sup>[11]</sup>

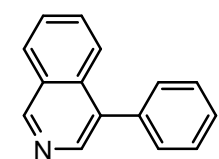

Yellow oil liquid, 82 mg, 80%. TLC (Hexane/ethyl acetate=5/1):  $R_f = 0.4$ .  $^1\text{H}$  NMR (500 MHz,  $\text{CDCl}_3$ )  $\delta$  9.25 (s, 1H), 8.49 (s, 1H), 8.05 – 7.98 (m, 1H), 7.90 (dd,  $J = 8.3, 1.1$  Hz, 1H), 7.67 – 7.58 (m, 2H), 7.54 – 7.43 (m, 5H).  $^{13}\text{C}$  NMR (125 MHz,  $\text{CDCl}_3$ )  $\delta$  151.8, 142.6, 136.8, 134.0, 133.2, 130.5, 129.9 (2C), 128.4 (2C), 128.2, 127.8, 127.7, 127.0, 124.6.

### 2-Phenylpyridine (2p)<sup>[6]</sup>

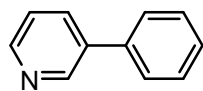

Yellow oil liquid, 64 mg, 82%. TLC (Hexane/ethyl acetate=3/1):  $R_f = 0.7$ .  $^1\text{H}$  NMR (500 MHz,  $\text{CDCl}_3$ )  $\delta$  8.87 – 8.83 (m, 1H), 8.59 (dd,  $J = 4.9, 1.7$  Hz, 1H), 7.90 – 7.85 (m, 1H), 7.60 – 7.56 (m, 2H), 7.50 – 7.45 (m, 2H), 7.43 – 7.38 (m, 1H), 7.36 (m,  $J = 7.8, 4.8$  Hz, 1H).  $^{13}\text{C}$  NMR (125 MHz,  $\text{CDCl}_3$ )  $\delta$  148.3, 148.2, 137.7, 136.6, 134.4, 129.0 (2C), 128.1, 127.1 (2C), 123.5.

### 3-Methyl-5-phenylpyridine (2q)<sup>[12]</sup>

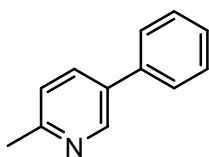

Yellow oil liquid, 66 mg, 78%. TLC (Hexane/ethyl acetate=3/1):  $R_f = 0.5$ .  $^1\text{H}$  NMR (500 MHz,  $\text{CDCl}_3$ )  $\delta$  8.72 (s, 1H), 7.71 (dd,  $J = 8.0, 2.4$  Hz, 1H), 7.51 (d,  $J = 7.5$  Hz, 2H), 7.41 (t,  $J = 7.6$  Hz, 2H), 7.34 (d,  $J = 7.4$  Hz, 1H), 7.16 (d,  $J = 8.0$  Hz, 1H),

2.57 (s, 3H).  $^{13}\text{C}$  NMR (125 MHz,  $\text{CDCl}_3$ )  $\delta$  156.9, 147.2, 137.6, 134.5, 133.5, 128.8, 127.6 (2C), 126.7, 123.0 (2C), 23.8.

#### Methyl-1,1'-biphenyl (2r)<sup>[6]</sup>

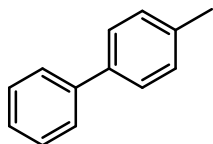

White solid, 59 mg, 70%. m.p. 44-47 °C. TLC (hexane):  $R_f$ =0.8.  $^1\text{H}$  NMR (500 MHz,  $\text{CDCl}_3$ )  $\delta$  7.63 – 7.57 (m, 2H), 7.54 – 7.50 (m, 2H), 7.45 (t,  $J$  = 8.4 Hz, 2H), 7.34 (t,  $J$  = 7.4 Hz, 1H), 7.29 – 7.26 (d, 2H), 2.42 (s, 3H).  $^{13}\text{C}$  NMR (125 MHz,  $\text{CDCl}_3$ )  $\delta$  141.1, 138.3, 137.0, 129.5 (2C), 128.7 (2C), 127.0, 127.0 (4C), 21.1.

#### 4-Propyl-1,1'-biphenyl (2s)<sup>[13]</sup>

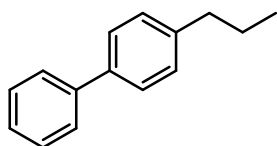

Yellow viscous liquid, 83 mg, 85%. TLC (hexane):  $R_f$ =0.8.  $^1\text{H}$  NMR (500 MHz,  $\text{CDCl}_3$ )  $\delta$  7.71 – 7.66 (m, 2H), 7.61 (d,  $J$  = 8.1 Hz, 2H), 7.51 (t,  $J$  = 7.7 Hz, 2H), 7.41 (t,  $J$  = 7.4 Hz, 1H), 7.34 (d,  $J$  = 8.1 Hz, 2H), 2.75 – 2.69 (m, 2H), 1.78 (h,  $J$  = 7.4 Hz, 2H), 1.08 (t,  $J$  = 7.3 Hz, 3H).  $^{13}\text{C}$  NMR (125 MHz,  $\text{CDCl}_3$ )  $\delta$  141.8, 141.1, 138.5, 128.9 (2C), 128.7 (2C), 127.0 (2C), 126.9 (2C), 126.9, 37.7, 24.5, 13.9.

#### 4-(Tert-butyl)-1,1'-biphenyl (2t)<sup>[6]</sup>

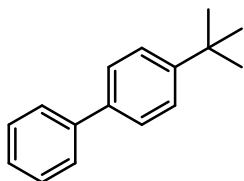

White solid, 87 mg, 83%. m.p. 50-52 °C. TLC (hexane):  $R_f$  =0.8.  $^1\text{H}$  NMR (500 MHz,  $\text{CDCl}_3$ )  $\delta$  7.60 (d,  $J$  = 7.2 Hz, 2H), 7.55 (d,  $J$  = 8.4 Hz, 2H), 7.48 (d,  $J$  = 8.4 Hz, 2H), 7.44 (t,  $J$  = 7.7 Hz, 2H), 7.34 (s, 1H), 1.38 (s, 9H).  $^{13}\text{C}$  NMR (125 MHz,  $\text{CDCl}_3$ )  $\delta$  150.2, 141.0, 138.3, 128.7 (2C), 127.0 (2C), 126.9, 126.8 (2C), 125.7 (2C), 34.5, 31.4 (3C).

#### 1,2-Diphenylbenzene (2u)<sup>[14]</sup>

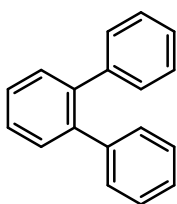

White solid, 90 mg, 78%. m.p. 55-57 °C. TLC (hexane):  $R_f$ =0.5.  $^1\text{H}$  NMR (500 MHz,  $\text{CDCl}_3$ )  $\delta$  7.48 – 7.42 (m, 4H), 7.26 – 7.19 (m, 6H), 7.19 – 7.13 (m, 4H).  $^{13}\text{C}$  NMR (125 MHz,  $\text{CDCl}_3$ )  $\delta$  141.5 (2C), 140.5 (2C), 130.6 (2C), 129.9 (4C), 127.8 (4C), 127.5 (2C), 126.4 (2C).

#### Naphthalene (2v)<sup>[15]</sup>

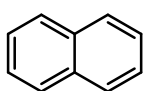

White solid, 54 mg, 85%. m.p. 78-80 °C. TLC (hexane):  $R_f$ =0.6.  $^1\text{H}$  NMR (500 MHz,  $\text{CDCl}_3$ )  $\delta$  7.85 (dd,  $J$  = 6.2, 3.3 Hz, 4H), 7.49 (dd,  $J$  = 6.3, 3.2 Hz, 4H).  $^{13}\text{C}$  NMR (125 MHz,  $\text{CDCl}_3$ )  $\delta$  133.4 (2C), 127.9 (4C), 125.8 (4C).

#### 2-Methoxynaphthalene(2w)<sup>[15]</sup>

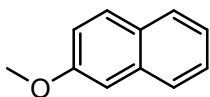

White solid, 44 mg, 56%. m.p. 70-72 °C. TLC (hexane):  $R_f$  =0.6.  $^1\text{H}$  NMR (500

MHz, CDCl<sub>3</sub>)  $\delta$  7.80 – 7.72 (m, 3H), 7.48 – 7.41 (m, 1H), 7.37 – 7.31 (m, 1H), 7.18 – 7.13 (m, 2H), 3.93 (s, 3H). <sup>13</sup>C NMR (125 MHz, CDCl<sub>3</sub>)  $\delta$  157.6, 134.5, 129.4, 128.9, 127.6, 126.7, 126.4, 123.6, 118.7, 105.7, 55.3.

#### 1-Naphthonitrile (2x)<sup>[15]</sup>

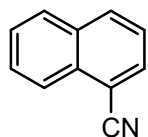

White solid, 50 mg, 65%. m.p. 36-38 °C. TLC (Hexane/ethyl acetate=3/1): R<sub>f</sub>=0.7. <sup>1</sup>H NMR (500 MHz, CDCl<sub>3</sub>)  $\delta$  8.24 (dd, *J* = 8.4, 1.2 Hz, 1H), 8.08 (d, *J* = 8.3 Hz, 1H), 7.95 – 7.89 (m, 2H), 7.73 – 7.66 (m, 1H), 7.66 – 7.59 (m, 1H), 7.56 – 7.49 (m, 1H). <sup>13</sup>C NMR (125 MHz, CDCl<sub>3</sub>)  $\delta$

133.3, 132.9, 132.6, 132.3, 128.6, 128.6, 127.5, 125.1, 124.9, 117.8, 110.2.

#### 2-Naphthonitrile (2y)<sup>[16]</sup>

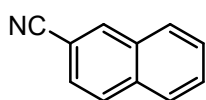

White solid, 47 mg, 61%. m.p. 63-35 °C. TLC (Hexane/ethyl acetate=3/1): R<sub>f</sub>=0.7.

<sup>1</sup>H NMR (500 MHz, CDCl<sub>3</sub>)  $\delta$  8.22 (s, 1H), 7.93 – 7.86 (m, 3H), 7.68 – 7.57 (m, 3H). <sup>13</sup>C NMR (125 MHz, CDCl<sub>3</sub>)  $\delta$  134.6, 134.1, 132.2, 129.1, 129.0, 128.4, 128.0, 127.6, 126.3, 119.2, 109.3.

#### 4-Phenylpyridine (2z)<sup>[12]</sup>

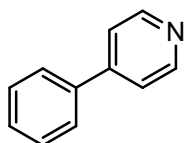

White solid, 72 mg, 93%. m.p. 69-71 °C. TLC (Hexane/ethyl acetate=20/1): R<sub>f</sub>=0.7.

<sup>1</sup>H NMR (500 MHz, CDCl<sub>3</sub>)  $\delta$  8.73 – 8.65 (m, 2H), 7.70 – 7.64 (m, 2H), 7.57 – 7.43 (m, 5H). <sup>13</sup>C NMR (125 MHz, CDCl<sub>3</sub>)  $\delta$  148.3, 148.2, 137.7, 136.6, 134.4, 129.0

(2C), 128.1, 127.1 (2C), 123.5.

#### 4-(4-Chlorophenyl)pyridine (2aa)<sup>[17]</sup>

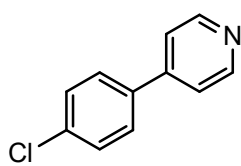

Viscous liquid, 71 mg, 75%. TLC (Hexane/ethyl acetate=1/1): R<sub>f</sub> =0.5. <sup>1</sup>H

NMR (500 MHz, CDCl<sub>3</sub>)  $\delta$  8.66 (d, *J* = 5.9 Hz, 2H), 7.58 – 7.54 (m, 2H), 7.49 – 7.42 (m, 4H). <sup>13</sup>C NMR (125 MHz, CDCl<sub>3</sub>)  $\delta$  149.8 (2C), 147.7, 136.3, 135.5,

129.4 (2C), 128.3 (2C), 121.6 (2C).

#### 4-(4-ethynylphenyl)pyridine (2ab)<sup>[18]</sup>

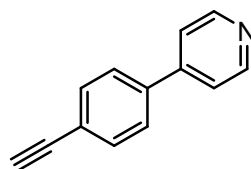

Light yellow solid, 45 mg, 51%. m.p.183-185 °C. TLC (Hexane/ethyl

acetate=2/1): R<sub>f</sub>=0.5. <sup>1</sup>H NMR (500 MHz, CDCl<sub>3</sub>)  $\delta$  8.68 (d, *J* = 5.3 Hz, 2H),

7.61 (s, 4H), 7.54 – 7.51 (m, 2H), 3.19 (s, 1H). <sup>13</sup>C NMR (125 MHz, CDCl<sub>3</sub>)

$\delta$  149.9 (2C), 147.8, 138.2, 132.9 (2C), 126.9 (2C), 123.1, 121.6 (2C), 83.0, 78.9.

#### 1,2-Diphenylethene (2ac)<sup>[12]</sup>

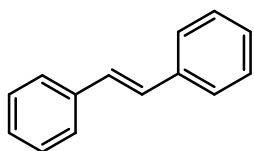

White solid, 74 mg, 82%. m.p. 122-125 °C. TLC (Hexane/ethylacetate=100/1):

$R_f=0.7$ .  $^1\text{H NMR}$  (500 MHz,  $\text{CDCl}_3$ )  $\delta$  7.56 – 7.51 (m, 4H), 7.37 (dd,  $J = 8.4$ , 7.0 Hz, 4H), 7.30 – 7.27 (m, 2H), 7.13 (s, 2H).  $^{13}\text{C NMR}$  (125 MHz,  $\text{CDCl}_3$ )  $\delta$

137.3 (2C), 128.7 (6C), 127.6 (2C), 126.5 (4C).

#### Benzophenone (2ad)<sup>[19]</sup>

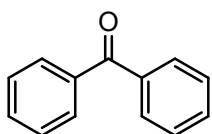

White solid, 53 mg, 58%. m.p. 52-54 °C. TLC (Hexane/ethyl acetate=20/1):  $R_f$

$=0.6$ .  $^1\text{H NMR}$  (500 MHz,  $\text{CDCl}_3$ )  $\delta$  7.86 – 7.77 (m, 4H), 7.62 – 7.56 (m, 2H),

7.53 – 7.44 (m, 4H).  $^{13}\text{C NMR}$  (125 MHz,  $\text{CDCl}_3$ )  $\delta$  196.8, 137.6 (2C), 132.4 (2C),

130.1 (4C), 128.3 (4C).

#### 4-benzoylbenzonitrile (2ae)<sup>[19]</sup>

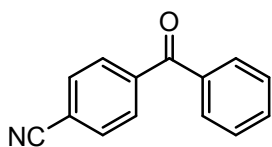

White solid, 57 mg, 55%. m.p. 110-112 °C. TLC (Hexane/ethyl acetate=10/1):

$R_f=0.6$ .  $^1\text{H NMR}$  (500 MHz,  $\text{CDCl}_3$ )  $\delta$  7.88 (d,  $J = 8.3$  Hz, 2H), 7.84 – 7.76

(m, 4H), 7.67 – 7.62 (m, 1H), 7.52 (t,  $J = 7.7$  Hz, 2H).  $^{13}\text{C NMR}$  (125 MHz,

$\text{CDCl}_3$ )  $\delta$  195.0, 141.2, 136.3, 133.3, 132.2 (2C), 130.2 (2C), 130.1 (2C), 128.6 (2C), 118.0, 115.6.

#### *p*-Cymene (2af)<sup>[20]</sup>

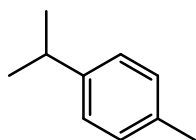

Colorless liquid, 45mg, 73%. TLC (hexane):  $R_f=0.6$ .  $^1\text{H NMR}$  (500 MHz,  $\text{CDCl}_3$ )

$\delta$  7.19 – 7.08 (m, 4H), 2.89 (s, 1H), 2.34 (s, 3H), 1.26 (d,  $J = 6.9$  Hz, 6H).  $^{13}\text{C NMR}$

(125 MHz,  $\text{CDCl}_3$ )  $\delta$  145.9, 135.2, 129.0 (2C), 126.3 (2C), 33.7, 24.1 (2C), 21.0.

#### 4-isopropylbenzaldehyde (2ag)<sup>[20]</sup>

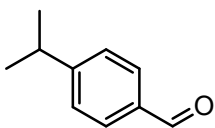

Colorless liquid, 27 mg, 38%. TLC (Hexane/ethyl acetate=20/1):  $R_f=0.7$ .  $^1\text{H}$

NMR (500 MHz,  $\text{CDCl}_3$ )  $\delta$  9.97 (s, 1H), 7.85 – 7.78 (m, 2H), 7.41 – 7.36 (m,

2H), 3.03 – 2.93 (m, 1H), 1.28 (d,  $J = 6.8$  Hz, 6H).  $^{13}\text{C NMR}$  (125 MHz,  $\text{CDCl}_3$ )

$\delta$  192.0, 156.2, 134.5, 130.0 (2C), 127.1 (2C), 34.5, 23.6 (2C).

#### (4-Butylcyclohexyl)-4-ethylbenzene (2ah)

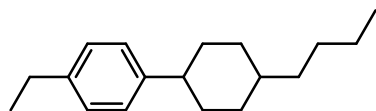

Yellow oil liquid, 90 mg, 78%. TLC (hexane):  $R_f=0.5$ .  $^1\text{H NMR}$  (500

MHz,  $\text{CDCl}_3$ )  $\delta$  7.14 (s, 4H), 2.63 (q,  $J = 7.6$  Hz, 2H), 2.44 (tt,  $J =$

12.3, 3.2 Hz, 1H), 1.88 (t,  $J = 11.8$  Hz, 4H), 1.45 (qd,  $J = 13.8, 13.2, 3.5$  Hz, 2H), 1.31 (dt,  $J = 6.6,$

3.6 Hz, 5H), 1.24 (t,  $J = 7.6$  Hz, 5H), 1.11 – 1.00 (m, 2H), 0.91 (t,  $J = 7.0$  Hz, 3H).  $^{13}\text{C NMR}$  (125

MHz,  $\text{CDCl}_3$ )  $\delta$  145.1, 141.5, 127.7 (2C), 126.7 (2C), 44.2, 37.3, 37.1, 34.4 (2C), 33.7 (2C), 29.2,

28.4, 23.0, 15.6, 14.2. ESI-HRMS ( $m/z$ )  $[\text{M}+\text{H}]^+$  calcd for  $\text{C}_{18}\text{H}_{29}$ , 245.2264, found: 245.2258.



### Methyl(2,3,4,5-tetrahydro-[1,1'-biphenyl]-2-yl)sulfane (4a)

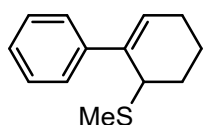

Yellow oil liquid, 23 mg, 22%. TLC (hexane):  $R_f=0.6$ .  $^1\text{H NMR}$  (500 MHz,  $\text{CDCl}_3$ )  $\delta$  7.46 – 7.41 (m, 2H), 7.36 – 7.30 (m, 2H), 7.28 – 7.24 (m, 1H), 6.13 – 6.07 (m, 1H), 3.81 (s, 1H), 2.30 – 2.21 (m, 2H), 2.15 – 2.11 (m, 1H), 2.05 (s, 3H), 2.04 – 1.94 (m, 2H), 1.76 – 1.68 (m, 1H).  $^{13}\text{C NMR}$  (125 MHz,  $\text{CDCl}_3$ )  $\delta$  141.4, 137.3, 128.7, 128.2 (2C), 126.9, 125.9 (2C), 44.0, 28.7, 25.8, 17.6, 15.4. ESI-HRMS ( $m/z$ )  $[\text{M}+\text{Na}]^+$  calcd for  $\text{C}_{13}\text{H}_{16}\text{NaS}$ , 227.0870, found: 227.0875.

### 2,3,4,5-Tetrahydro-[1,1'-biphenyl]-2-ol (4b)

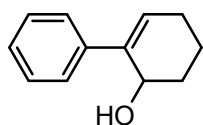

Yellow oil liquid. TLC (Hexane/ethyl acetate=20/1):  $R_f=0.5$ .  $^1\text{H NMR}$  (500 MHz,  $\text{CDCl}_3$ )  $\delta$  7.51 – 7.43 (m, 2H), 7.37 – 7.32 (m, 2H), 7.28 – 7.23 (m, 1H), 6.20 – 6.14 (m, 1H), 4.79 – 4.67 (m, 1H), 2.32 – 2.23 (m, 1H), 2.22 – 2.13 (m, 1H), 2.00 – 1.94 (m, 1H), 1.90 – 1.84 (m, 1H), 1.83 – 1.75 (m, 1H), 1.72 – 1.66 (m, 1H).  $^{13}\text{C NMR}$  (125 MHz,  $\text{CDCl}_3$ )  $\delta$  140.2, 139.1, 128.8, 128.6 (2C), 127.1, 126.0 (2C), 65.5, 31.6, 26.1, 17.4. ESI-HRMS ( $m/z$ )  $[\text{M}+\text{K}]^+$  calcd for  $\text{C}_{12}\text{H}_{14}\text{OK}$ , 213.0676, found: 213.0671.

## References

- (1) X. Wu, J. Zhou, Selective Arylation at the Vinylic Site of Cyclic Olefins, *Chem. Commun.*, 2013, **49**, 4794-4796.
- (2) B. Lim, B. Jung, C. Cho, Ene-hydrazide from Enol Triflate for the Regioselective Fischer Indole Synthesis, *Org. Lett.*, 2014, **16**, 4492–4495.
- (3) Y. Liu, S. Battaglioli, L. Lombardi, A. Menichetti, G. Valenti, M. Montalti, M. Bandini, Visible-Light Photoredox Catalyzed Dehydrogenative Synthesis of Allylic Carboxylates from Styrenes, *Org. Lett.*, 2021, **23**, 4441–4446.
- (4) A. Yanagusawa, T. Nezu, S. Mohri, Brønsted Acid-Promoted Hydrocyanation of Arylalkenes, *Org. Lett.*, 2009, **11**, 5286-5289.
- (5) C. Ting, Y. Hsu, R. Liu, Gold-catalyzed isomerization of unactivated allenes into 1,3-dienes under ambient conditions, *Chem. Commun.*, 2012, **48**, 6577-6579.

- (6) A. Ilie, G. D. Roiban, M. T. Reetz, Di-*tert*-butyl N,N-diethylphosphoramidite as an Air Stable Ligand for Suzuki-Miyaura and Buchwald-Hartwig Reactions, *ChemistrySelect*, 2017, **2**, 1392-1397.
- (7) N. Yasukawa, H. Yokoyama, M. Masuda, Y. Monguchi, H. Sajiki, Y. Sawama, Highly-functionalized arene synthesis based on palladium on carbon-catalyzed aqueous dehydrogenation of cyclohexadienes and cyclohexenes, *Green Chem.*, 2018, **20**, 1213-1217.
- (8) M. Tomohiro, K. Yoshiaki, S. Satoko, U. Takahiro, S. Ai, T. Asami, K. Yusuke, E. Koichi, B. Utpal, K. Takanori, K. Atsushi, M. Yasunari, S. Hironao, Heterogeneous Pd/C-Catalyzed Ligand-Free, Room-Temperature Suzuki-Miyaura Coupling Reactions in Aqueous Media, *Chem. Eur. J.*, 2007, **13**, 5937-5943.
- (9) S. Hong, L. Liang, Aqueous Suzuki Couplings Mediated by a Hydrophobic Catalyst. *RSC Adv.*, 2022, **12**, 28862-28866.
- (9) P. Y. Choy, O. Y. Yuen, M. P. Leung, W. K. Chow, F. Y. Kwong, A Highly Efficient Monophosphine Ligand for Parts per Million Levels Pd-Catalyzed Suzuki-Miyaura Coupling of (Hetero)Aryl Chlorides, *Eur. J. Org. Chem.*, 2020, **19**, 2846-2853.
- (10) J. Zhu, V. N. G. Lindsay, Benzimidazolyl Palladium Complexes as Highly Active and General Bifunctional Catalysts in Sustainable Cross-Coupling Reactions, *ACS Catal.*, 2019, **9**, 6993-6998.
- (11) S. Yang, H. Li, X. Yu, J. An, M. Szostak, Suzuki-Miyaura Cross-Coupling of Aryl Fluorosulfonates Mediated by Air- and Moisture-stable [Pd(NHC)( $\mu$ -Cl)Cl]<sub>2</sub> Precatalysts: Broad Platform for C-O Cross-Coupling of Stable Phenolic Electrophiles, *J. Org. Chem.*, 2022, **87**, 15250-1526.
- (12) L. Tang, Y. Zang, W. Guo, Z. Han, H. Huang, J. Sun, Reductive Opening of Oxetanes Catalyzed by Frustrated Lewis Pairs: Unexpected Aryl Migration via Neighboring Group Participation, *Org. Lett.*, 2022, **24**, 3259-3264.
- (13) G. Wang, Z. Wu, Y. Liang, W. Liu, H. Zhan, M. Song, Y. Sun, Exploring the Coordination Confinement Effect of Divalent Palladium/zero Palladium Doped polyaniline-networking: As an Excellent-performance Nanocomposite Catalyst for C-C Coupling Reactions, *J. Catal.*, 2020, **384**, 177-188.

- (14) X. Zhang, L. Xu, X. Wang, N. Ma, F. Sun, Dehydrogenative Aromatization of Saturated Aromatic Compounds by Graphite Oxide and Molecular Sieves, *Chin. J. Chem.*, 2012, **30**, 1525-1530.
- (15) S. Enthaler, S. Inoue, An Efficient Zinc-Catalyzed Dehydration of Primary Amides to Nitriles. *Chem. Asian. J.*, 2012, **7**, 169–175.
- (16) J. Li, C. Huang, D. Wen, Q. Zheng, B. Tu, T. Tu, Nickel-Catalyzed Amination of Aryl Chlorides with Amides, *Org. Lett.*, 2021, **23**, 687-691.
- (17) R. Chen, Q. Weng, Z. An, S. Zhu, Q. Wang, X. Chen, Investigation of 4-Pyridyl Liquid Crystals on the Photovoltaic Performance and Stability of Dye Sensitized Solar Cells by the Co-Sensitization, *Dyes Pigm.*, 2018, **159**, 527–532.
- (18) T. Patra, S. Agasti, A. Modak, D. Maiti, Nickel-catalyzed Hydrogenolysis of Unactivated Carbon-Cyano Bonds, *Chem. Commun.*, 2013, **49**, 8362–8364.
- (19) X. Li, F. Bai, C. Liu, X. Ma, C. Gu, B. Dai, Selective Electrochemical Oxygenation of Alkylarenes to Carbonyls, *Org. Lett.*, 2021, **23**, 7445-7449.
- (20) V. F. Petrov, A. I. Pavluchenko, Study of Some Liquid Crystalline 2,5-Disubstituted Pyridine Derivatives, *Mol. Cryst. Liq. Cryst.*, 2002, **383**, 63-79.

## 5. $^1\text{H}$ NMR and $^{13}\text{C}$ NMR spectra for products

$^1\text{H}$  NMR (500 MHz,  $\text{CDCl}_3$ ) spectrum of compound **1a**

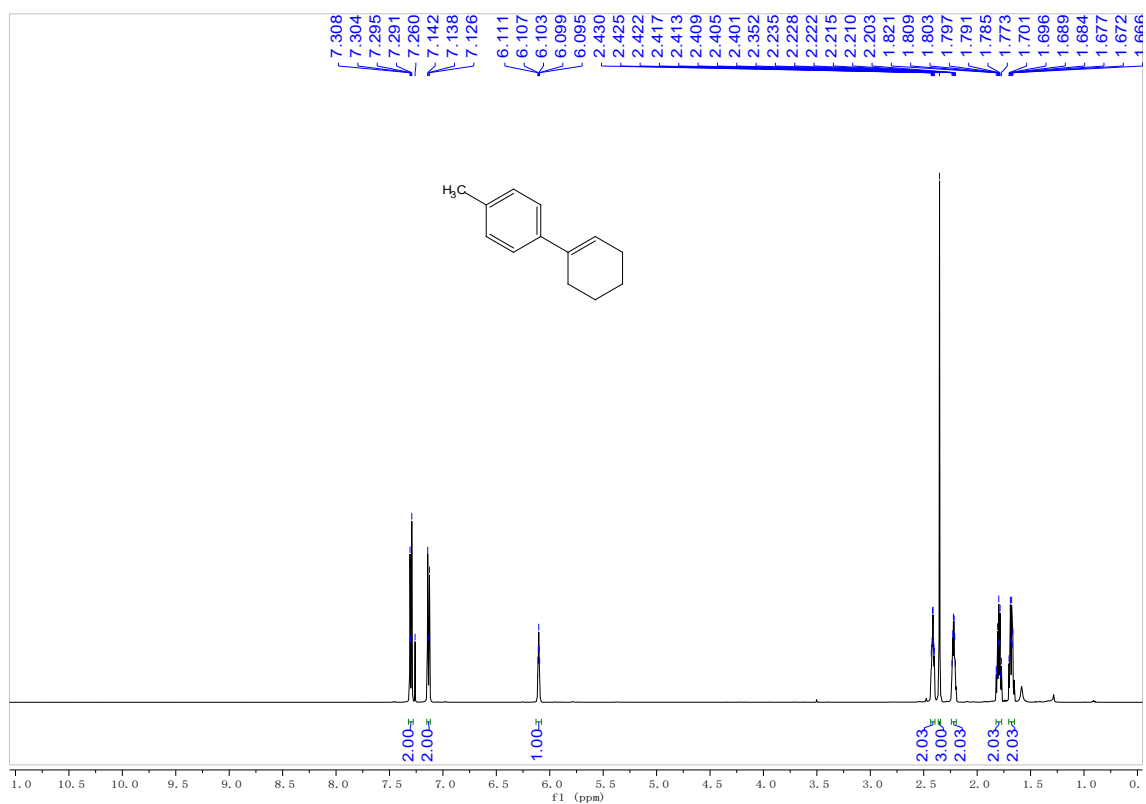

$^{13}\text{C}$  NMR (125 MHz,  $\text{CDCl}_3$ ) spectrum of compound **1a**

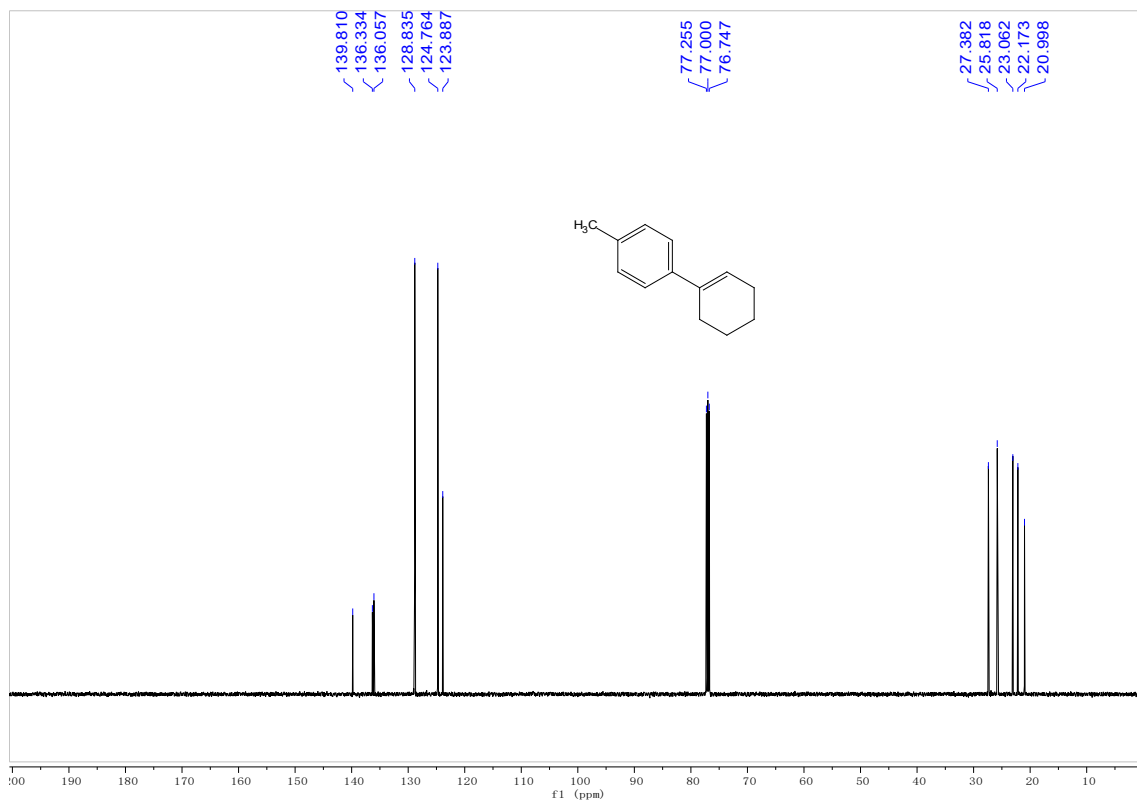

<sup>1</sup>H NMR (500 MHz, CDCl<sub>3</sub>) spectrum of compound **1b**

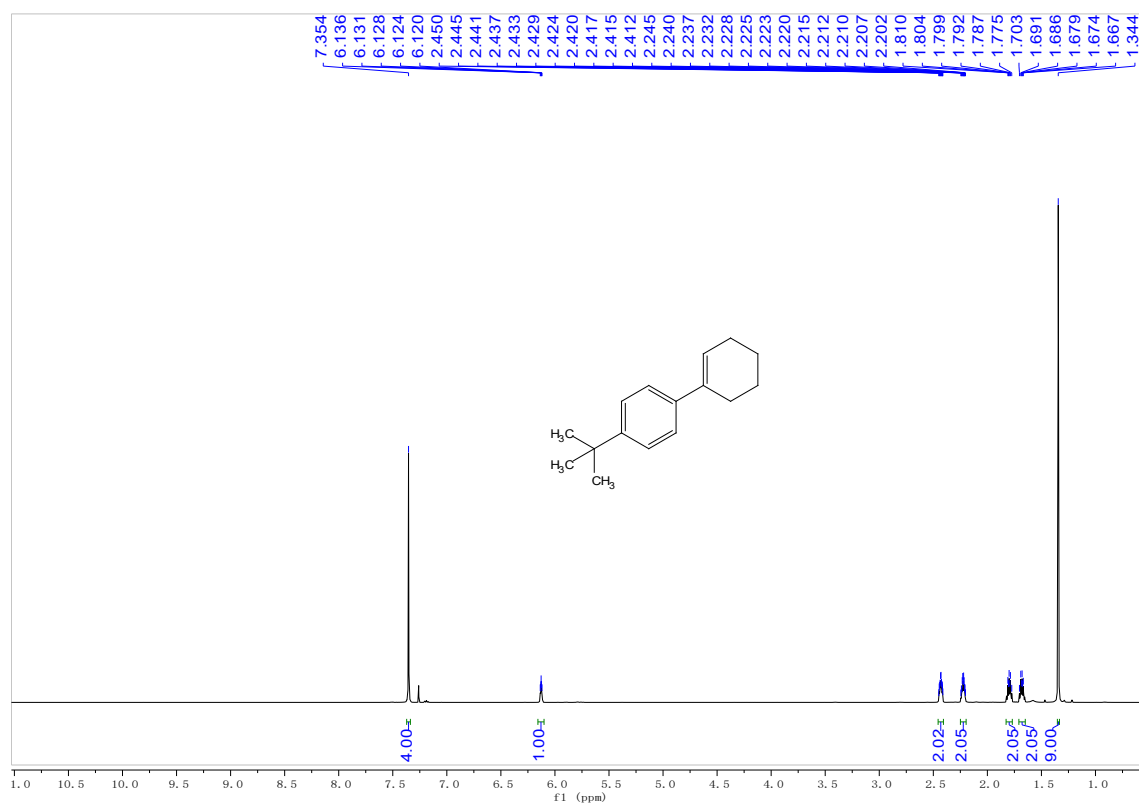

<sup>13</sup>C NMR (125 MHz, CDCl<sub>3</sub>) spectrum of compound **1b**

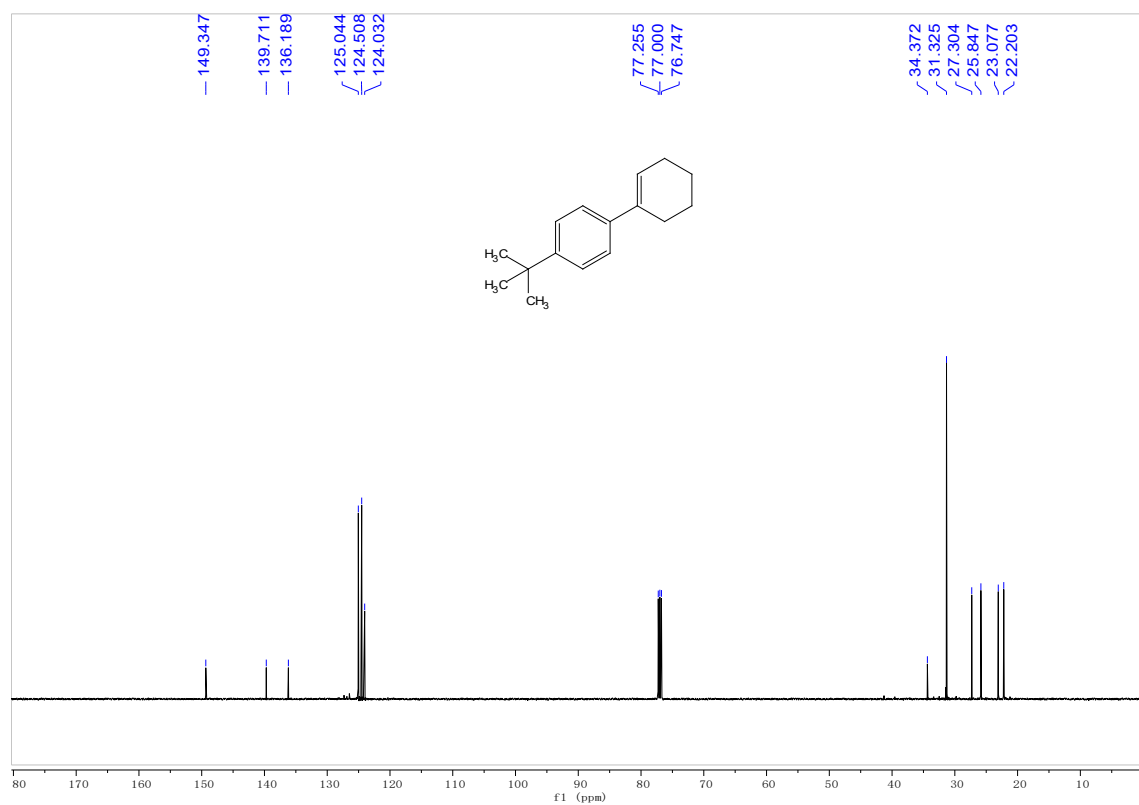

$^1\text{H}$  NMR (500 MHz,  $\text{CDCl}_3$ ) spectrum of compound **1c**

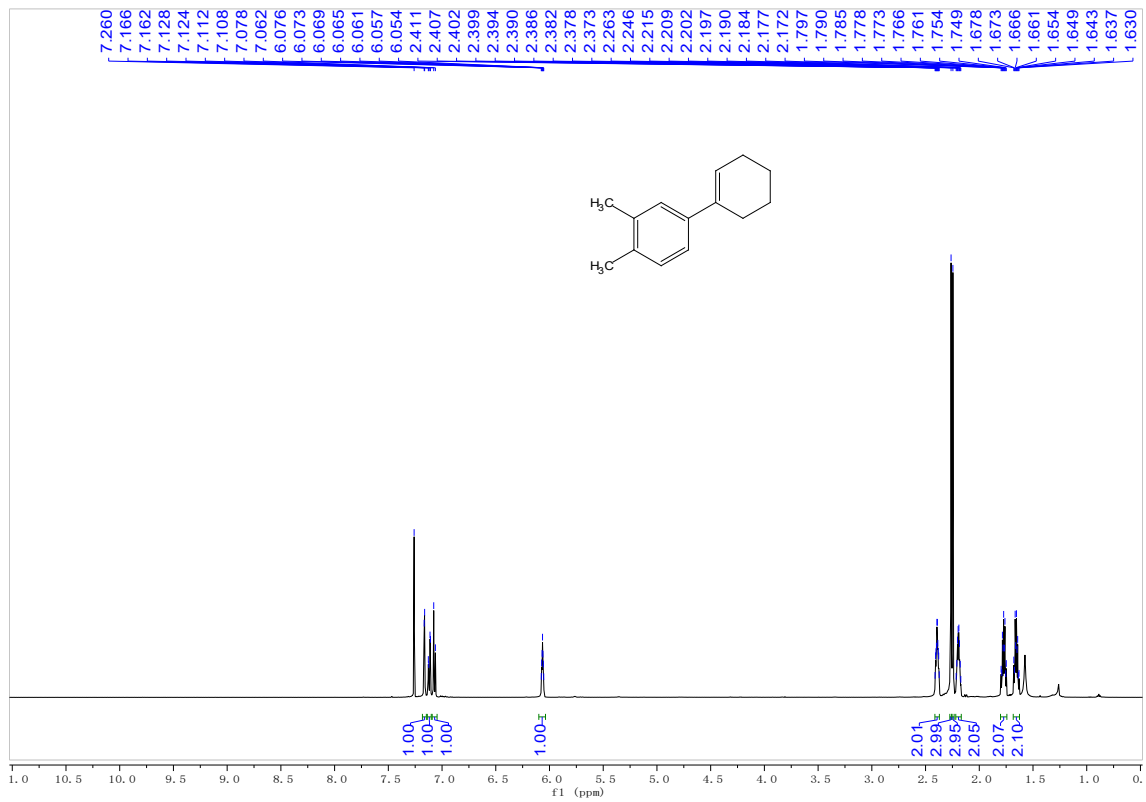

$^{13}\text{C}$  NMR (125 MHz,  $\text{CDCl}_3$ ) spectrum of compound **1c**

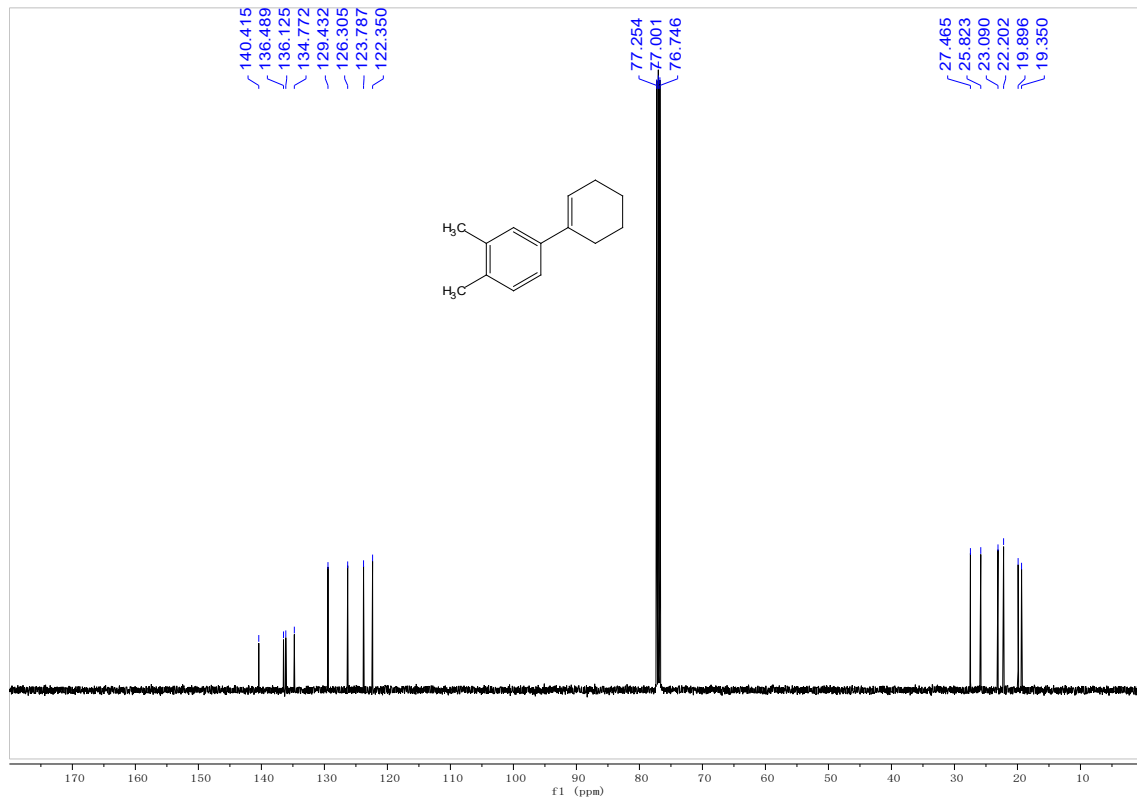

<sup>1</sup>H NMR (500 MHz, CDCl<sub>3</sub>) spectrum of compound **1d**

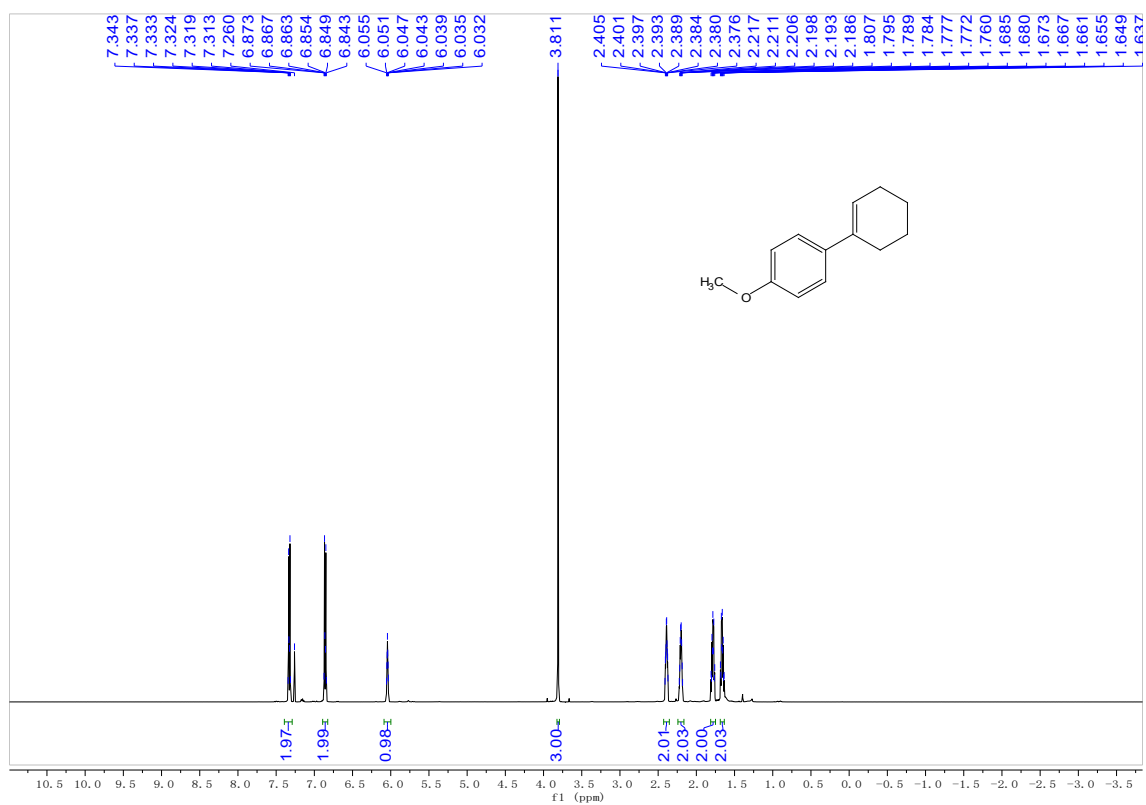

<sup>13</sup>C NMR (125 MHz, CDCl<sub>3</sub>) spectrum of compound **1d**

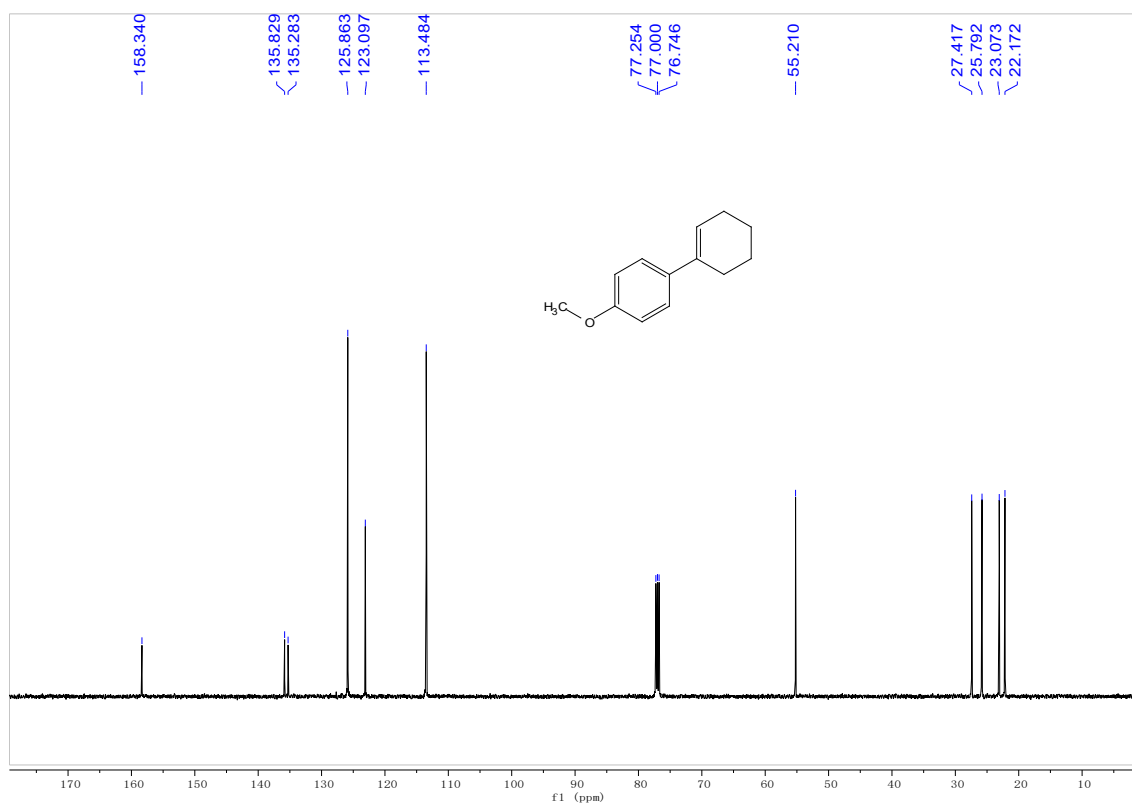

<sup>1</sup>H NMR (500 MHz, CDCl<sub>3</sub>) spectrum of compound **1e**

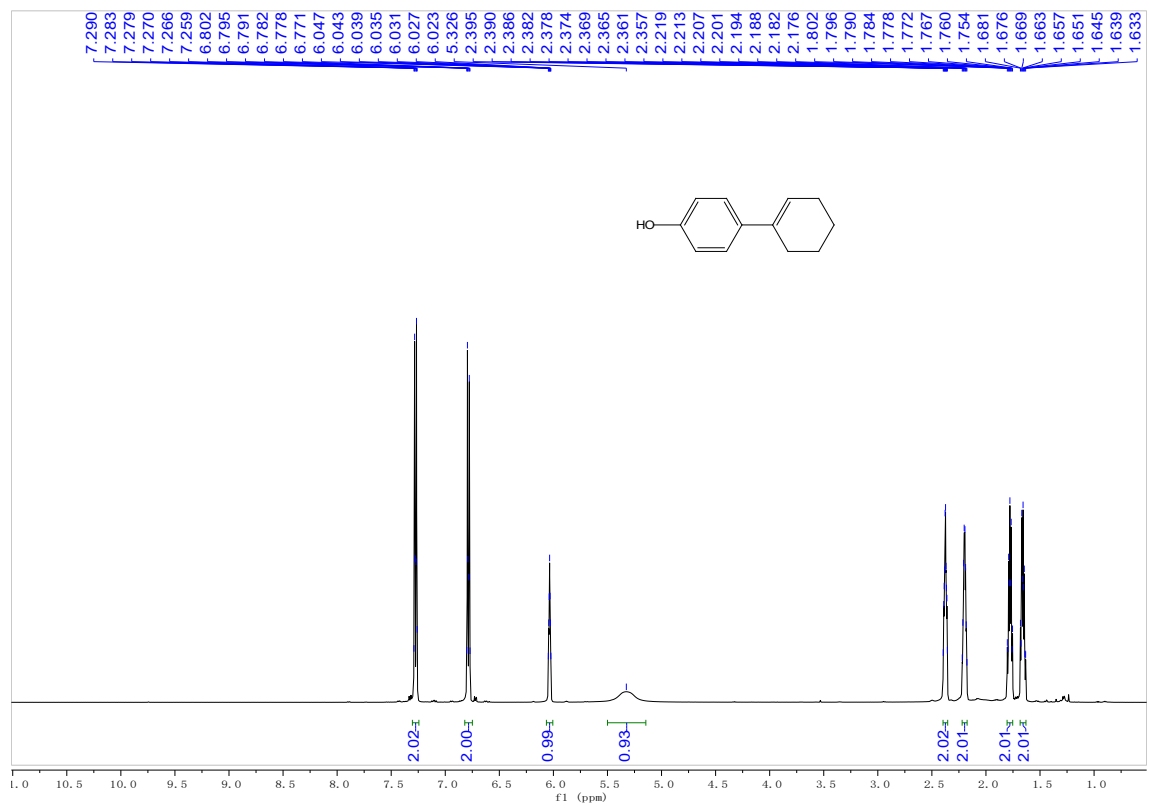

<sup>13</sup>C NMR (125 MHz, CDCl<sub>3</sub>) spectrum of compound **1e**

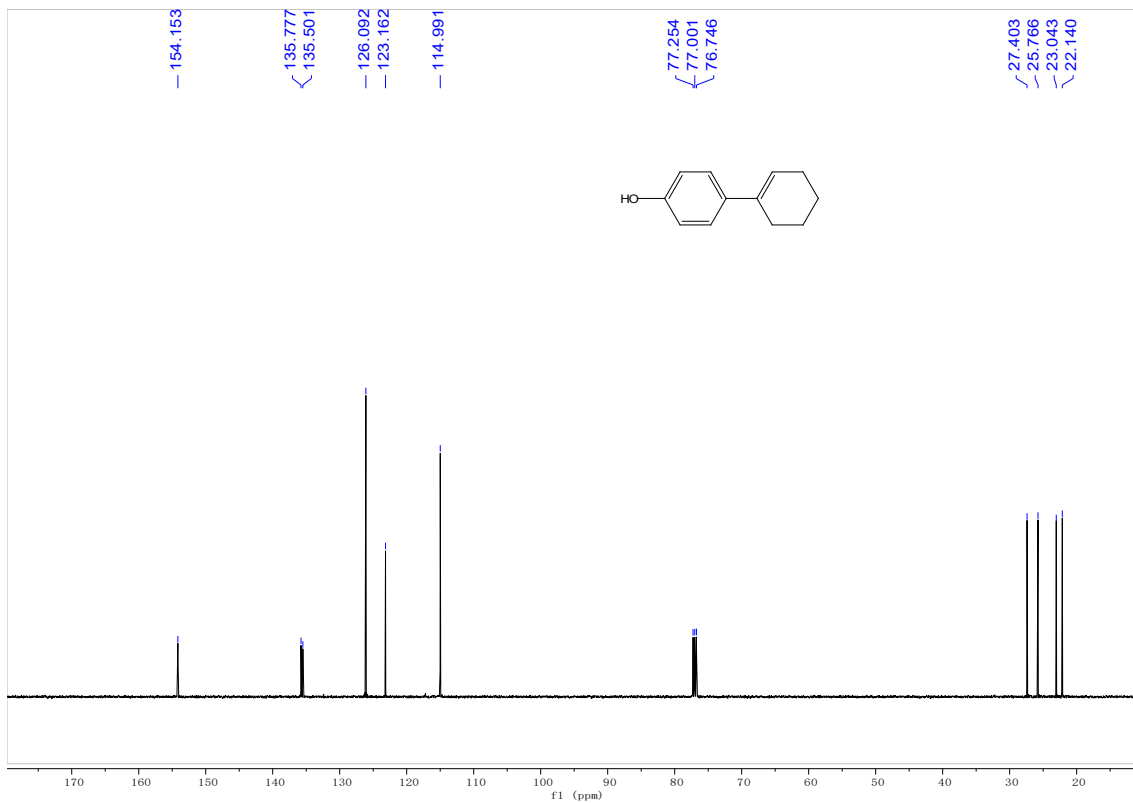



<sup>1</sup>H NMR (500 MHz, CDCl<sub>3</sub>) spectrum of compound **1f**

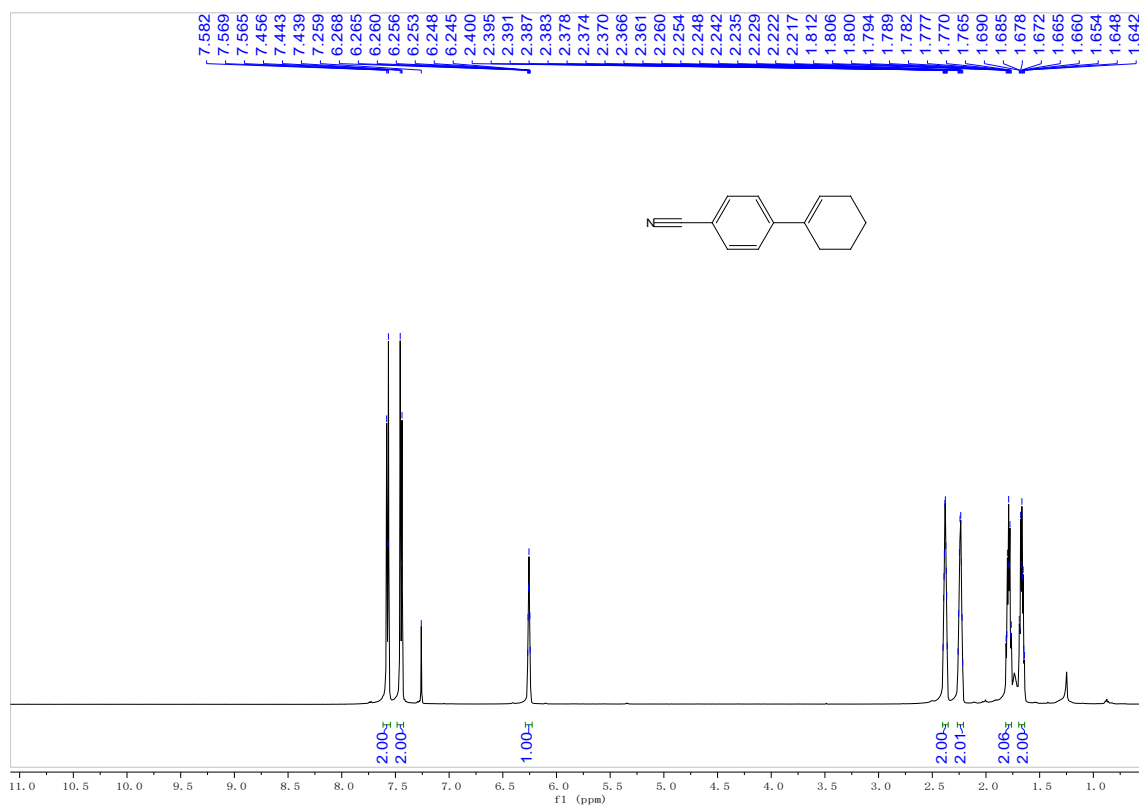

<sup>13</sup>C NMR (125 MHz, CDCl<sub>3</sub>) spectrum of compound **1f**

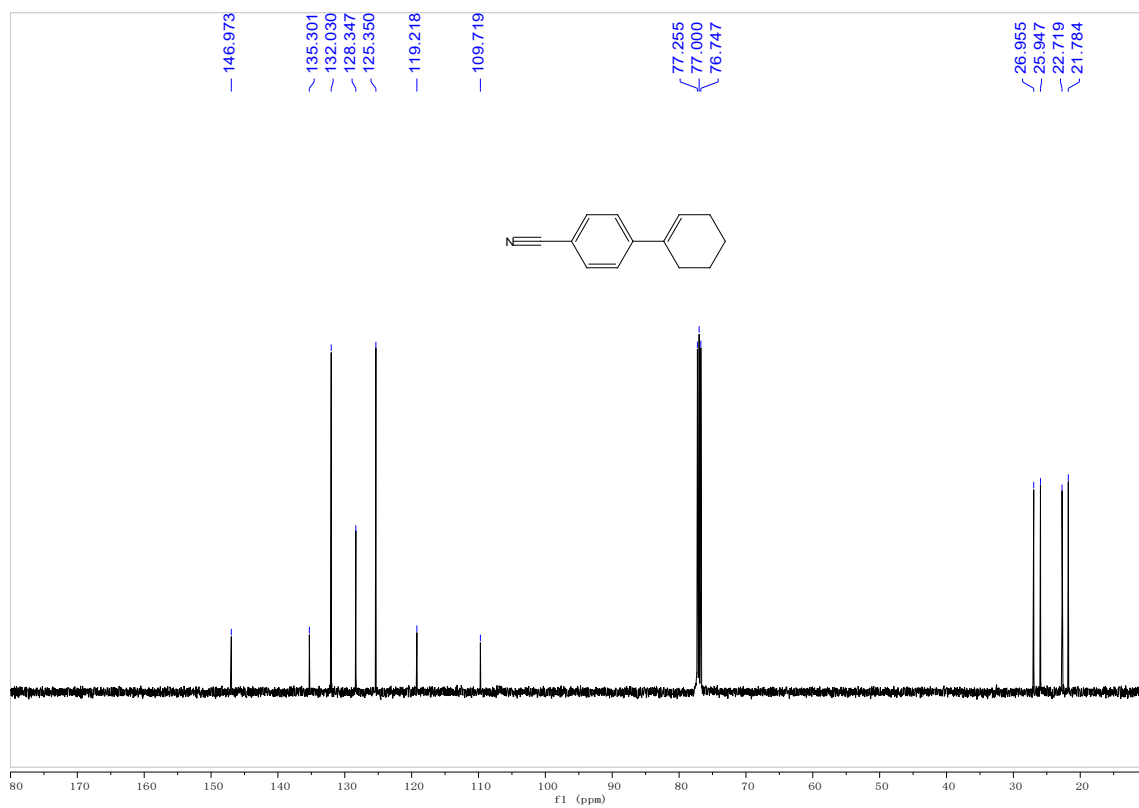

<sup>1</sup>H NMR (500 MHz, CDCl<sub>3</sub>) spectrum of compound **1g**

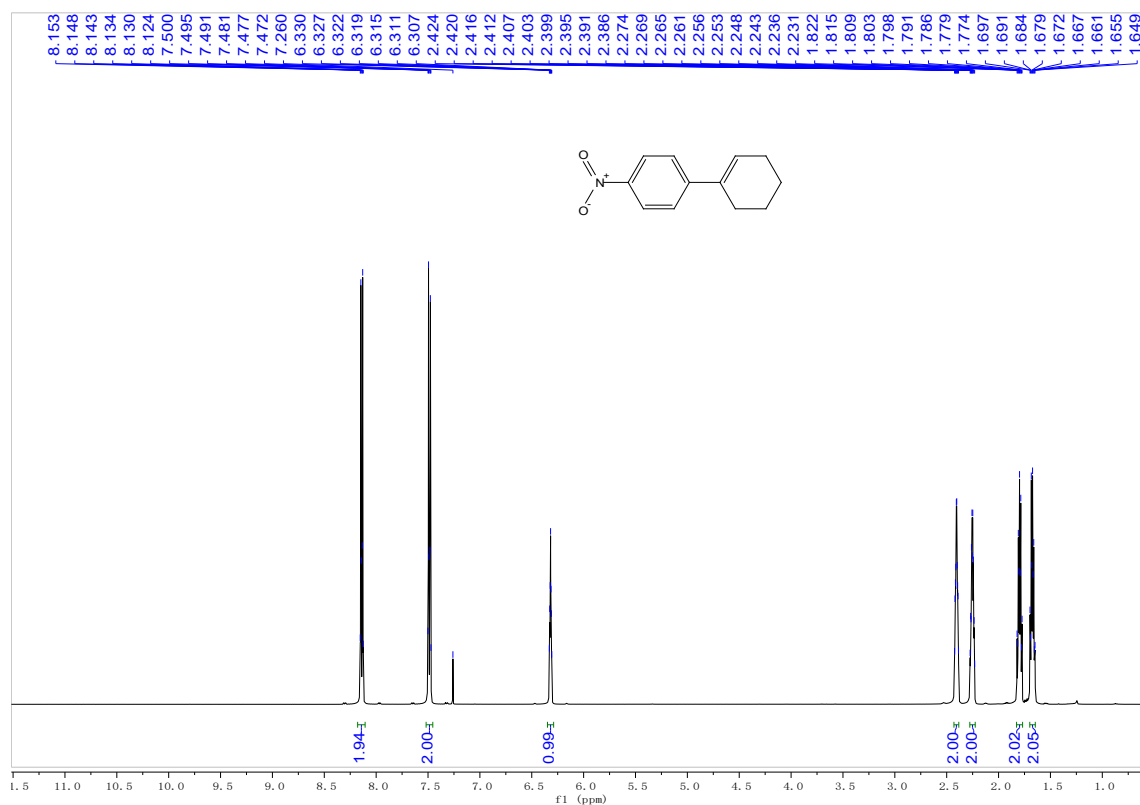

<sup>13</sup>C NMR (125 MHz, CDCl<sub>3</sub>) spectrum of compound **1g**

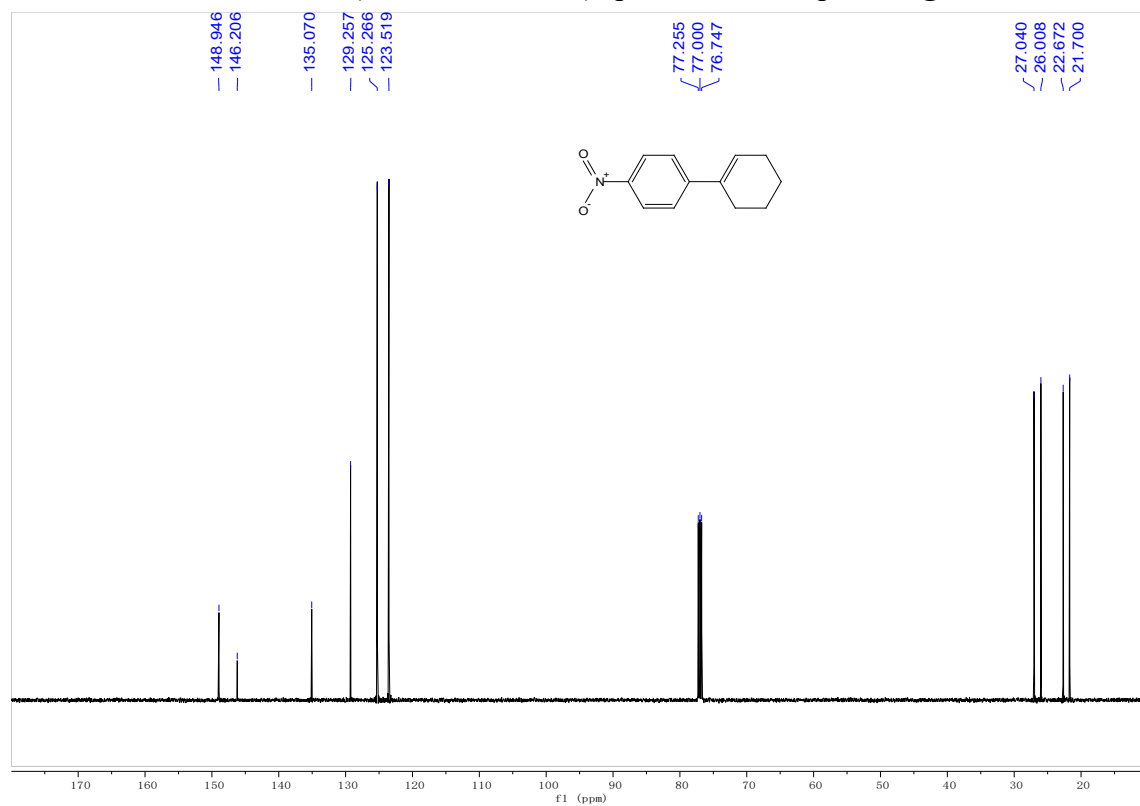

$^1\text{H}$  NMR (500 MHz,  $\text{CDCl}_3$ ) spectrum of compound **1h**

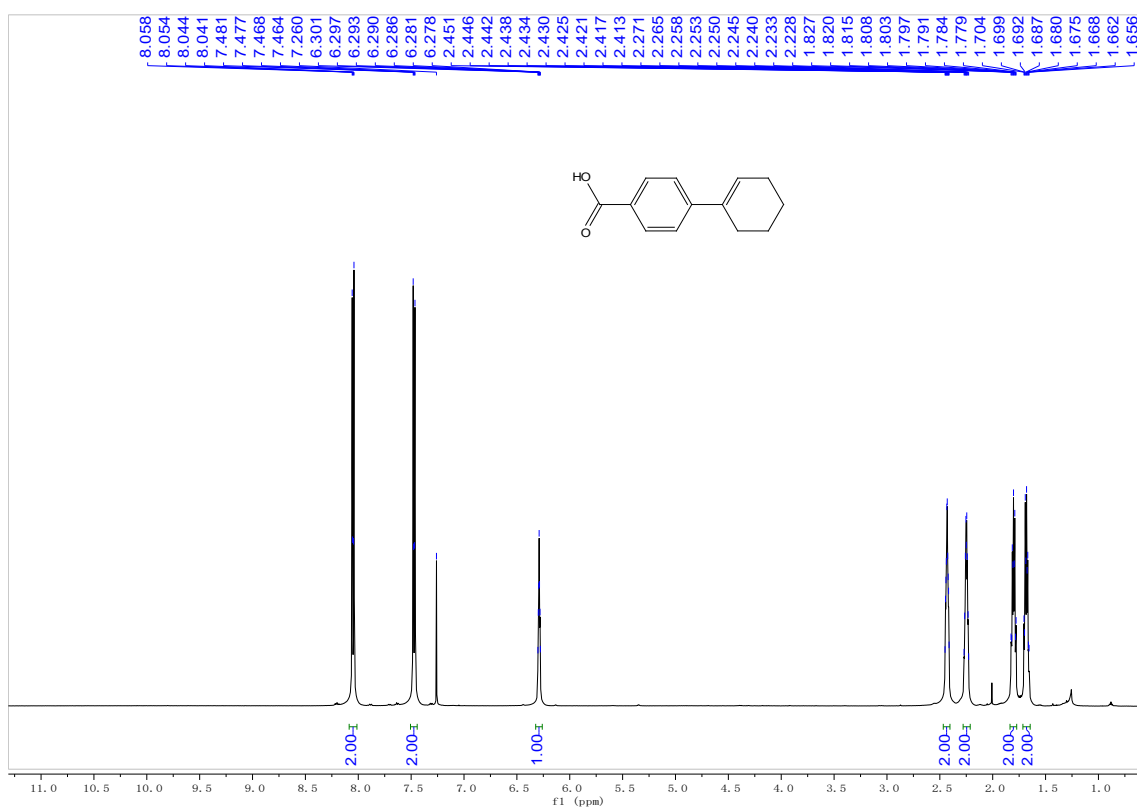

$^{13}\text{C}$  NMR (125 MHz,  $\text{CDCl}_3$ ) spectrum of compound **1h**

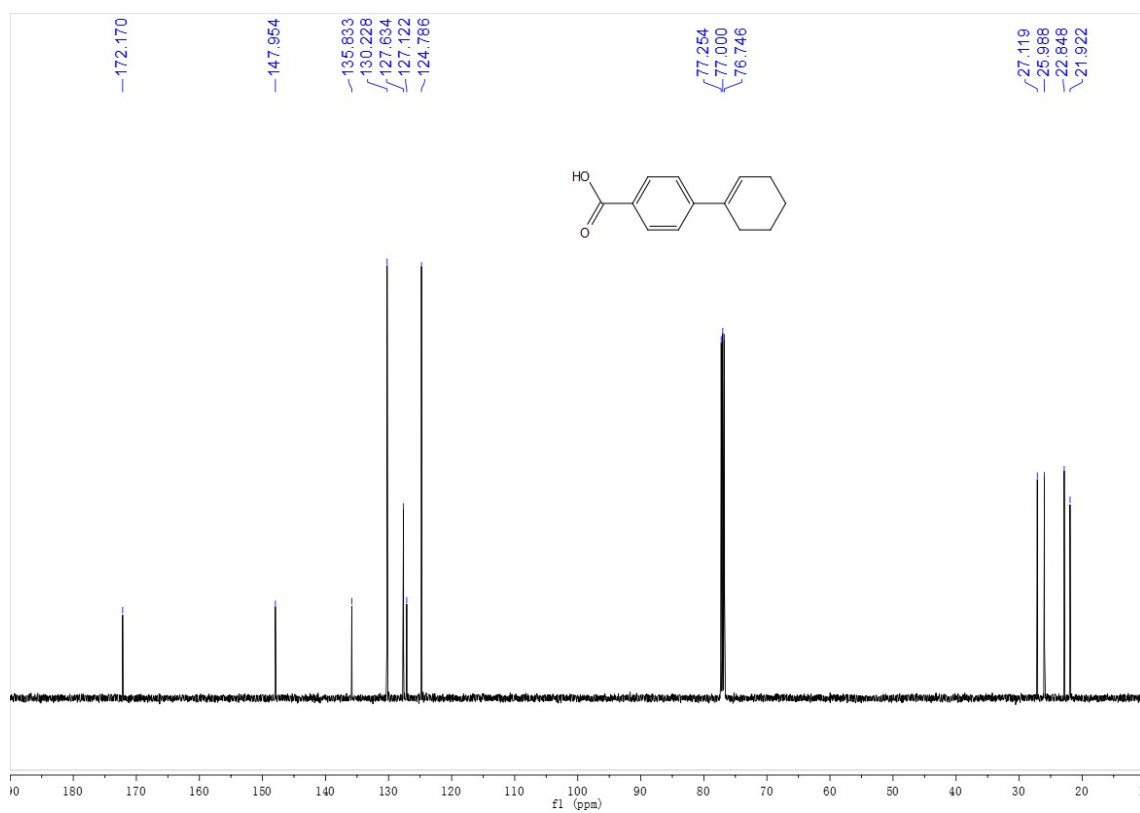

<sup>1</sup>H NMR (500 MHz, CDCl<sub>3</sub>) spectrum of compound **1i**

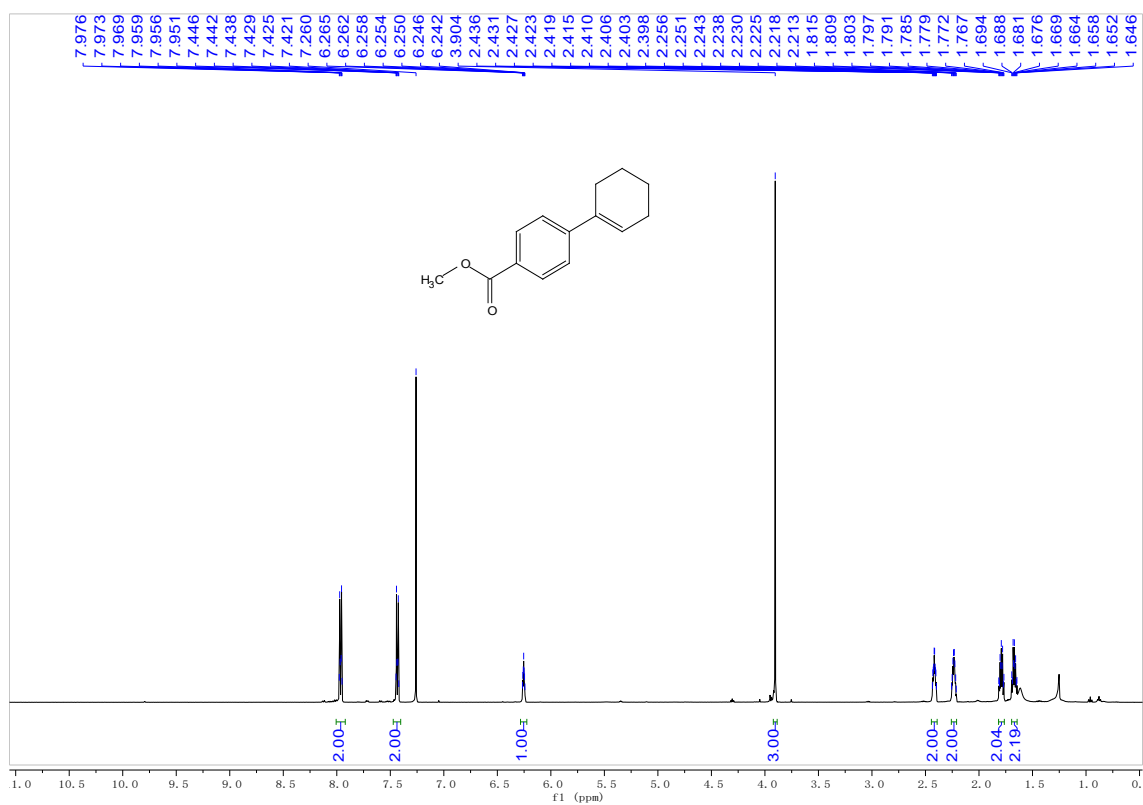

<sup>13</sup>C NMR (125 MHz, CDCl<sub>3</sub>) spectrum of compound **1i**

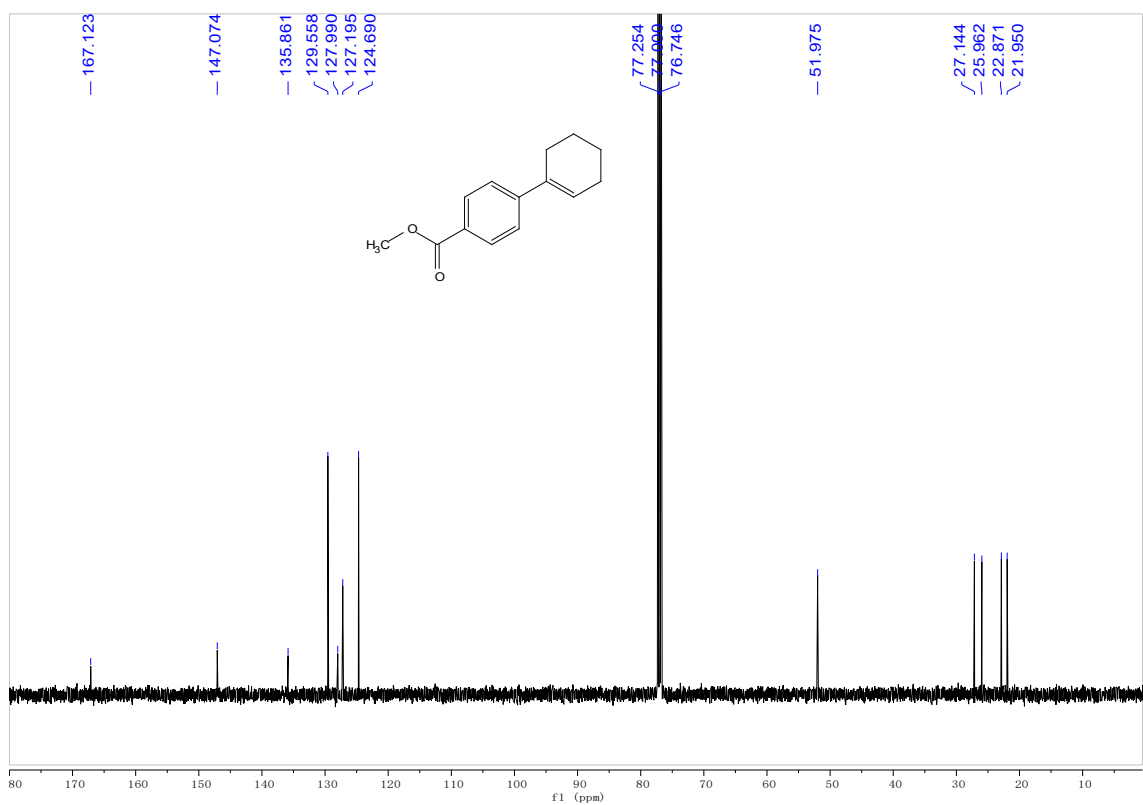

<sup>1</sup>H NMR (500 MHz, CDCl<sub>3</sub>) spectrum of compound **1j**

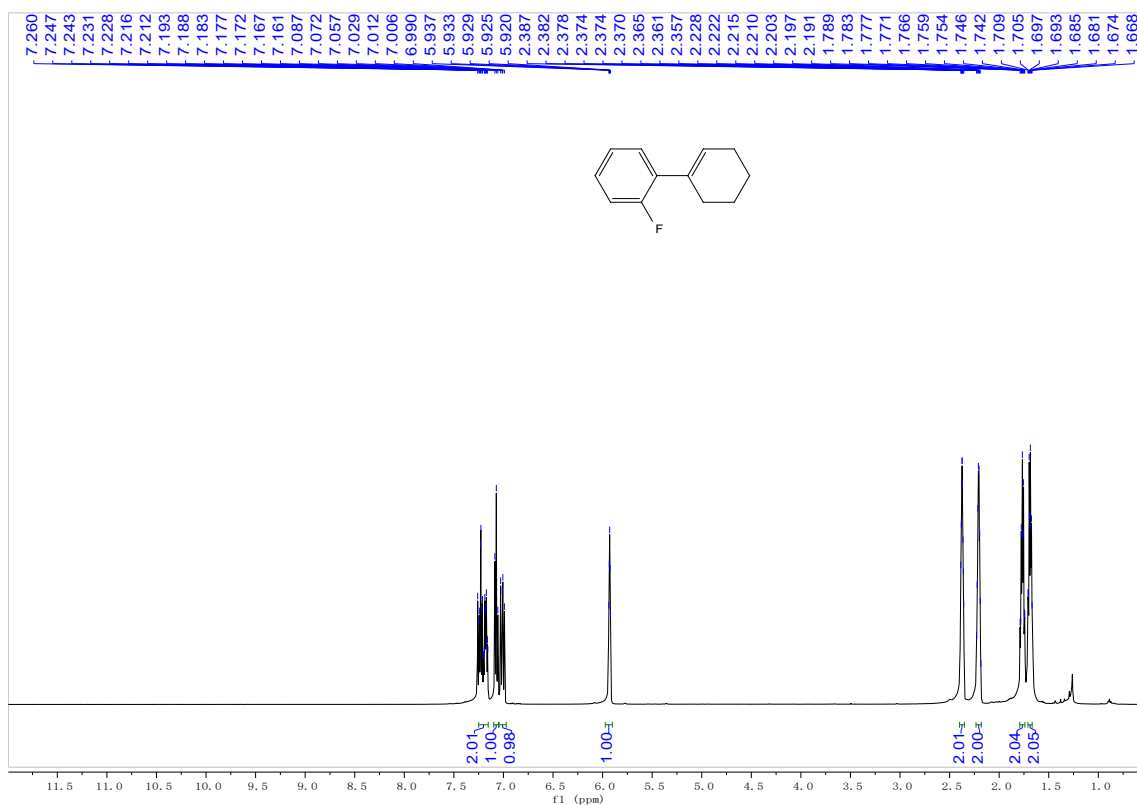

<sup>13</sup>C NMR (125 MHz, CDCl<sub>3</sub>) spectrum of compound **1j**

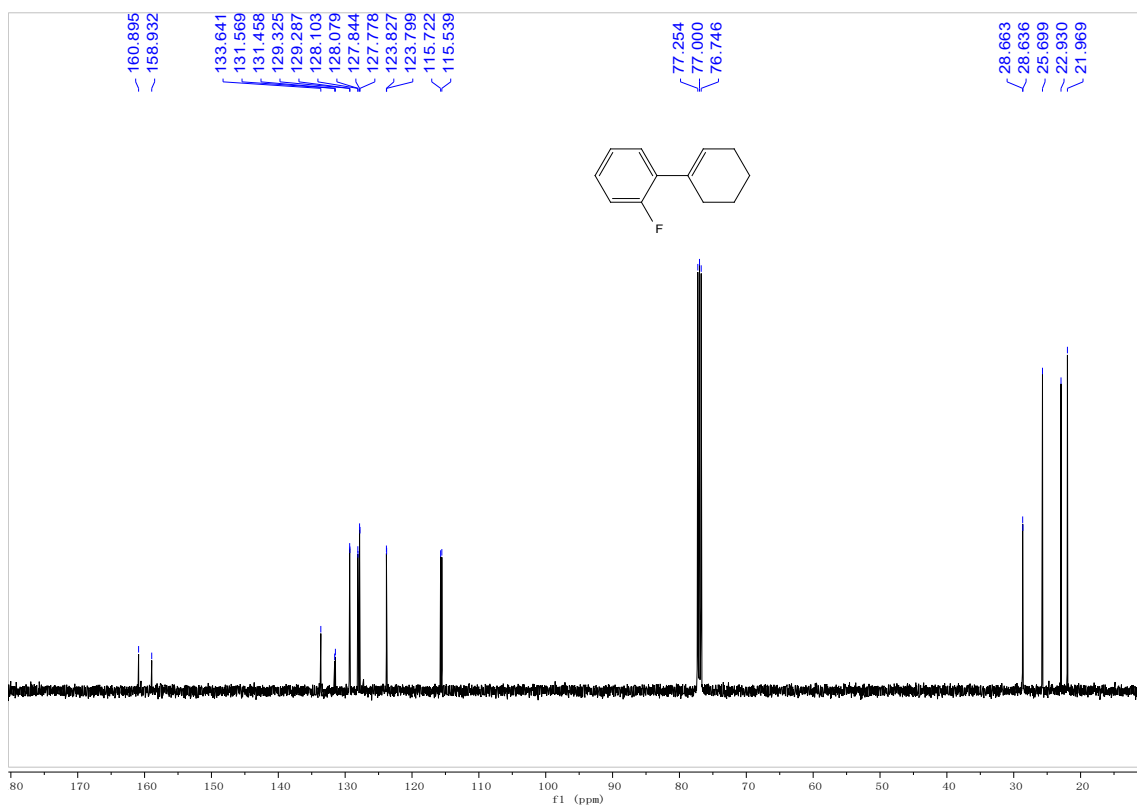

$^1\text{H}$  NMR (500 MHz,  $\text{CDCl}_3$ ) spectrum of compound **1k**

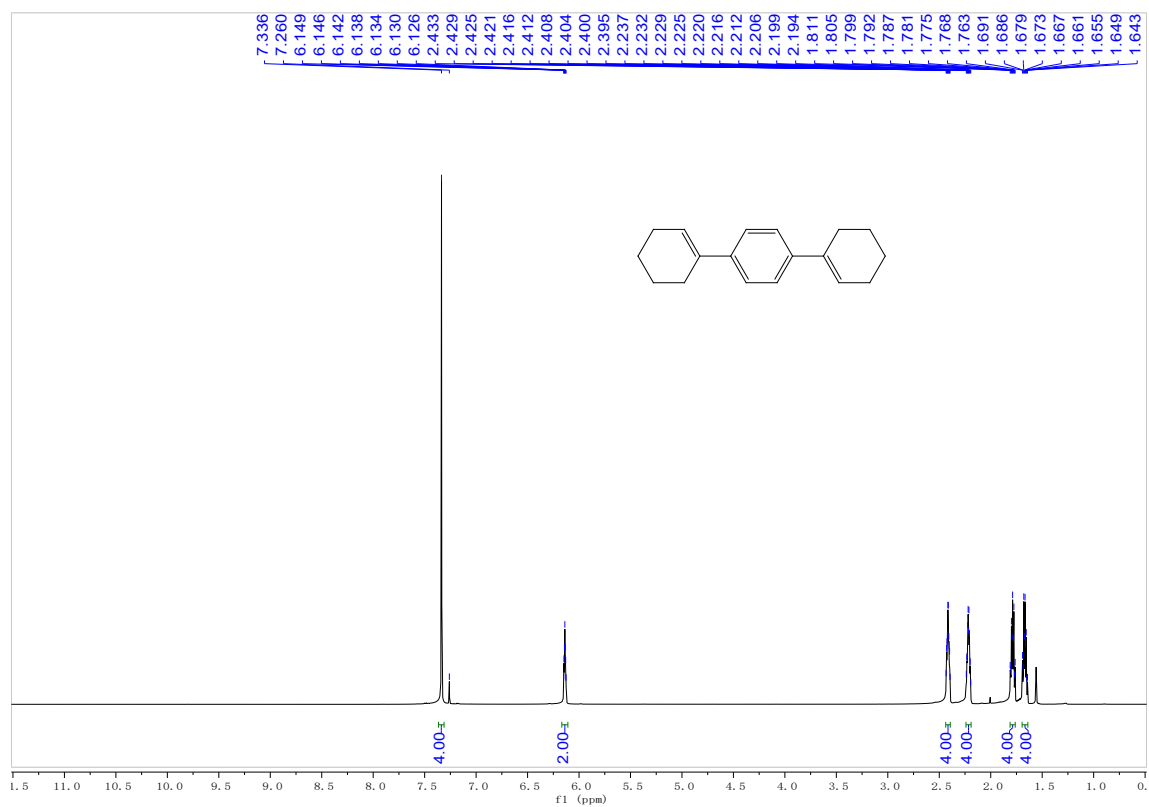

$^{13}\text{C}$  NMR (125 MHz,  $\text{CDCl}_3$ ) spectrum of compound **1k**

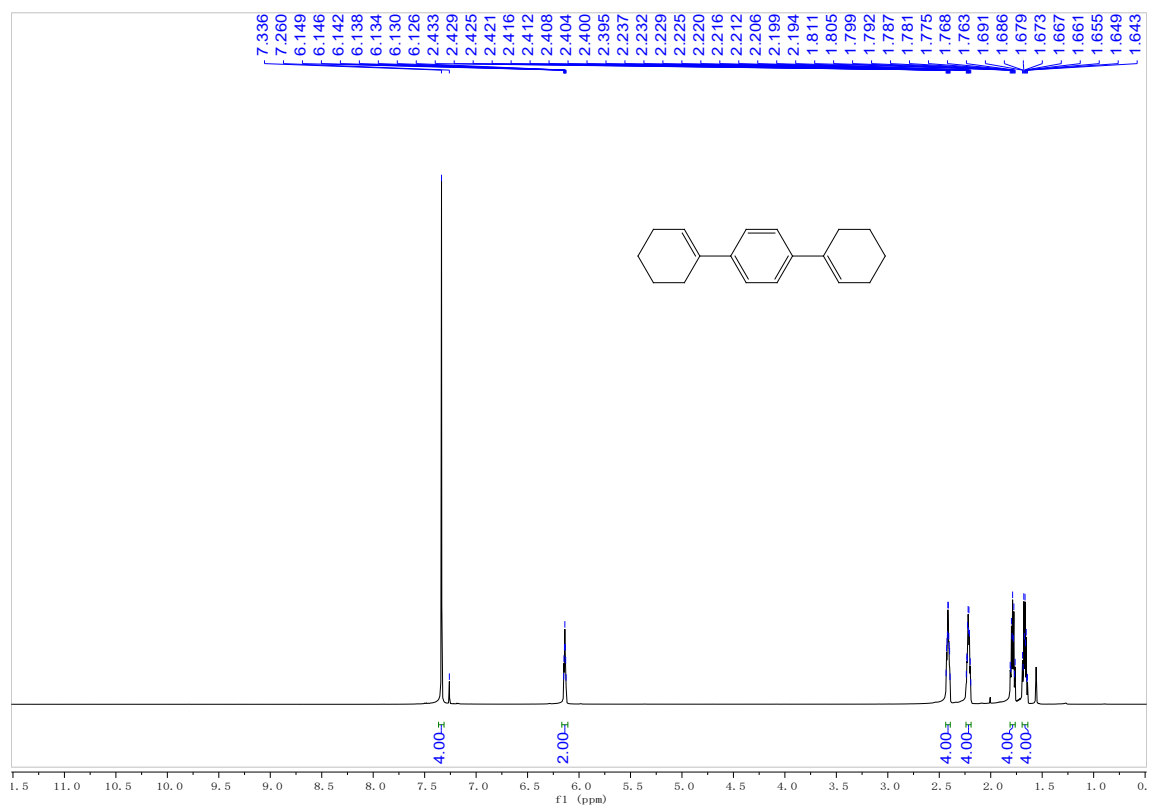

<sup>1</sup>H NMR (500 MHz, CDCl<sub>3</sub>) spectrum of compound **11**

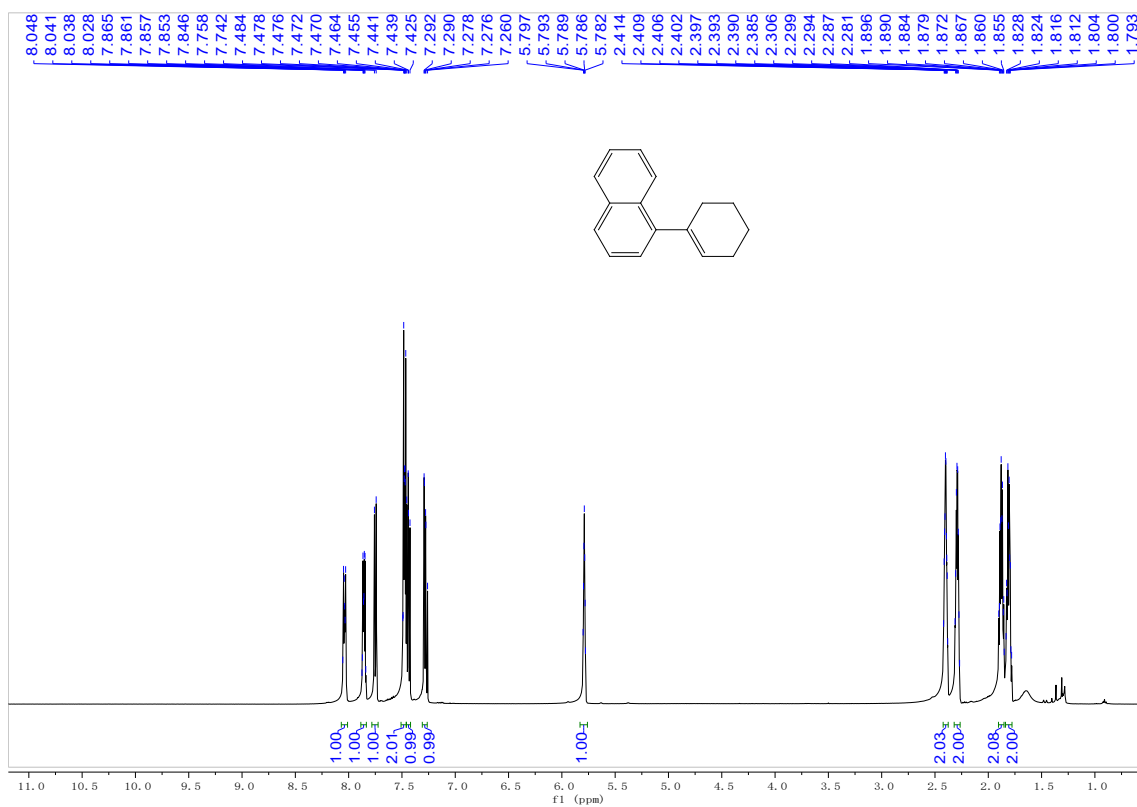

<sup>13</sup>C NMR (125 MHz, CDCl<sub>3</sub>) spectrum of compound **11**

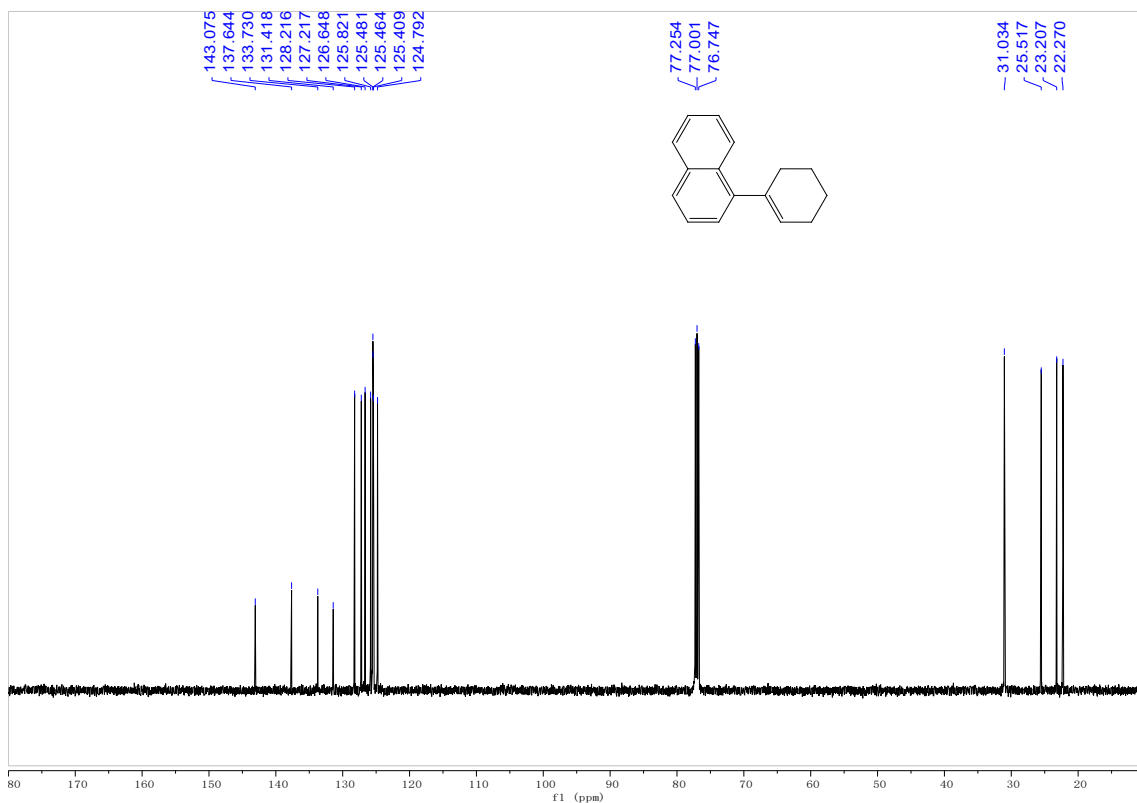

$^1\text{H}$  NMR (500 MHz,  $\text{CDCl}_3$ ) spectrum of compound **1m**

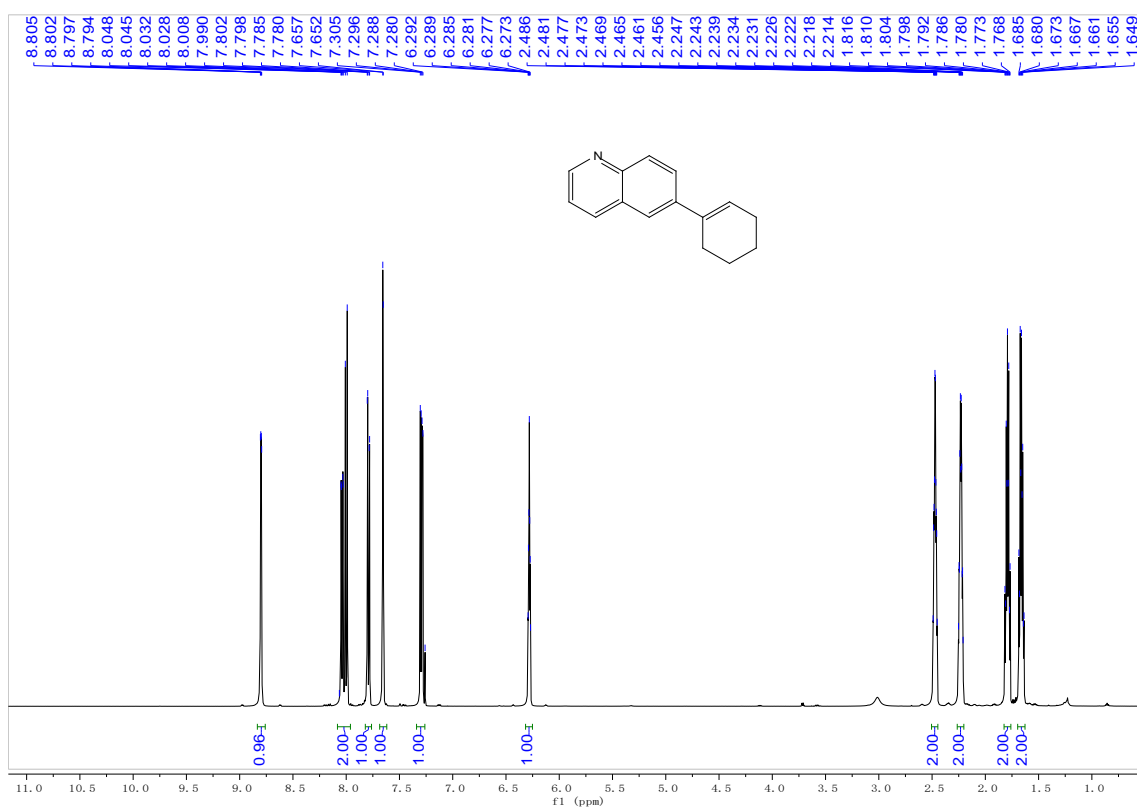

$^{13}\text{C}$  NMR (125 MHz,  $\text{CDCl}_3$ ) spectrum of compound **1m**

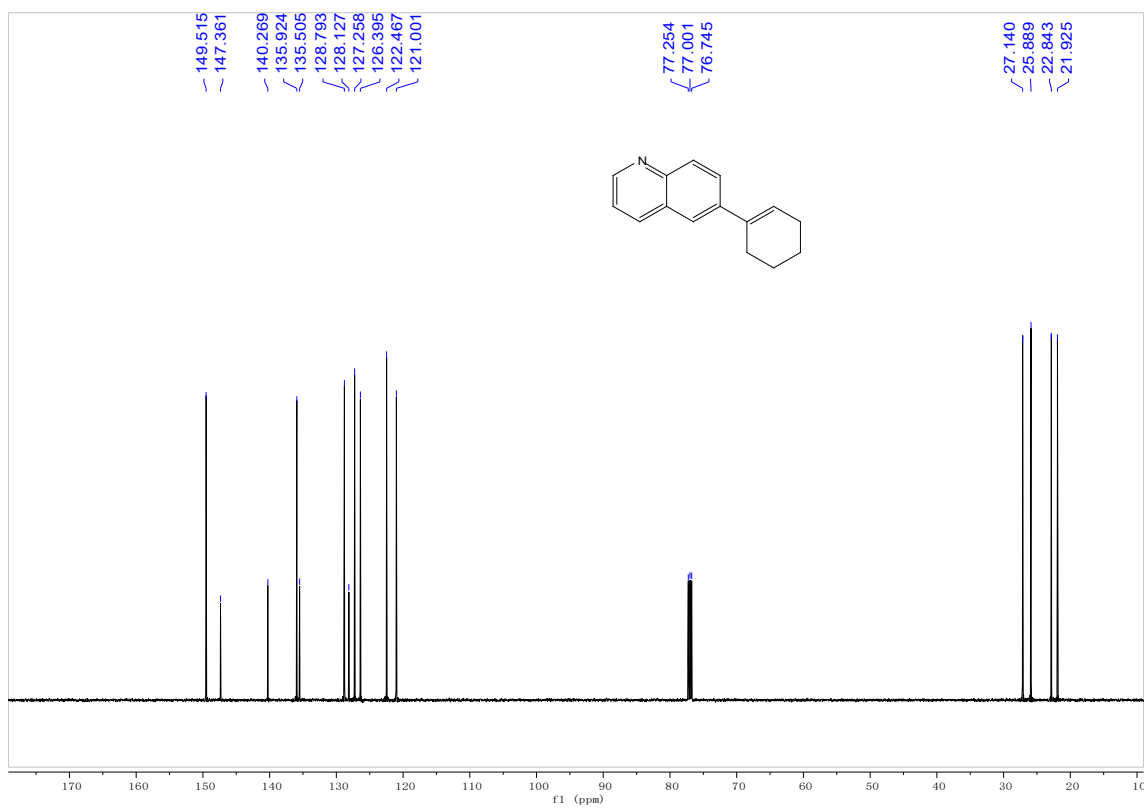



<sup>1</sup>H NMR (500 MHz, CDCl<sub>3</sub>) spectrum of compound **1n**

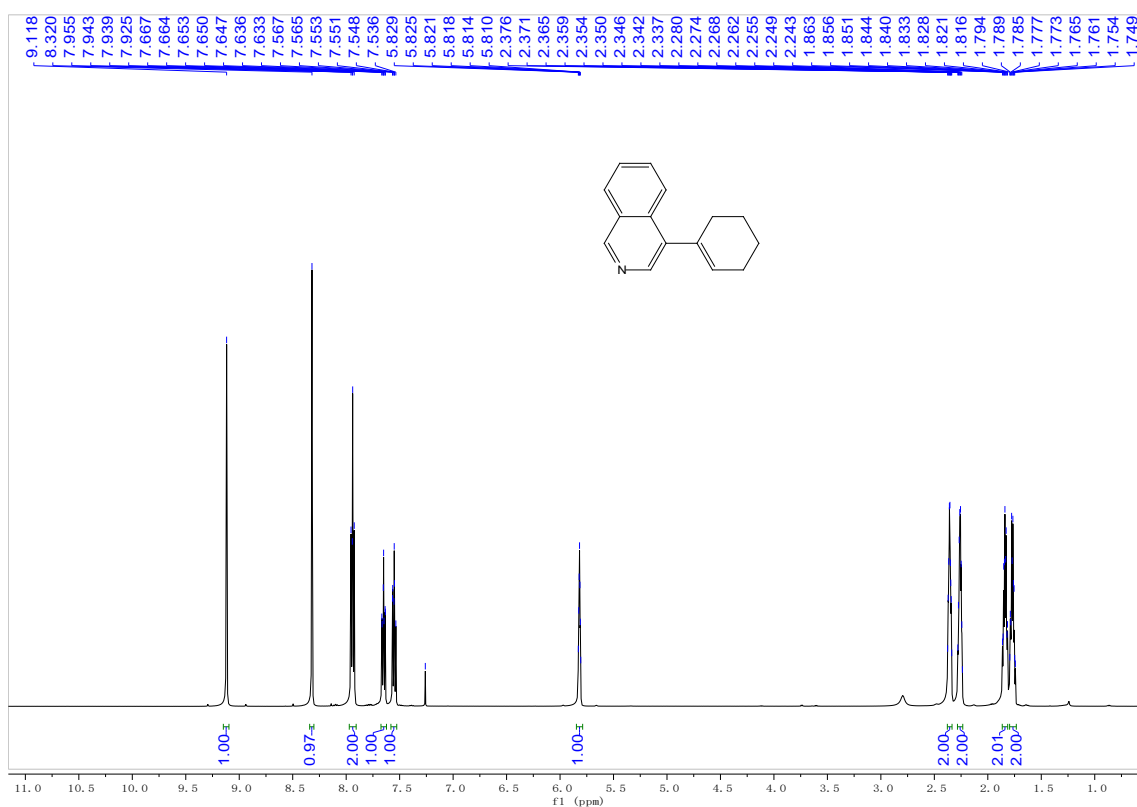

<sup>13</sup>C NMR (125 MHz, CDCl<sub>3</sub>) spectrum of compound **1n**

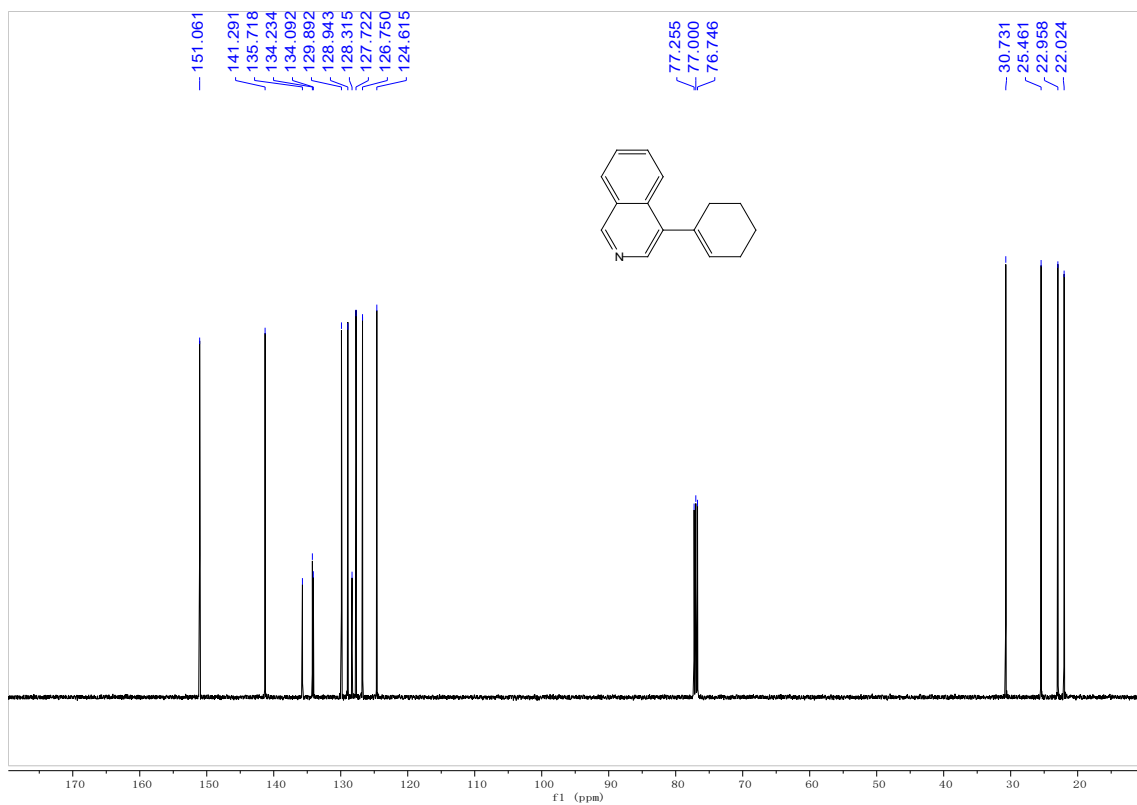

<sup>1</sup>H NMR (500 MHz, CDCl<sub>3</sub>) spectrum of compound **1o**

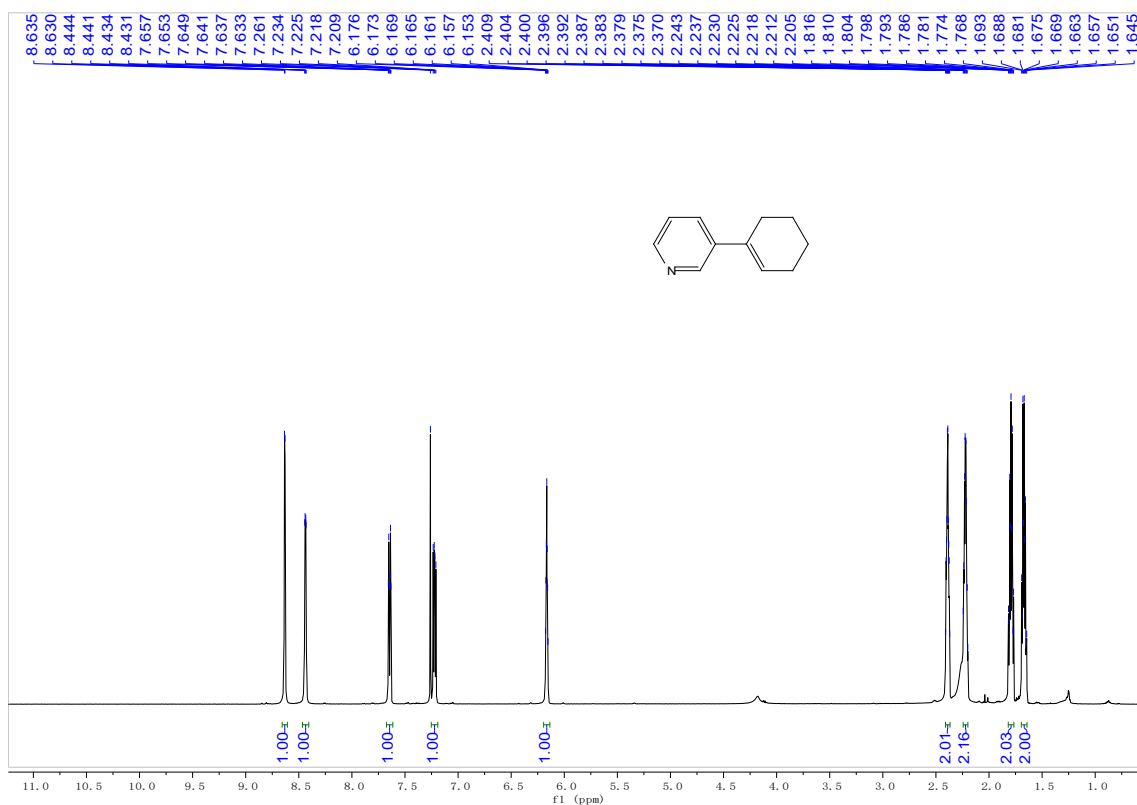

<sup>13</sup>C NMR (125 MHz, CDCl<sub>3</sub>) spectrum of compound **1o**

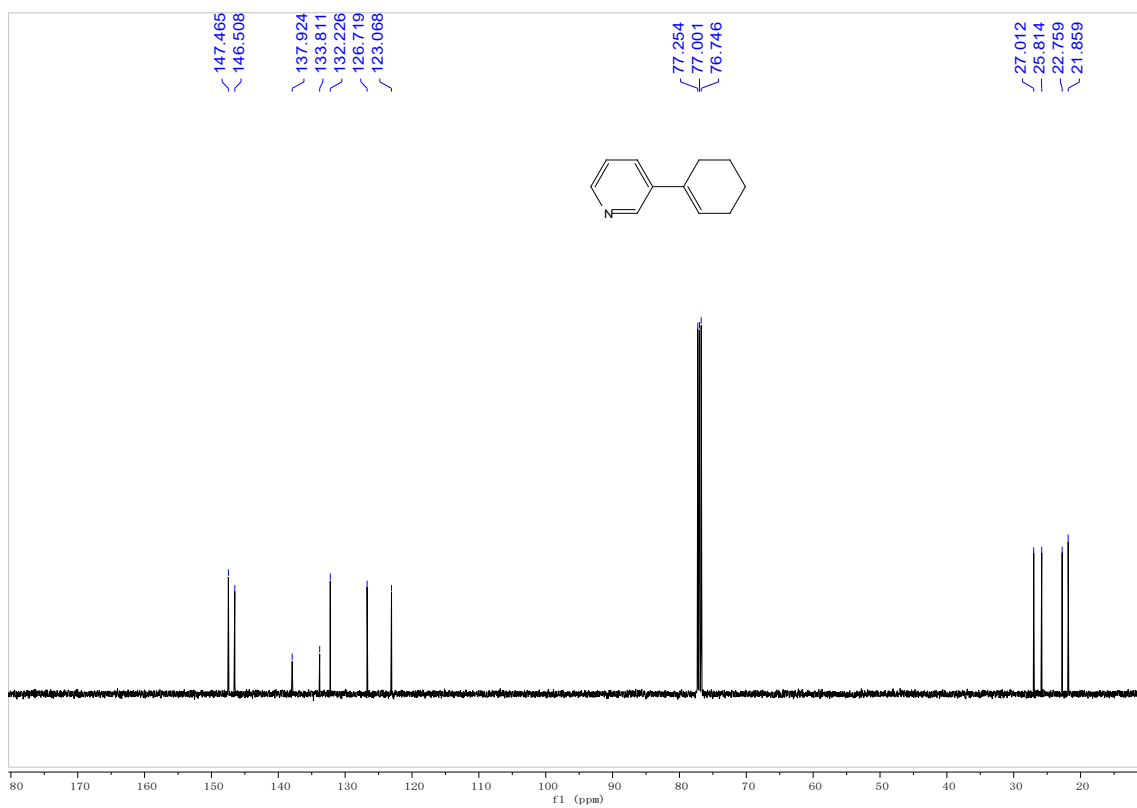

<sup>1</sup>H NMR (500 MHz, CDCl<sub>3</sub>) spectrum of compound **1p**

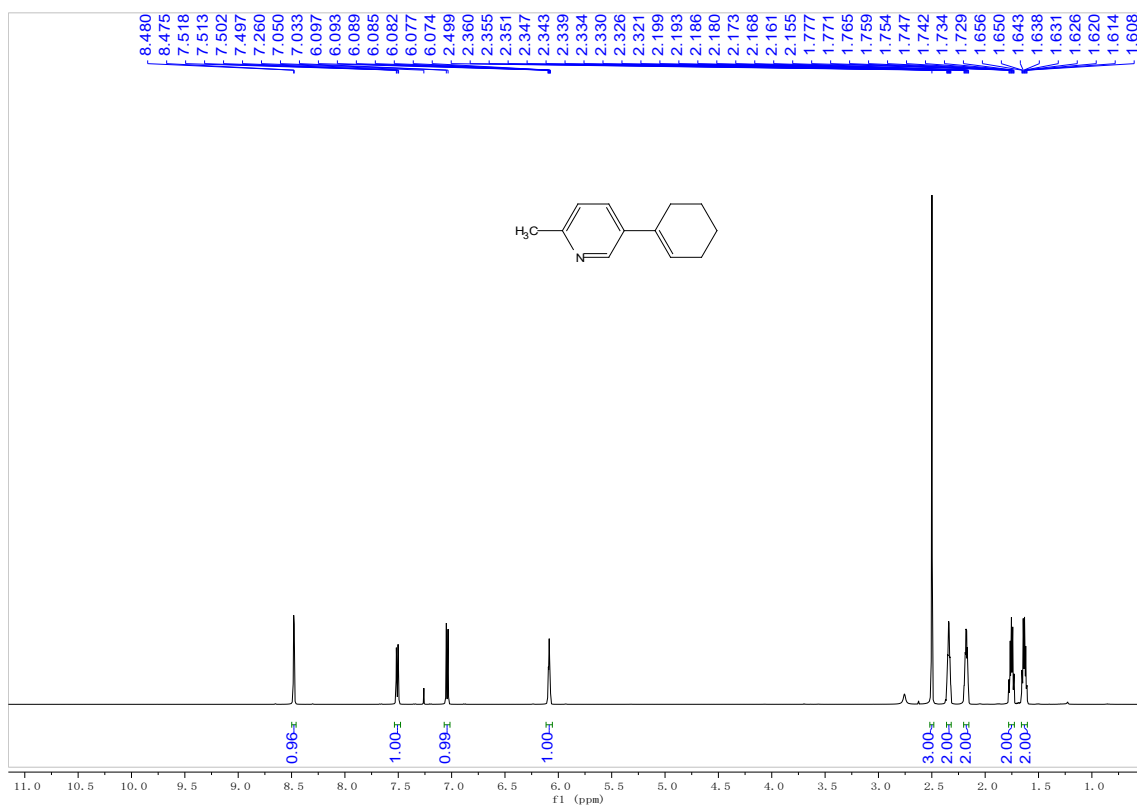

<sup>13</sup>C NMR (125 MHz, CDCl<sub>3</sub>) spectrum of compound **1p**

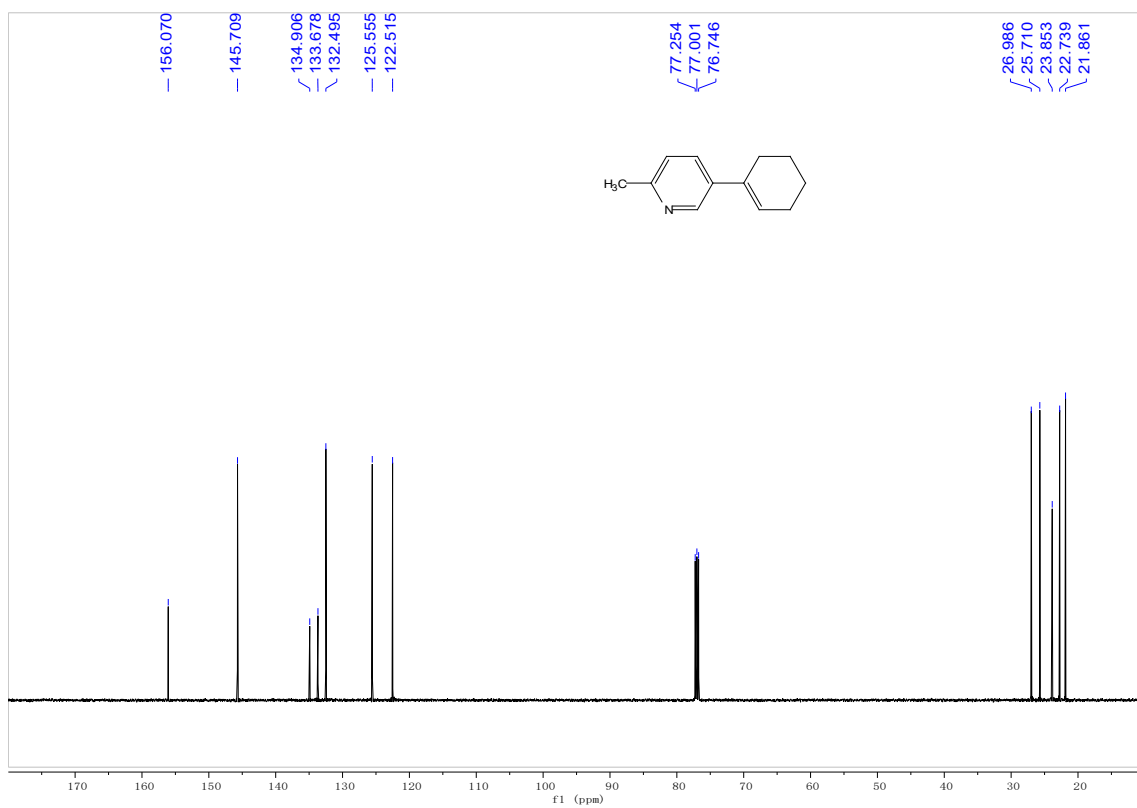

<sup>1</sup>H NMR (500 MHz, CDCl<sub>3</sub>) spectrum of compound **1q**

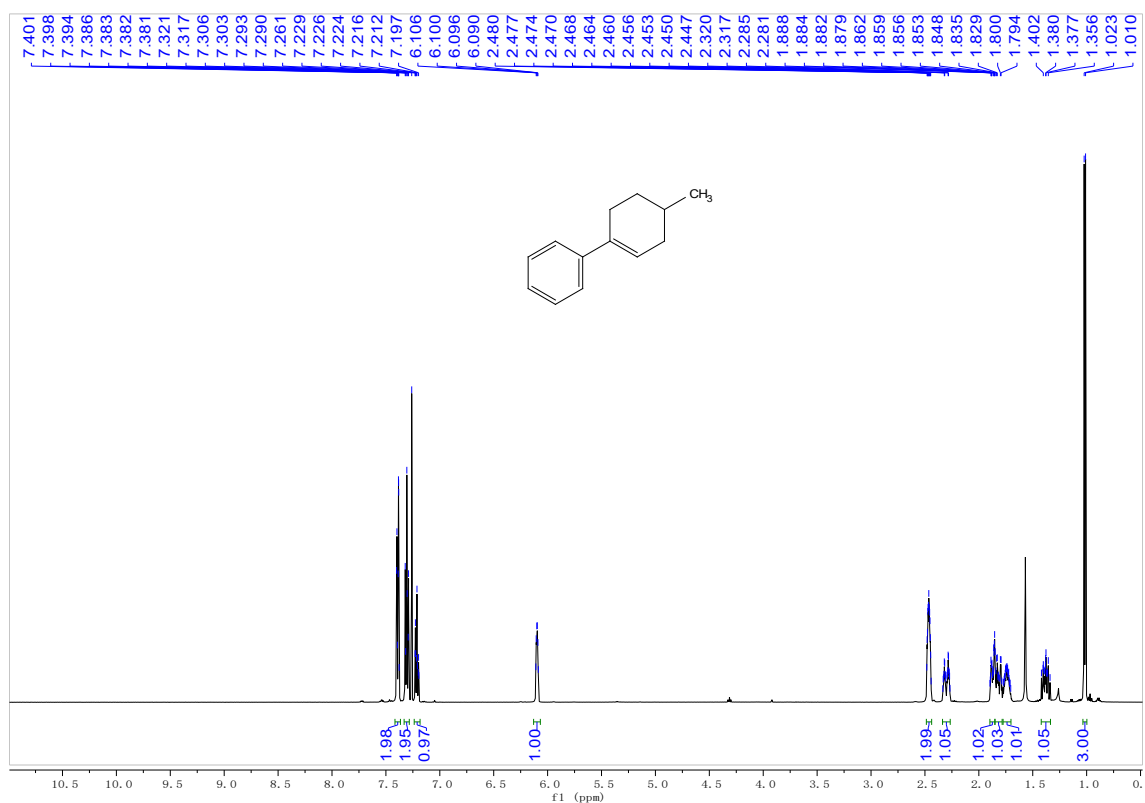

<sup>13</sup>C NMR (125 MHz, CDCl<sub>3</sub>) spectrum of compound **1q**

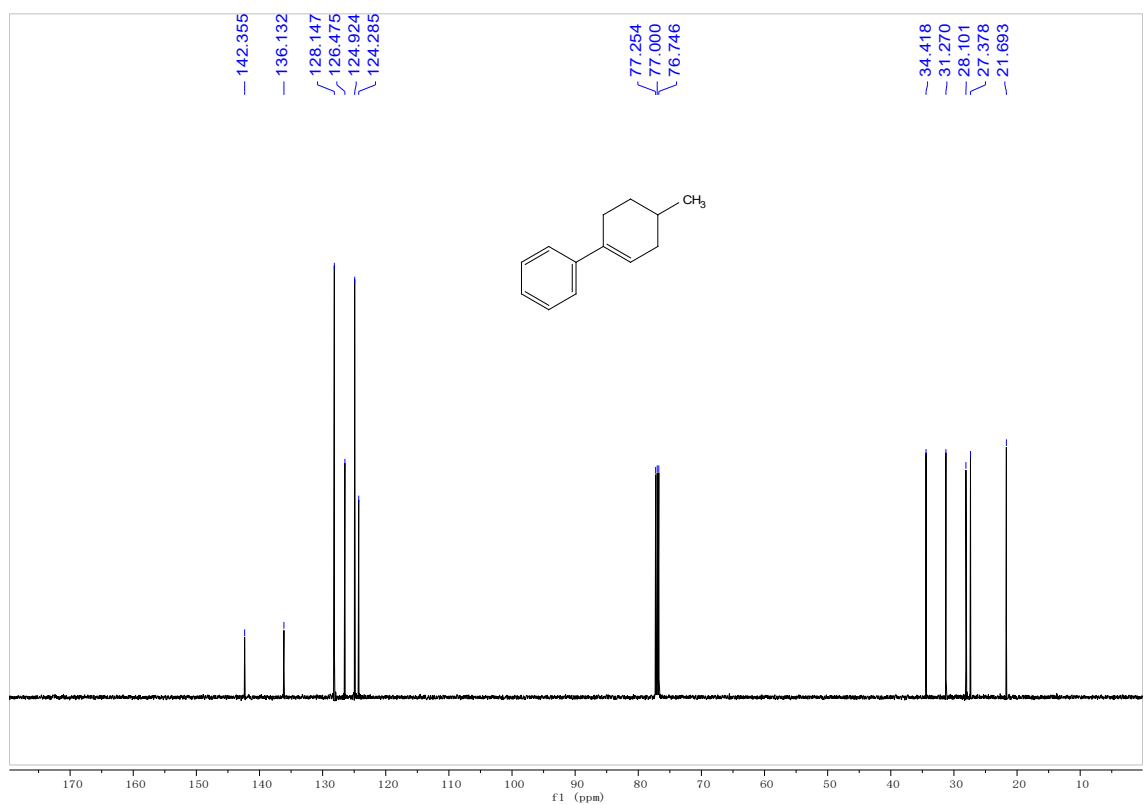

<sup>1</sup>H NMR (500 MHz, CDCl<sub>3</sub>) spectrum of compound **1r**

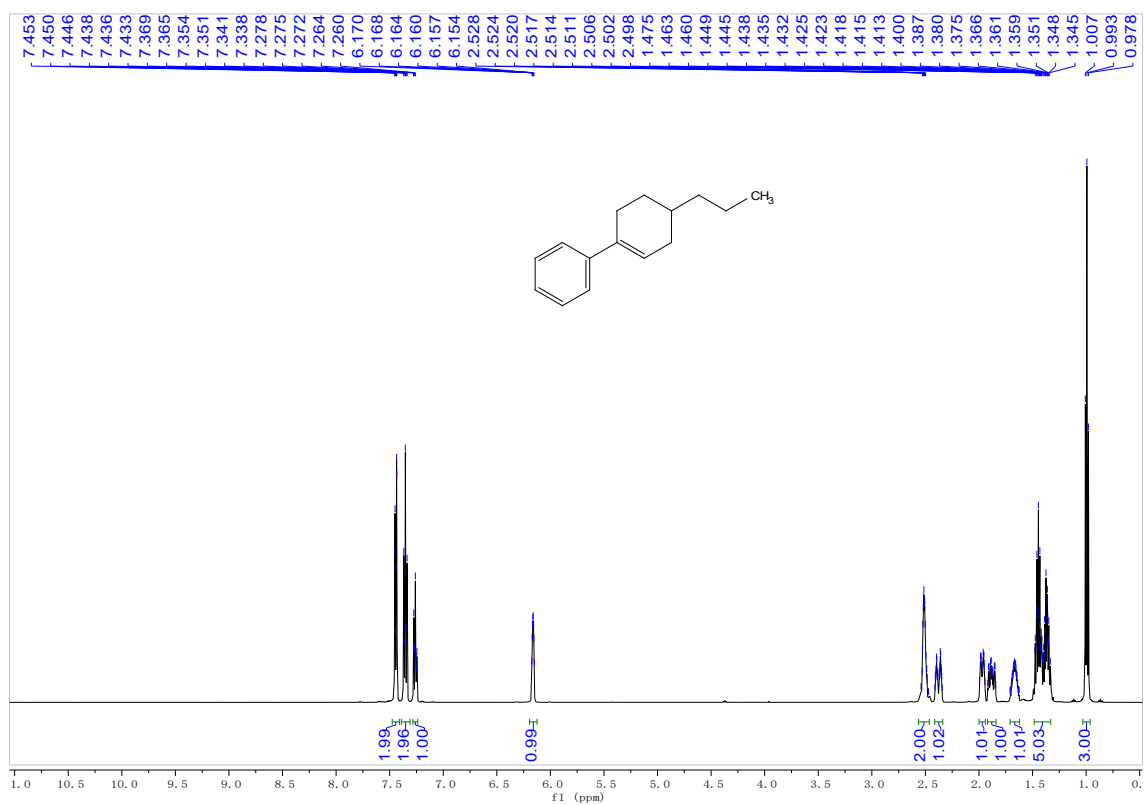

<sup>13</sup>C NMR (125 MHz, CDCl<sub>3</sub>) spectrum of compound **1r**

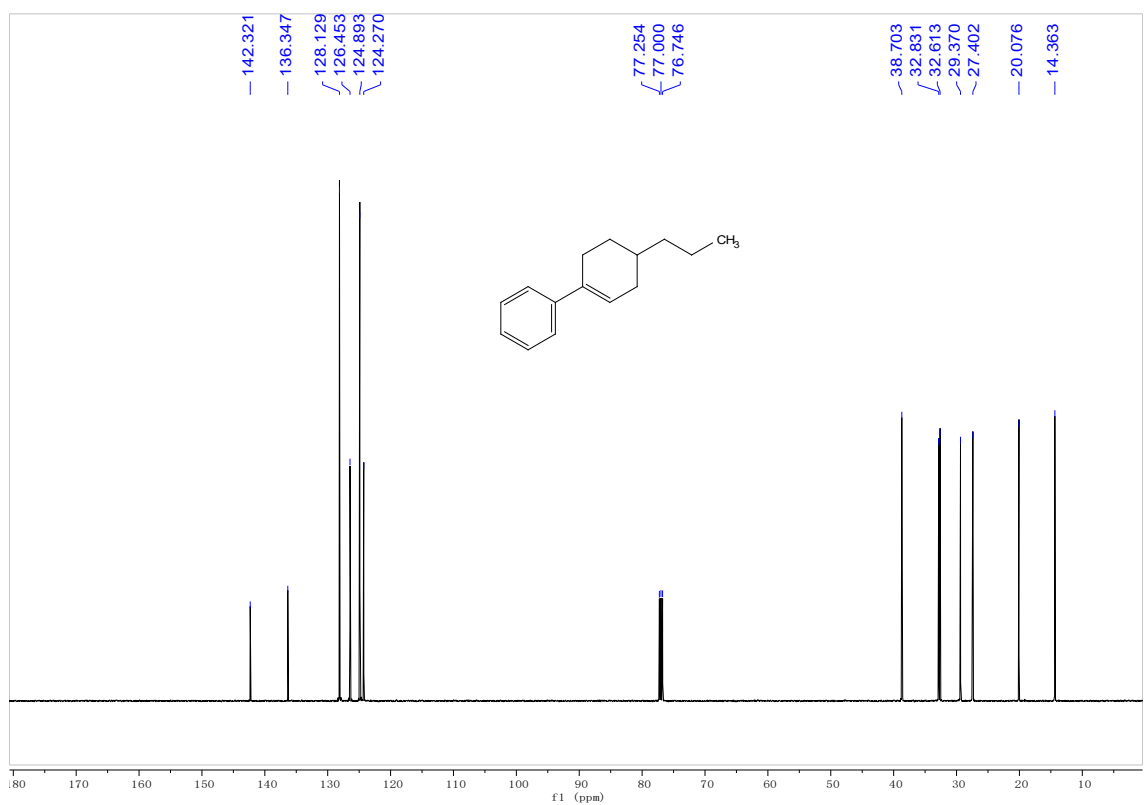

<sup>1</sup>H NMR (500 MHz, CDCl<sub>3</sub>) spectrum of compound **1s**

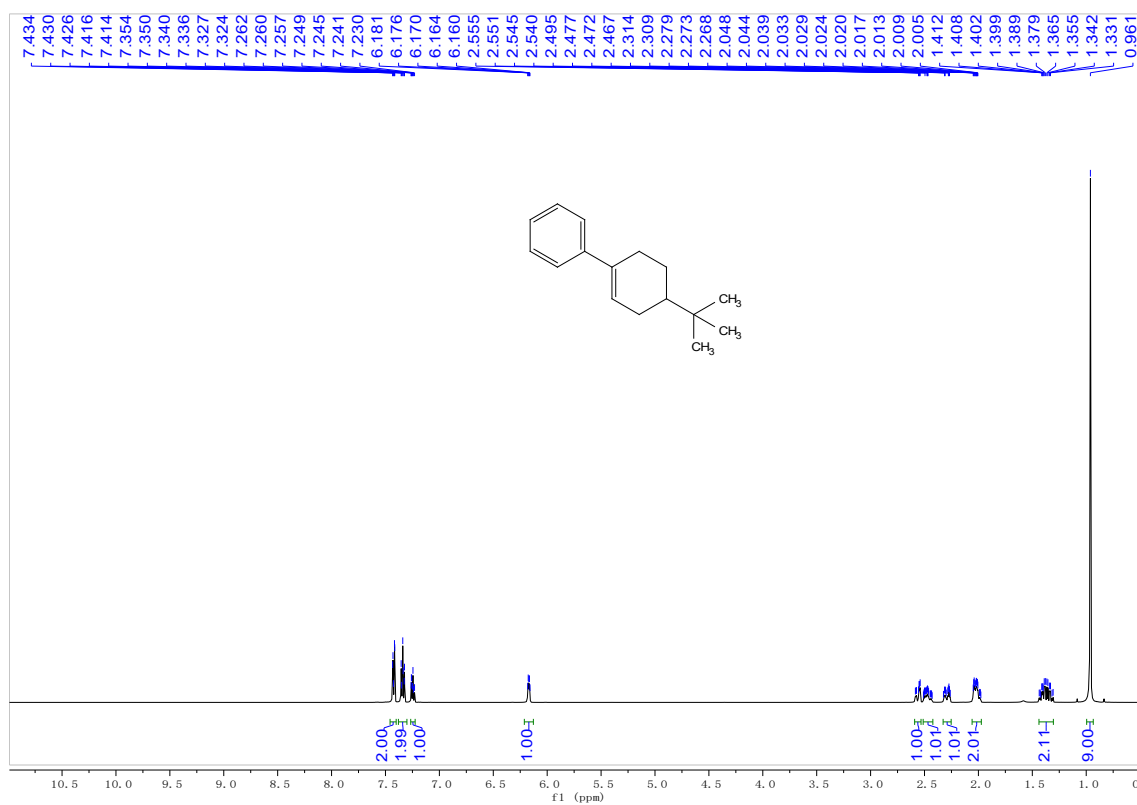

<sup>13</sup>C NMR (125 MHz, CDCl<sub>3</sub>) spectrum of compound **1s**

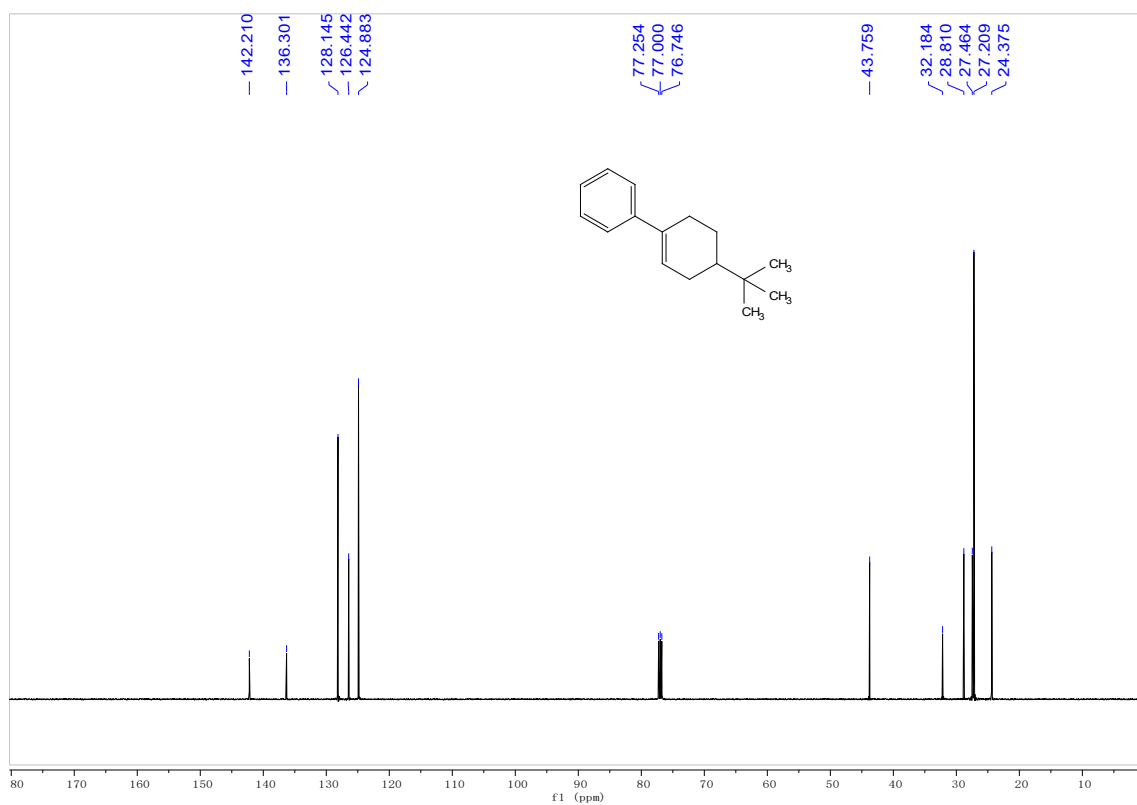

<sup>1</sup>H NMR (500 MHz, CDCl<sub>3</sub>) spectrum of compound **1t**

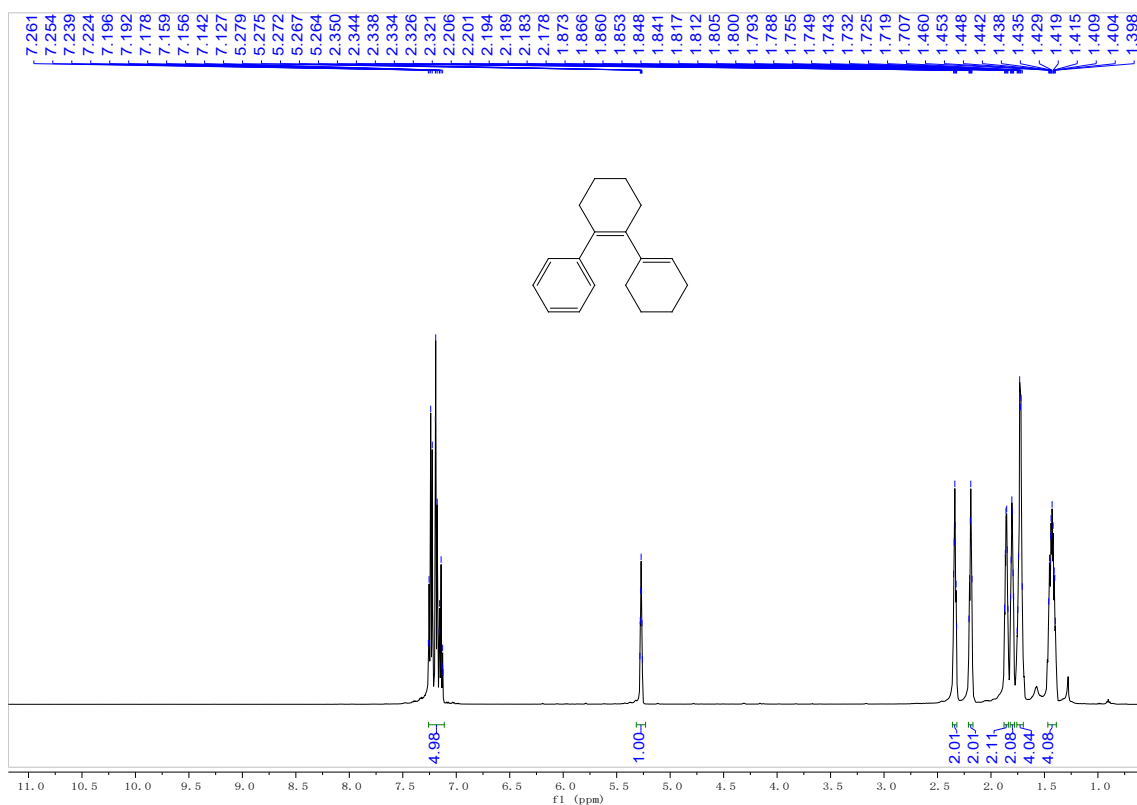

<sup>13</sup>C NMR (125 MHz, CDCl<sub>3</sub>) spectrum of compound **1t**

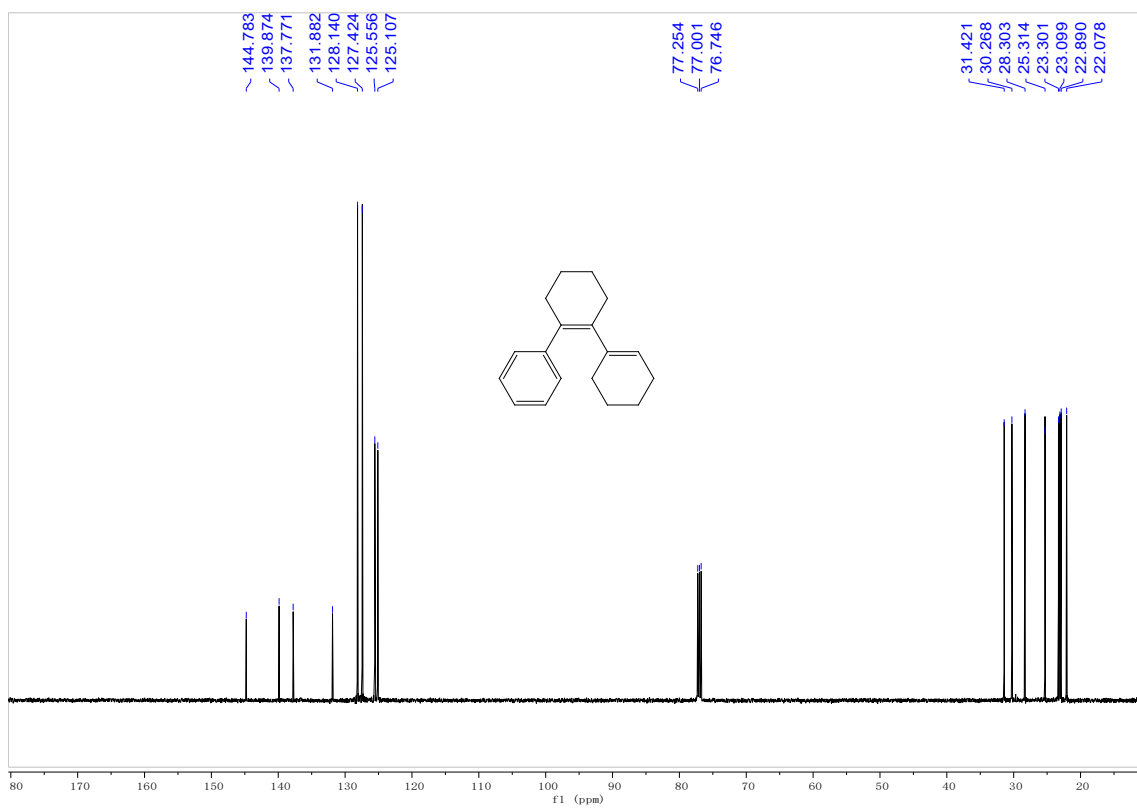

$^1\text{H}$  NMR (500 MHz,  $\text{CDCl}_3$ ) spectrum of compound **1u**

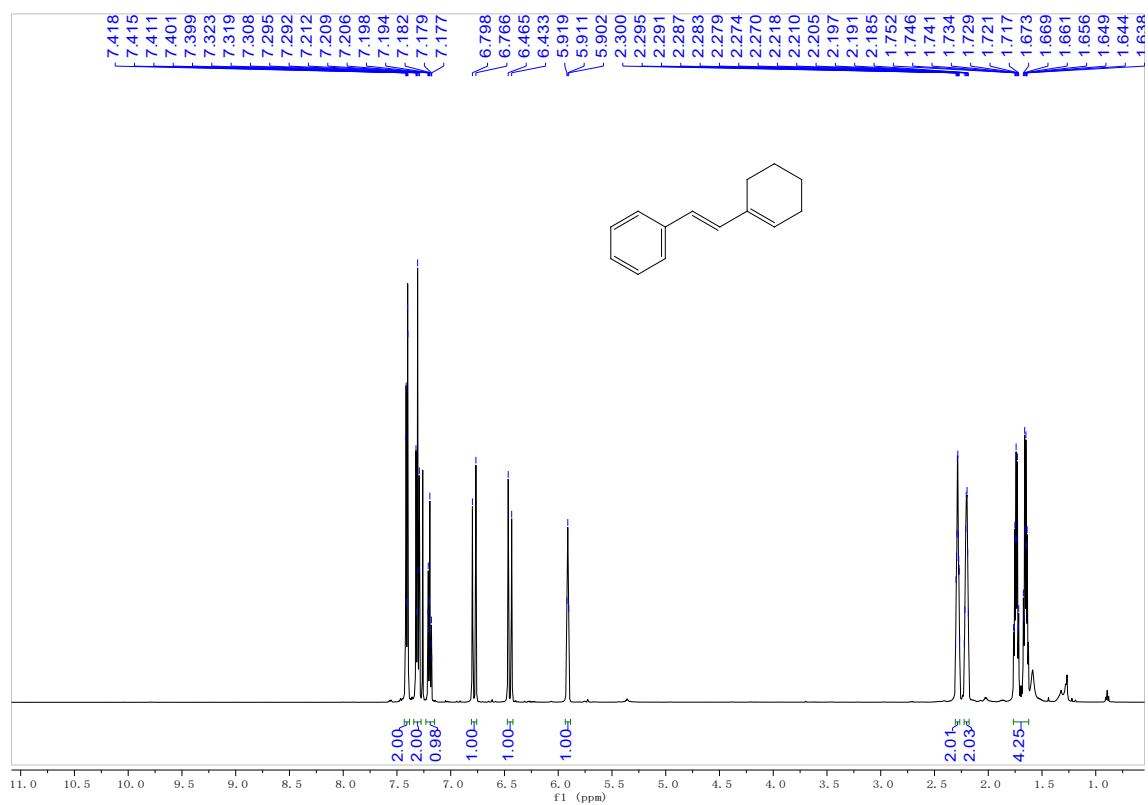

$^{13}\text{C}$  NMR (125 MHz,  $\text{CDCl}_3$ ) spectrum of compound **1u**

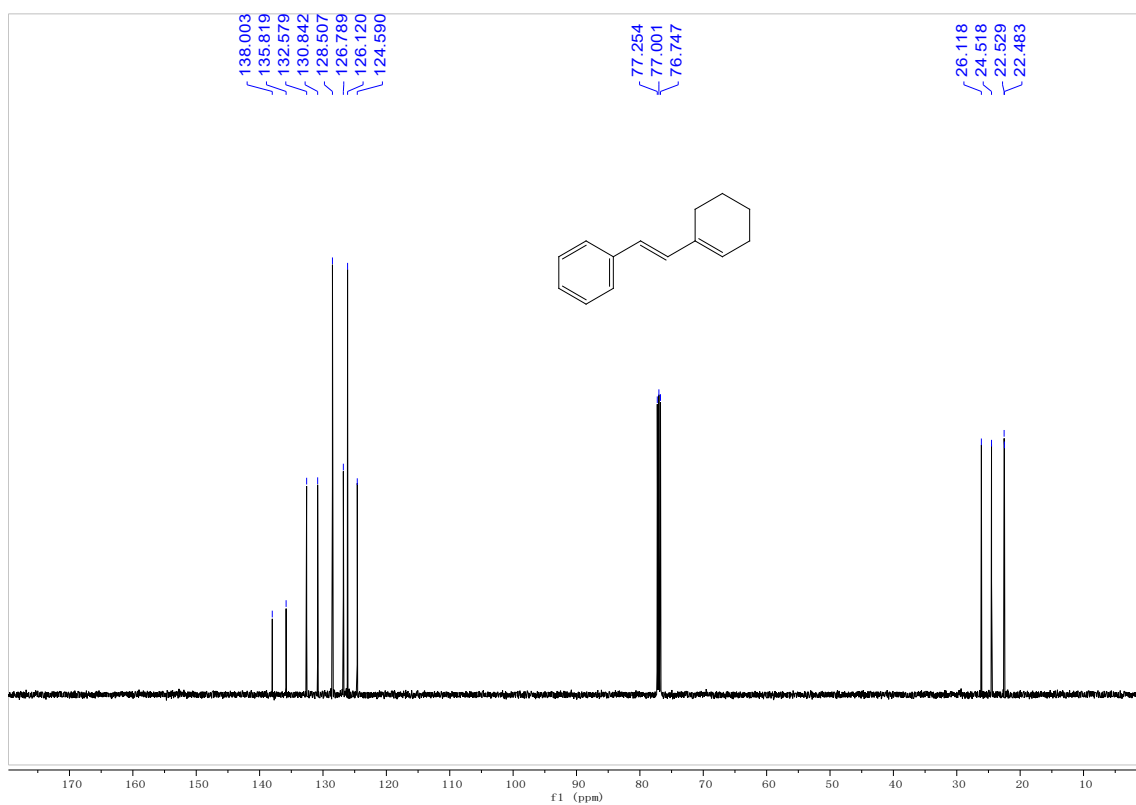



$^1\text{H}$  NMR (500 MHz,  $\text{CDCl}_3$ ) spectrum of compound **2a**

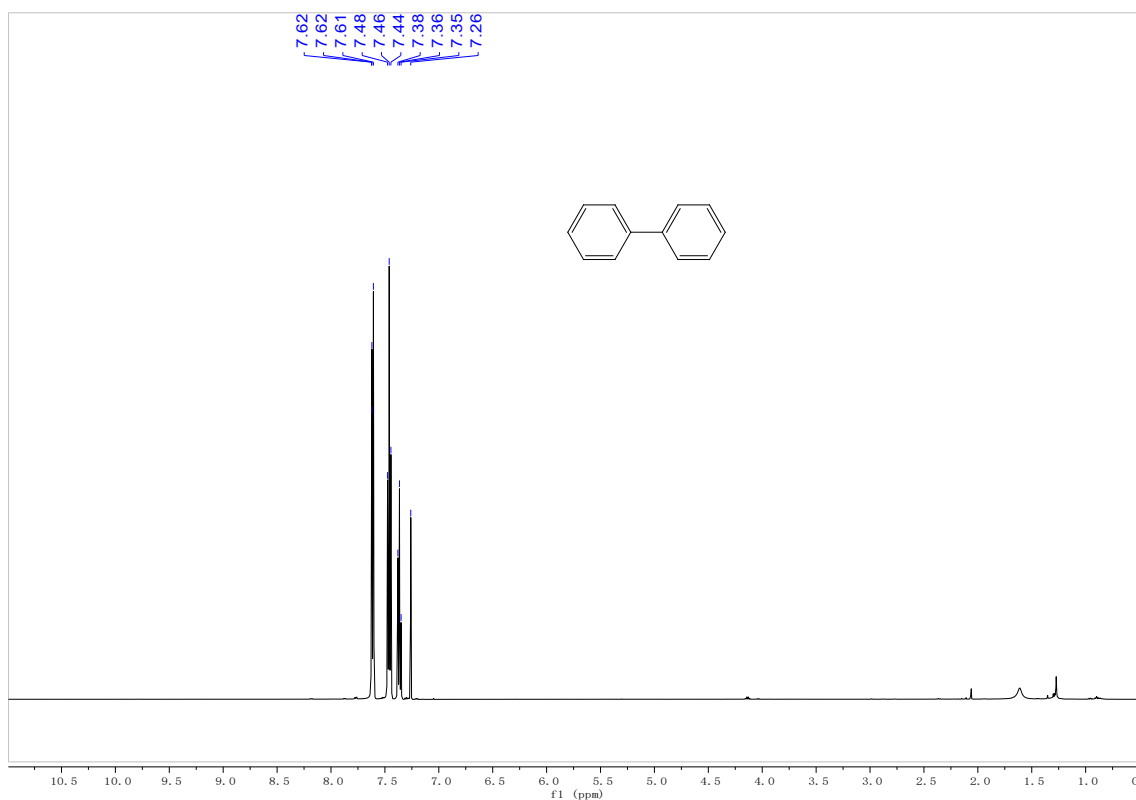

$^{13}\text{C}$  NMR (125 MHz,  $\text{CDCl}_3$ ) spectrum of compound **2a**

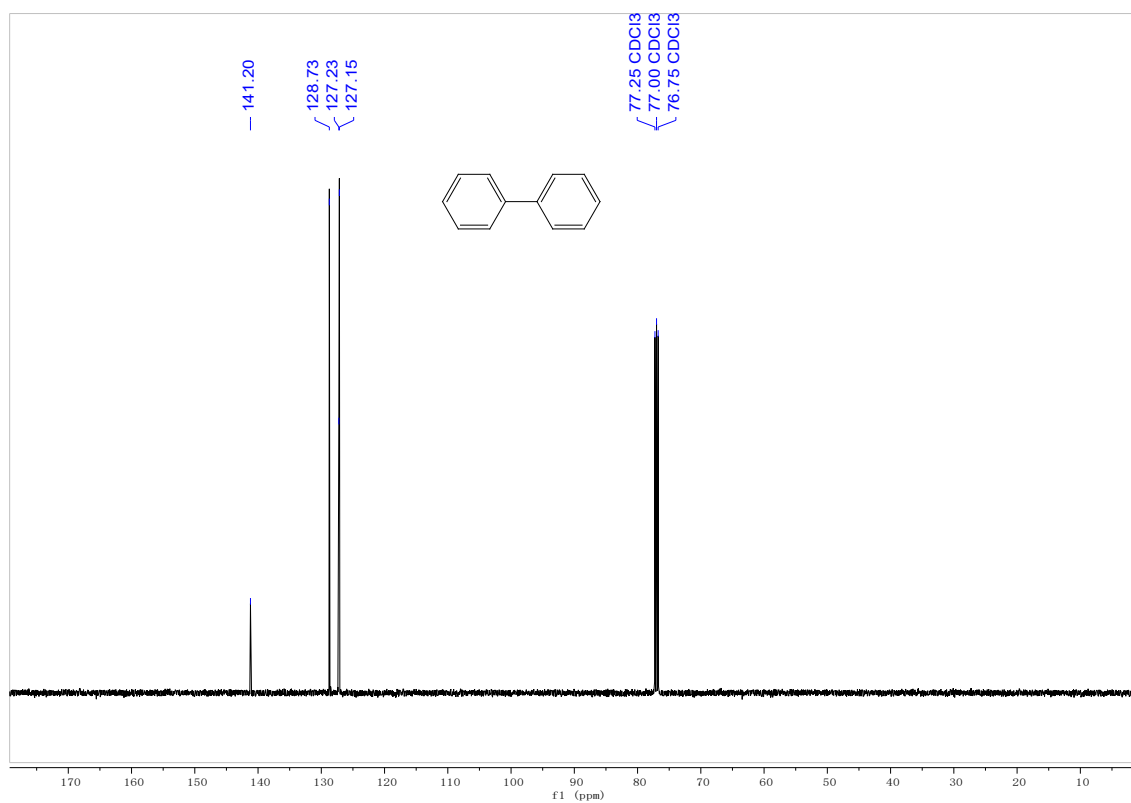

$^1\text{H}$  NMR (500 MHz,  $\text{CDCl}_3$ ) spectrum of compound **2a**

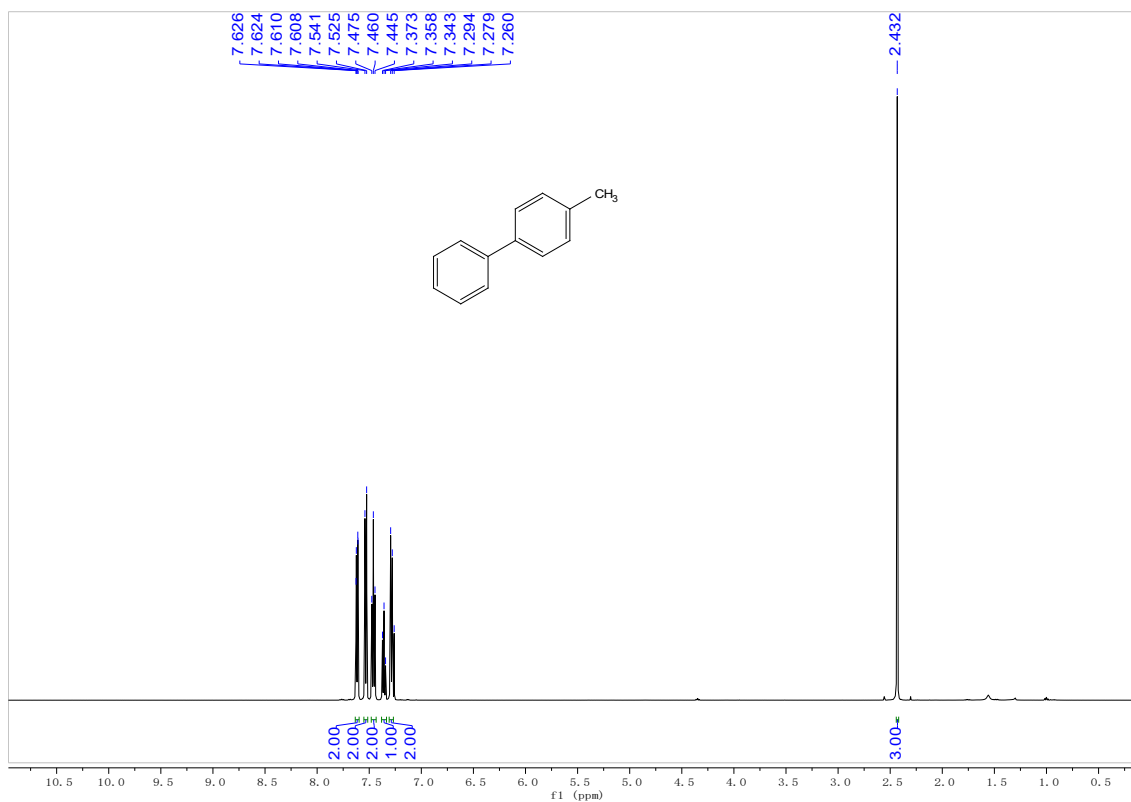

$^{13}\text{C}$  NMR (125 MHz,  $\text{CDCl}_3$ ) spectrum of compound **2a**

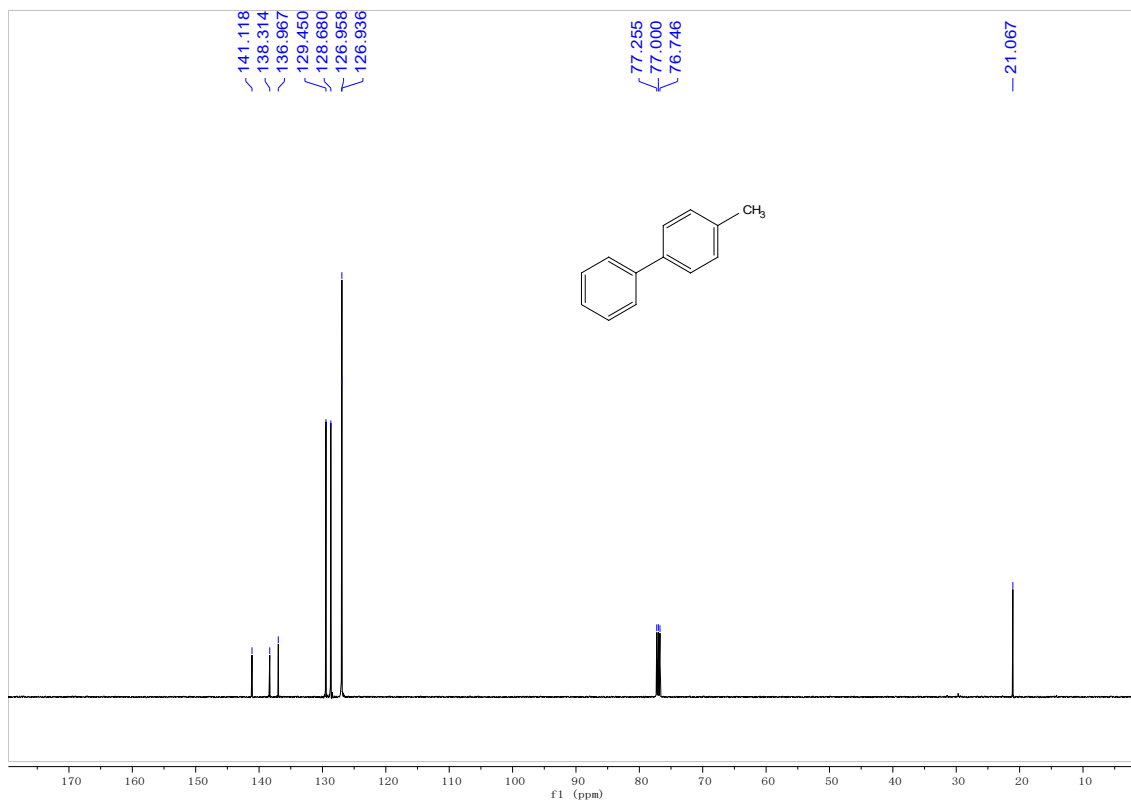

$^1\text{H}$  NMR (500 MHz,  $\text{CDCl}_3$ ) spectrum of compound **2b**

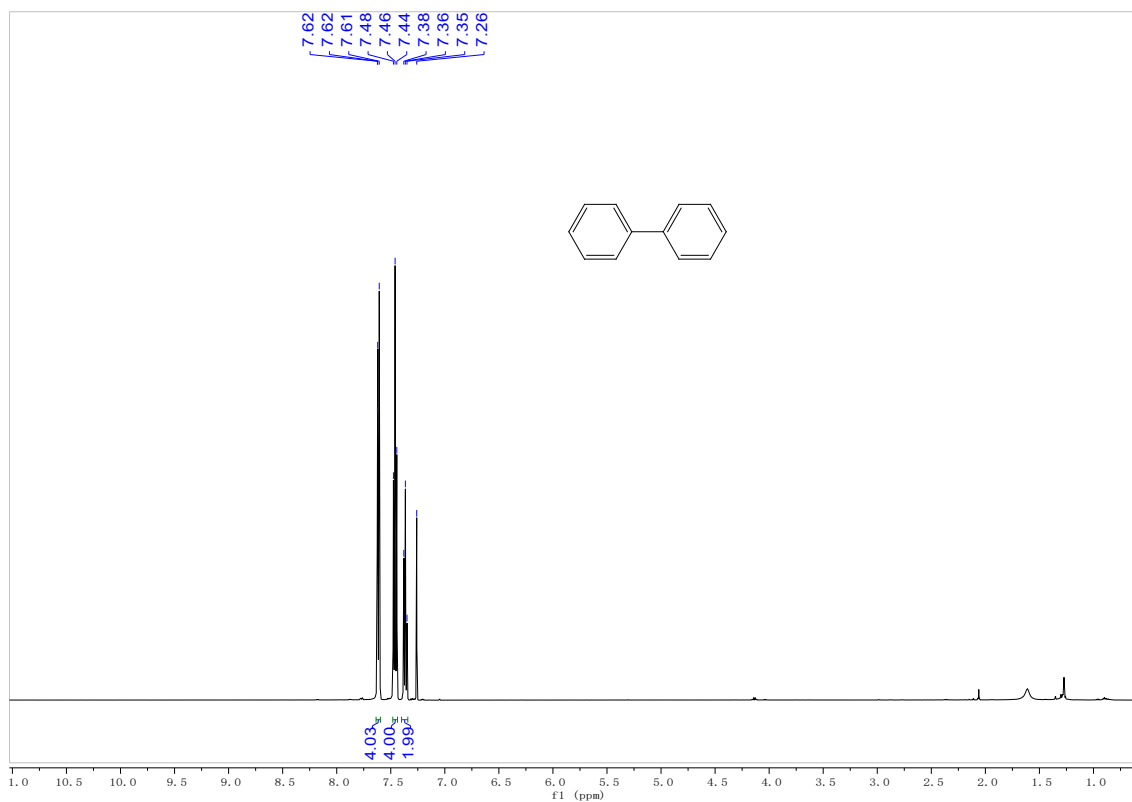

$^{13}\text{C}$  NMR (125 MHz,  $\text{CDCl}_3$ ) spectrum of compound **2b**

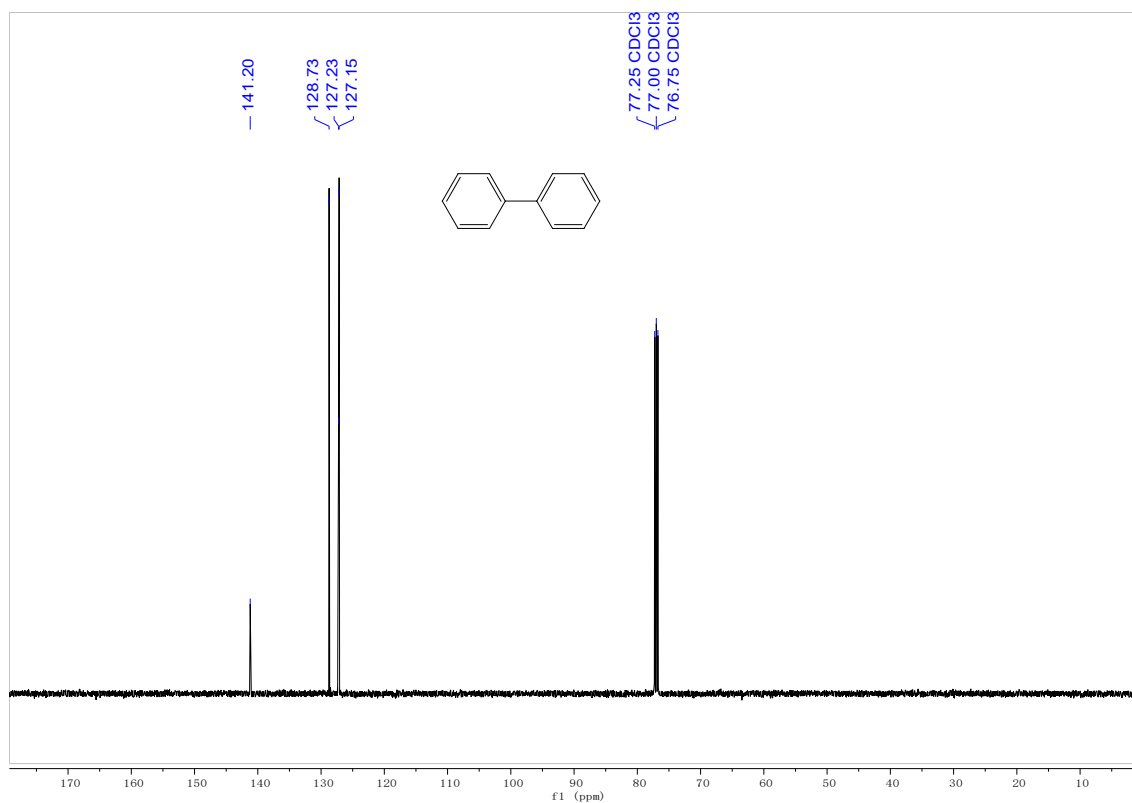

$^1\text{H}$  NMR (500 MHz,  $\text{CDCl}_3$ ) spectrum of compound **2c**

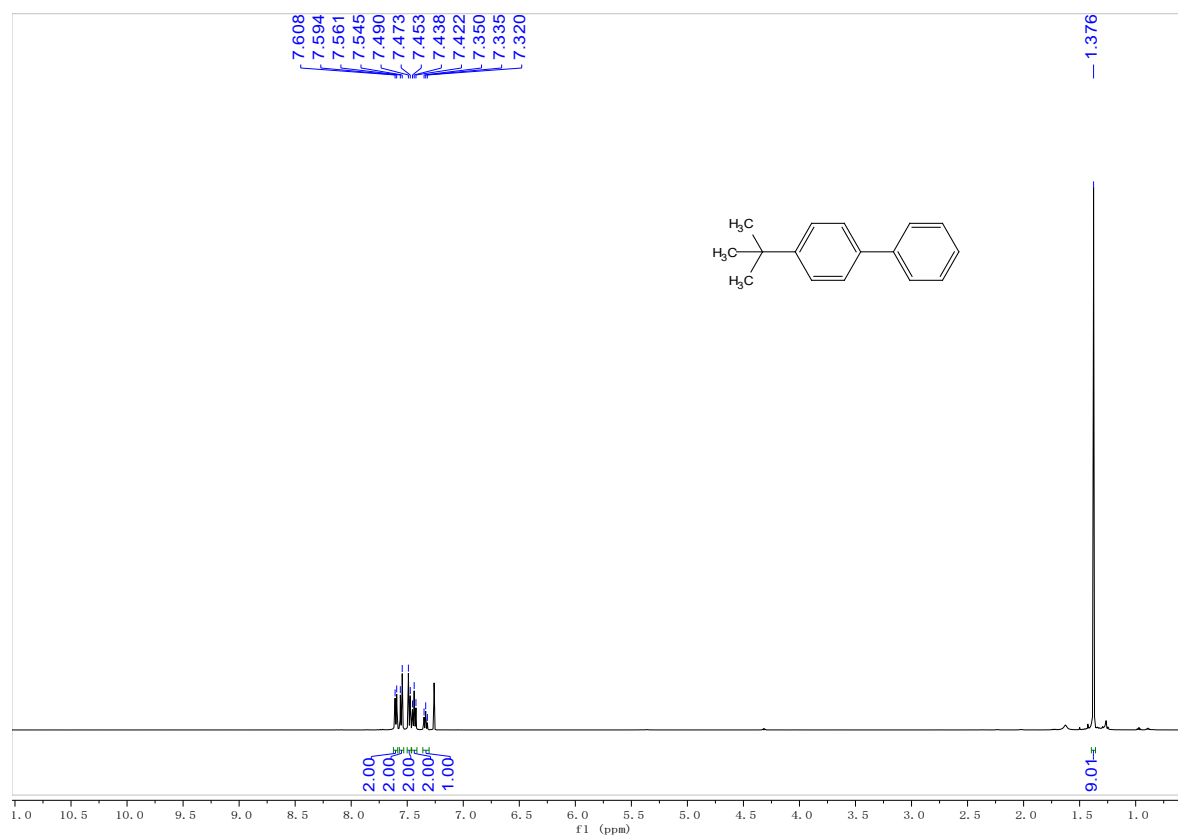

$^{13}\text{C}$  NMR (125 MHz,  $\text{CDCl}_3$ ) spectrum of compound **2c**

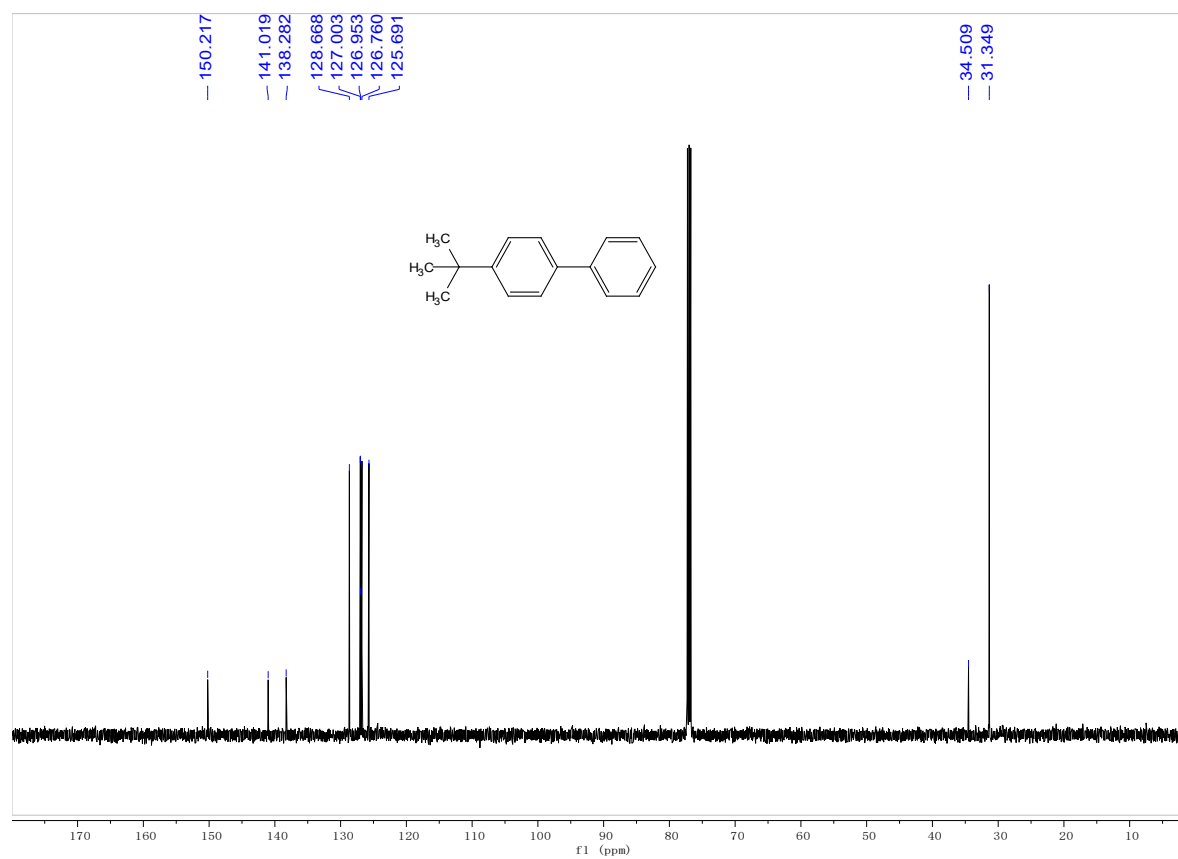

<sup>1</sup>H NMR (500 MHz, CDCl<sub>3</sub>) spectrum of compound **2d**

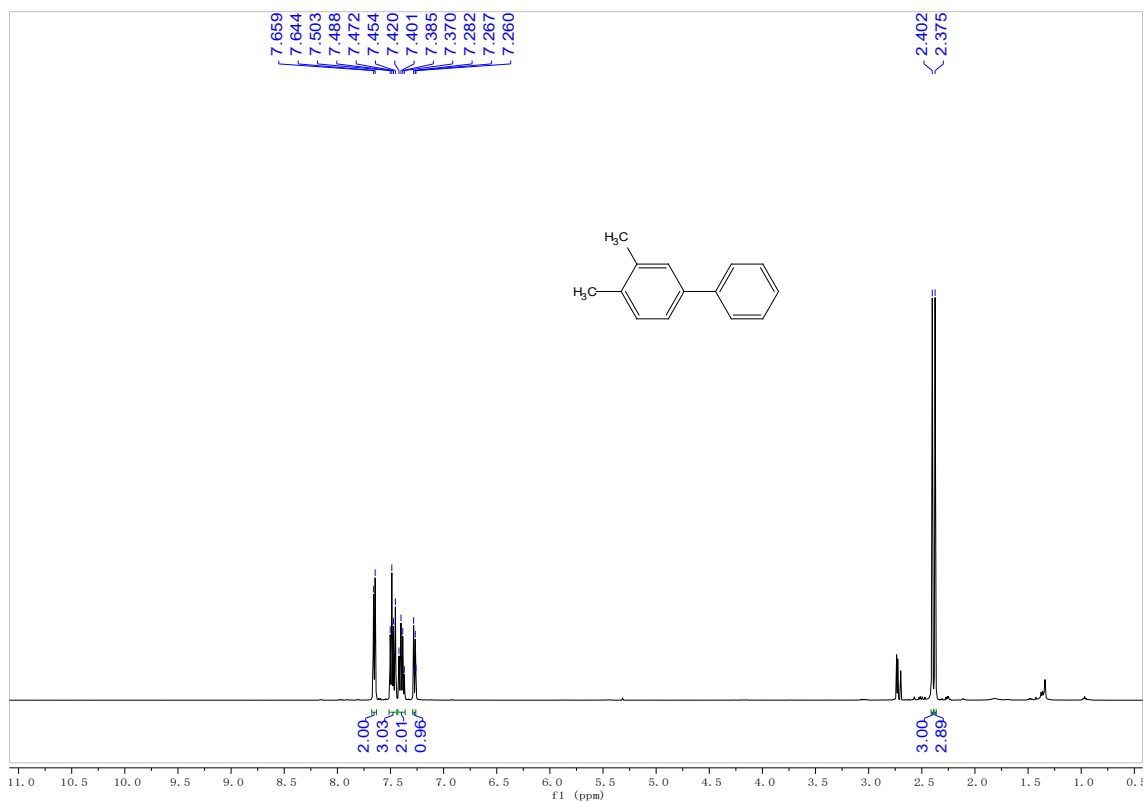

<sup>13</sup>C NMR (125 MHz, CDCl<sub>3</sub>) spectrum of compound **2d**

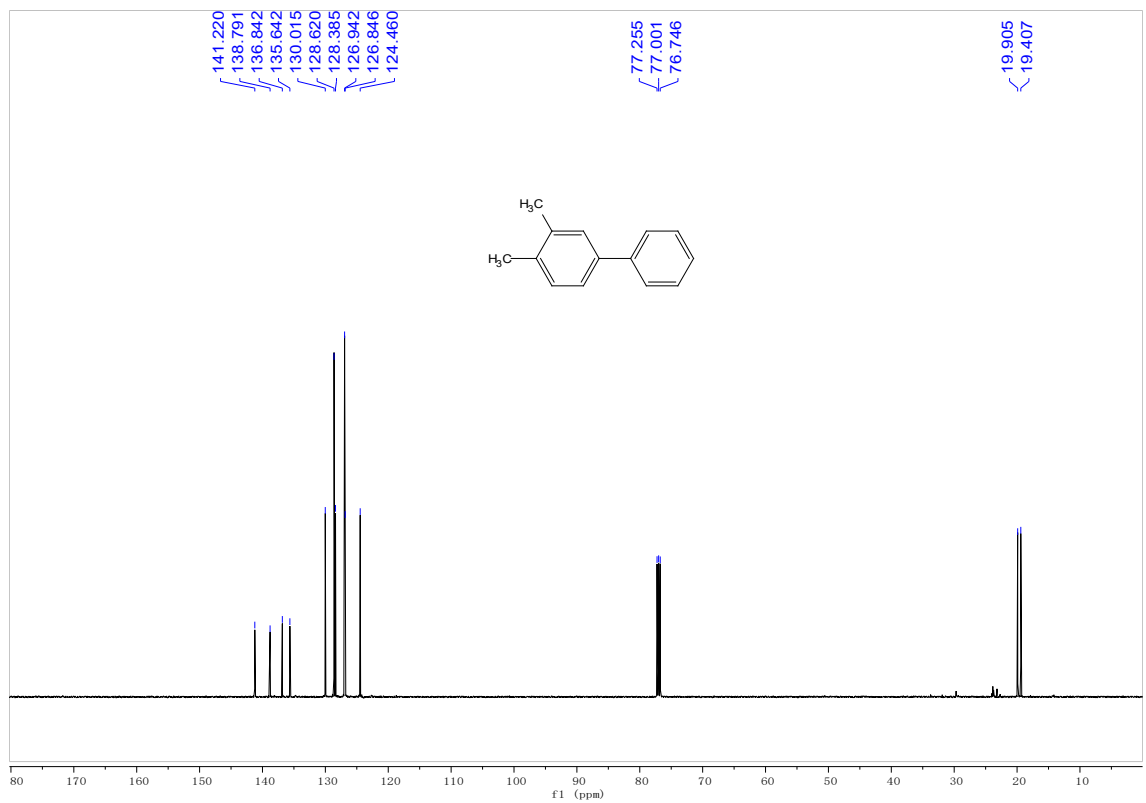

$^1\text{H}$  NMR (500 MHz,  $\text{CDCl}_3$ ) spectrum of compound **2e**

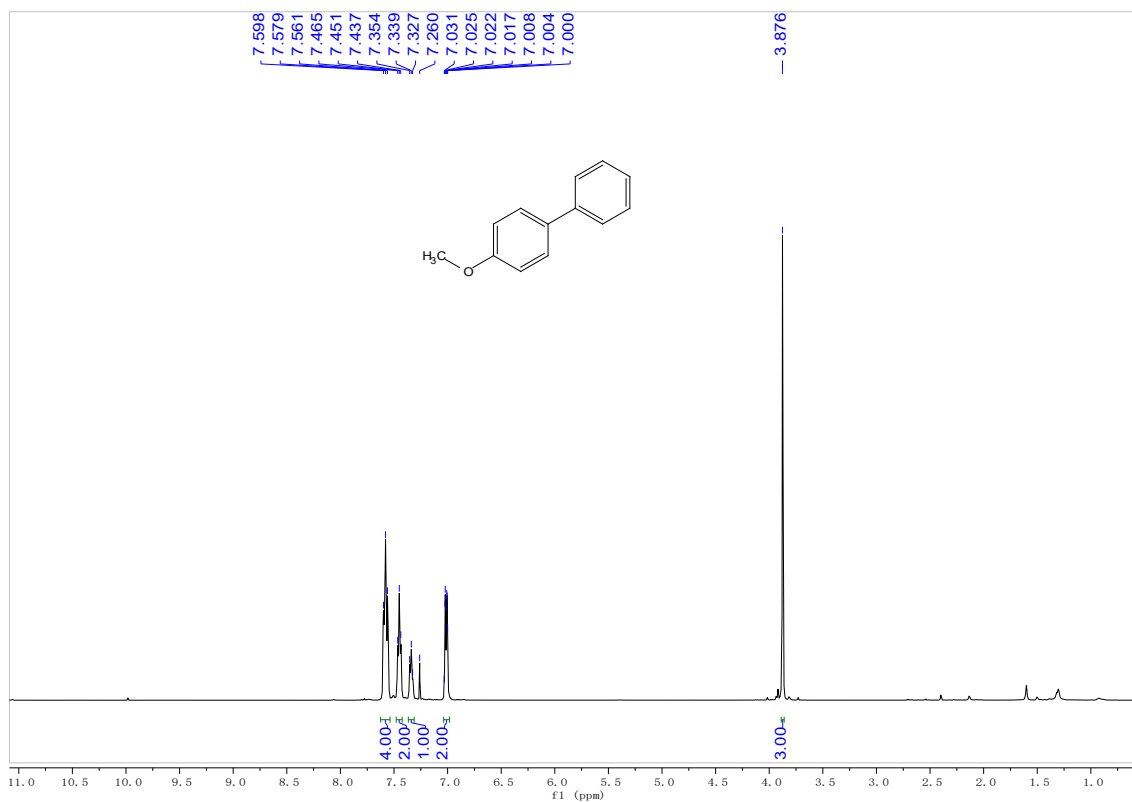

$^{13}\text{C}$  NMR (125 MHz,  $\text{CDCl}_3$ ) spectrum of compound **2e**

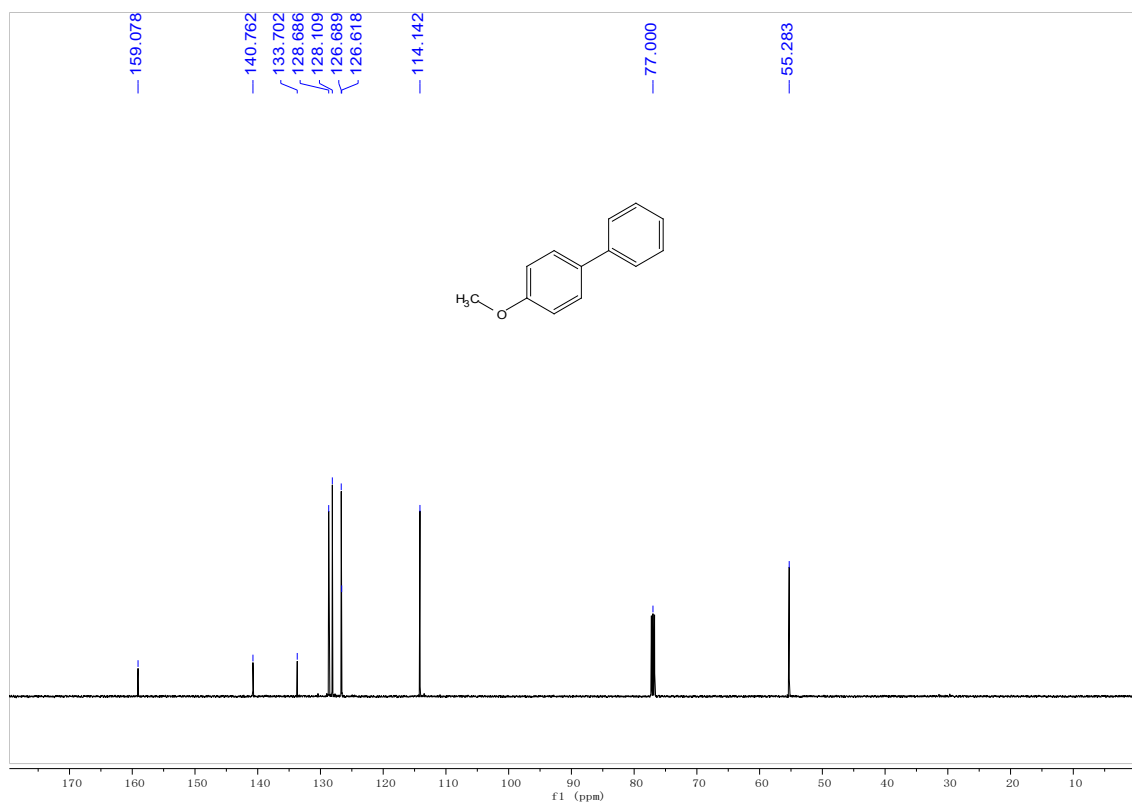

<sup>1</sup>H NMR (500 MHz, CD<sub>3</sub>OD) spectrum of compound **2f**

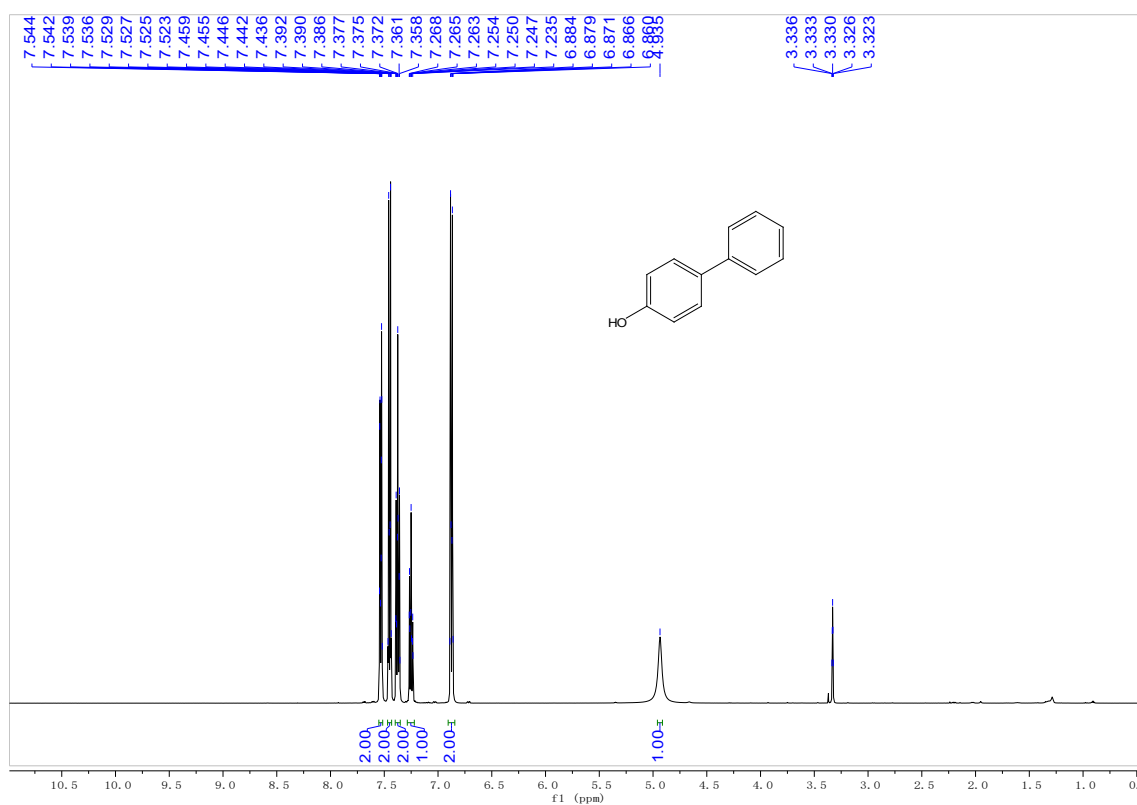

<sup>13</sup>C NMR (125 MHz, CD<sub>3</sub>OD) spectrum of compound **2f**

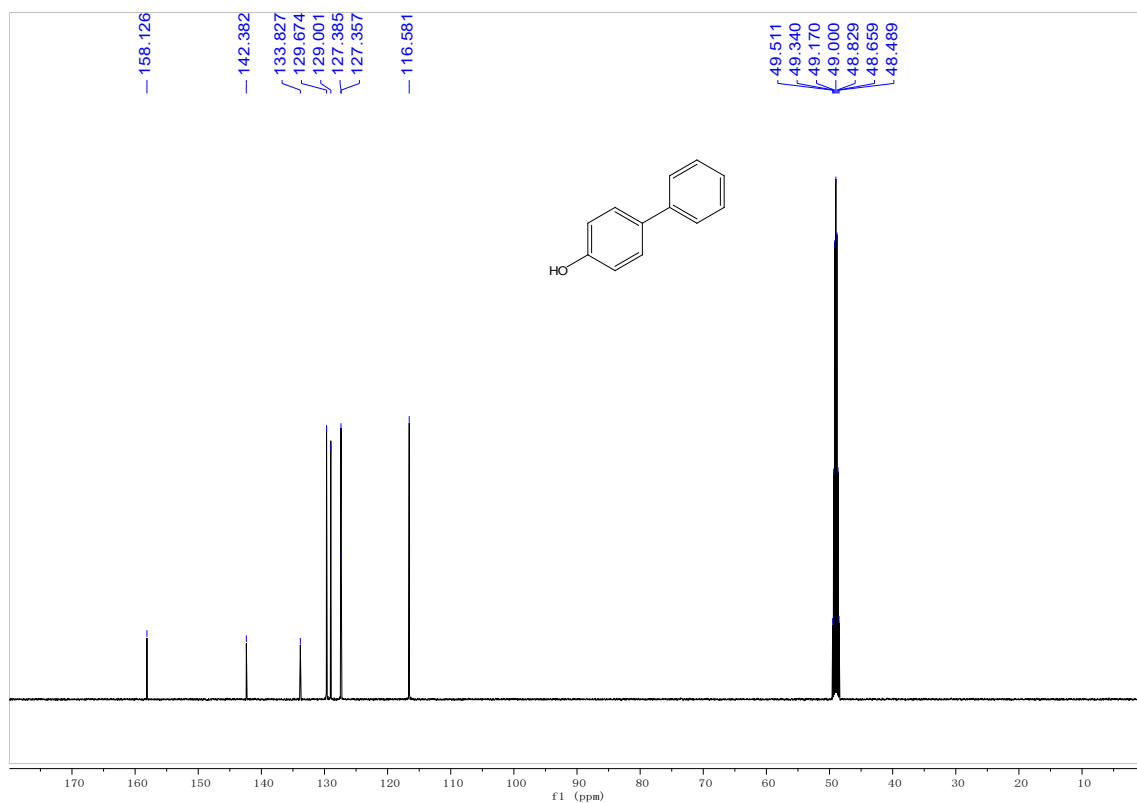

<sup>1</sup>H NMR (500 MHz, CDCl<sub>3</sub>) spectrum of compound **2g**

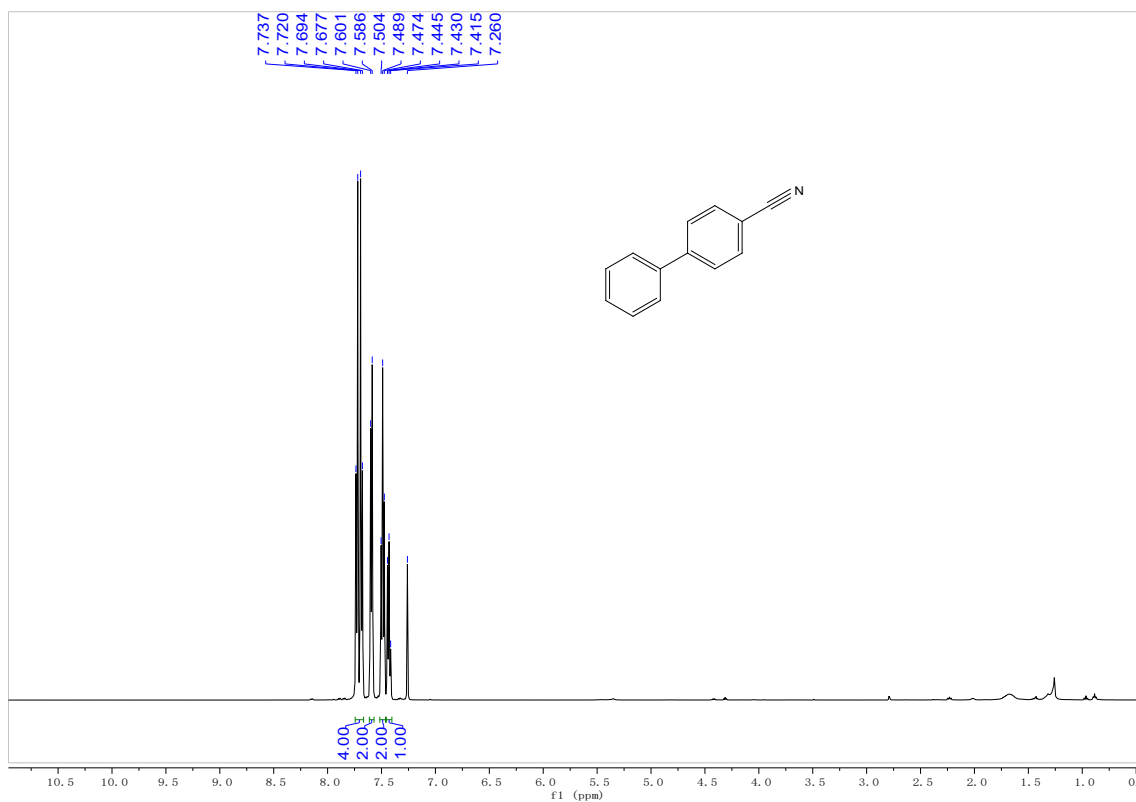

<sup>13</sup>C NMR (125 MHz, CDCl<sub>3</sub>) spectrum of compound **2g**

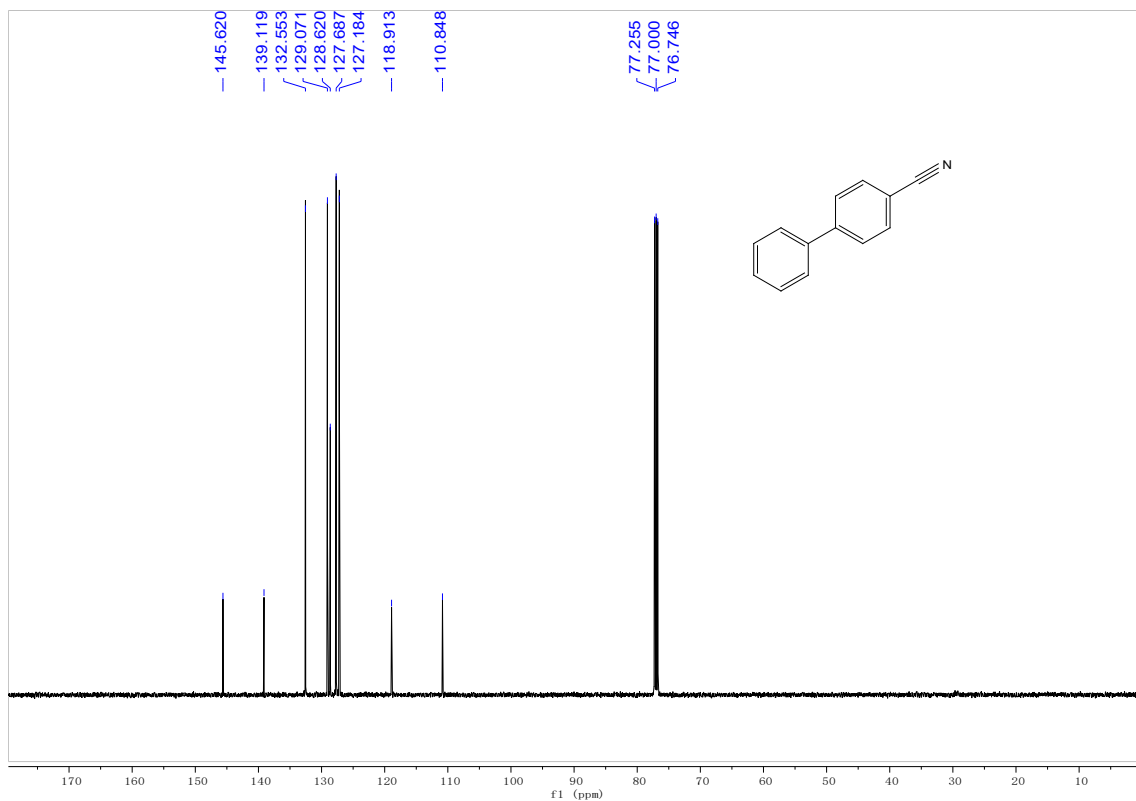



<sup>1</sup>H NMR (500 MHz, CDCl<sub>3</sub>) spectrum of compound **2h**

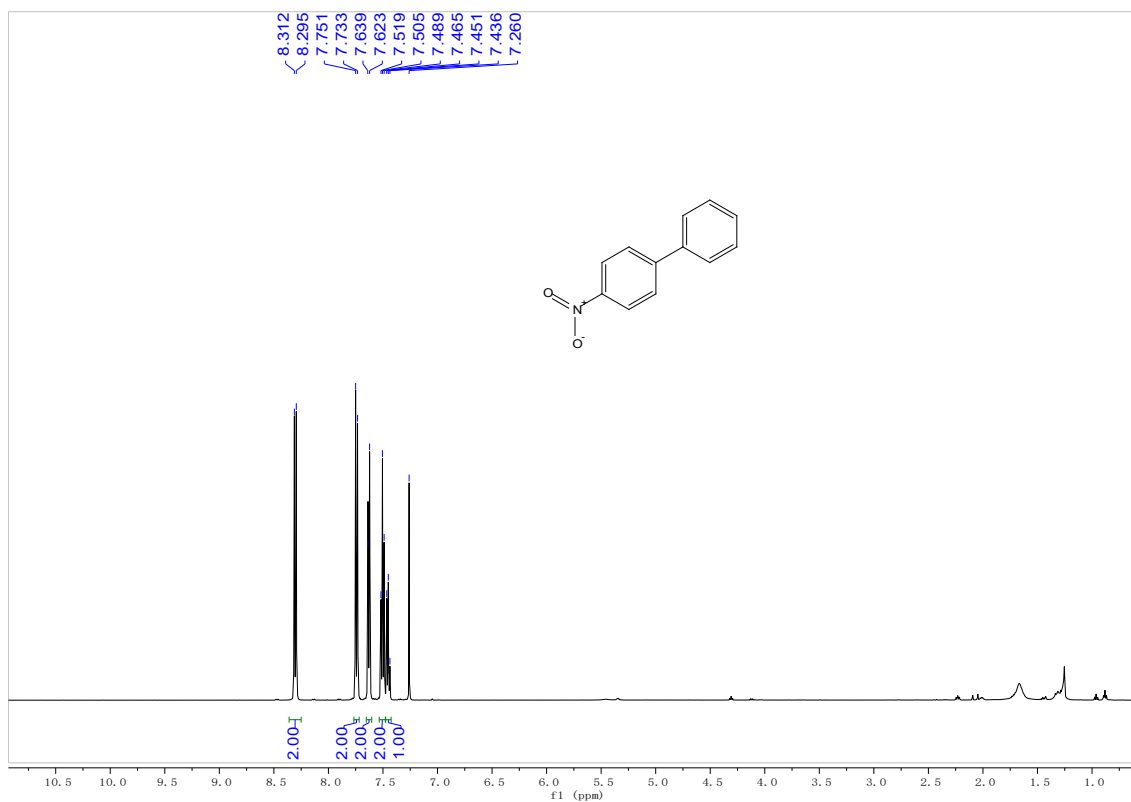

<sup>13</sup>C NMR (125 MHz, CDCl<sub>3</sub>) spectrum of compound **2h**

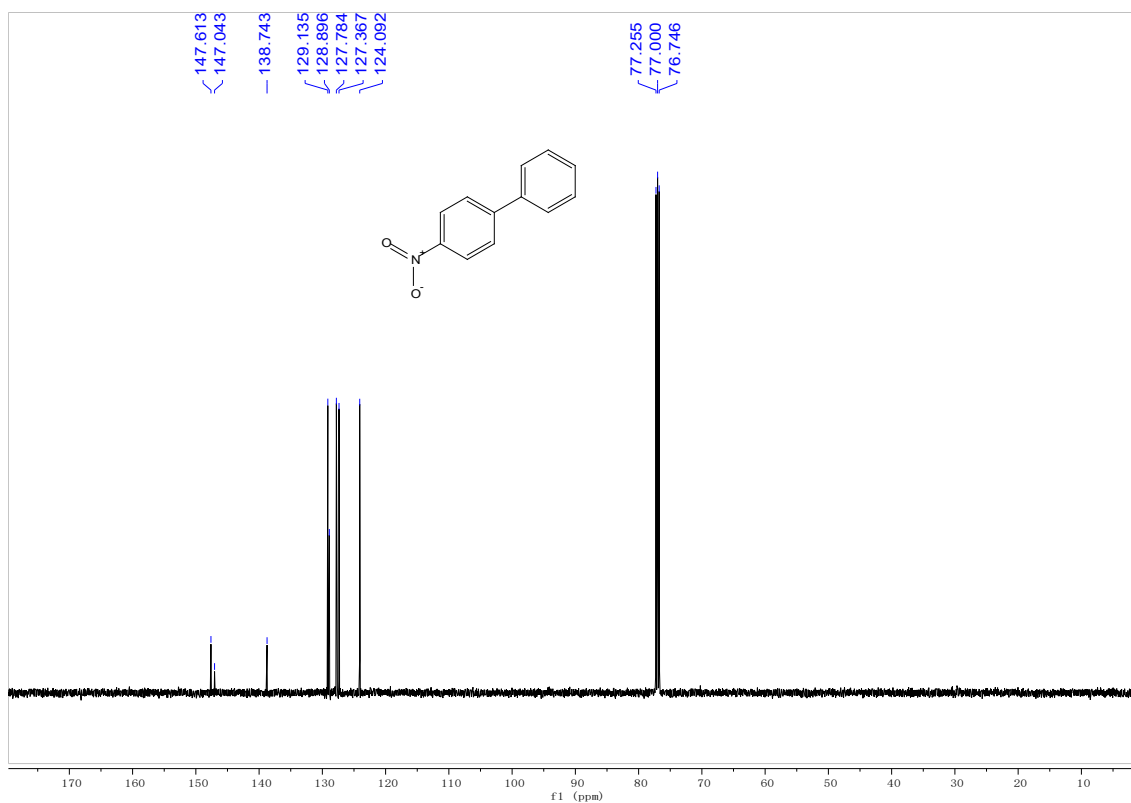

<sup>1</sup>H NMR (500 MHz, (CD<sub>3</sub>)<sub>2</sub>CO) spectrum of compound **2i**

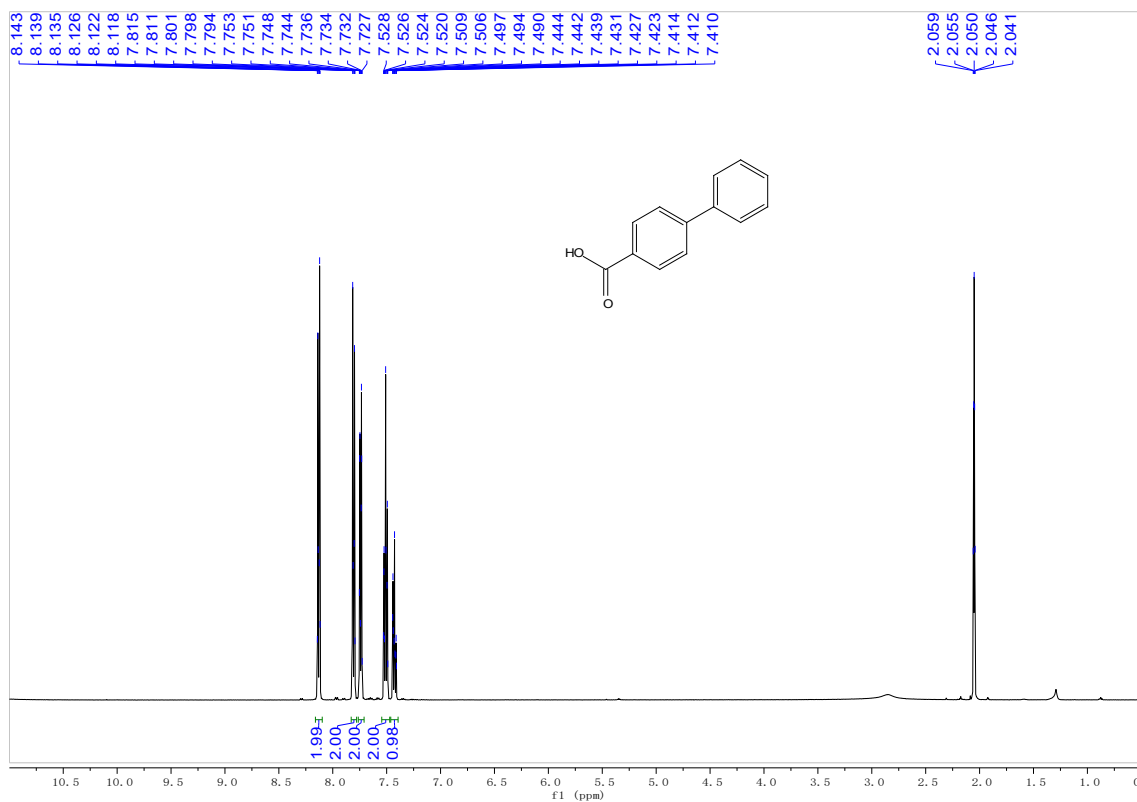

<sup>13</sup>C NMR (125 MHz, (CD<sub>3</sub>)<sub>2</sub>CO) spectrum of compound **2i**

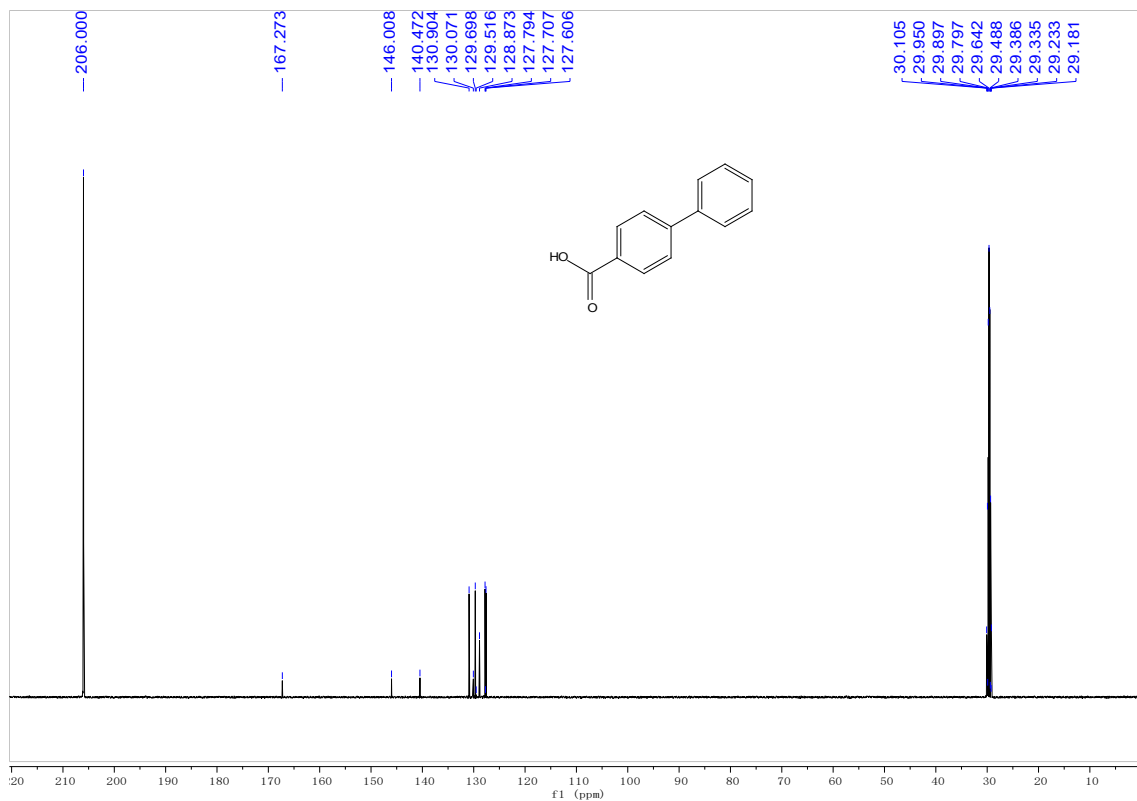

<sup>1</sup>H NMR (500 MHz, CDCl<sub>3</sub>) spectrum of compound **2j**

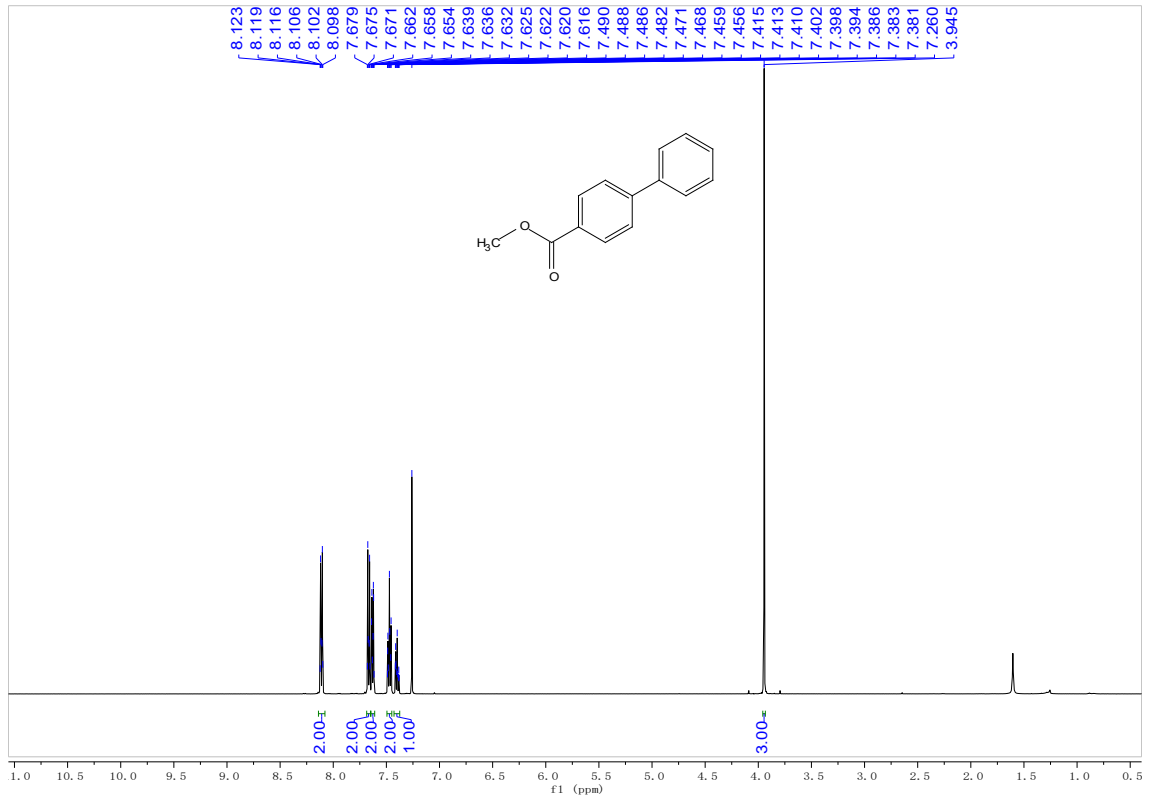

<sup>13</sup>C NMR (125 MHz, CDCl<sub>3</sub>) spectrum of compound **2j**

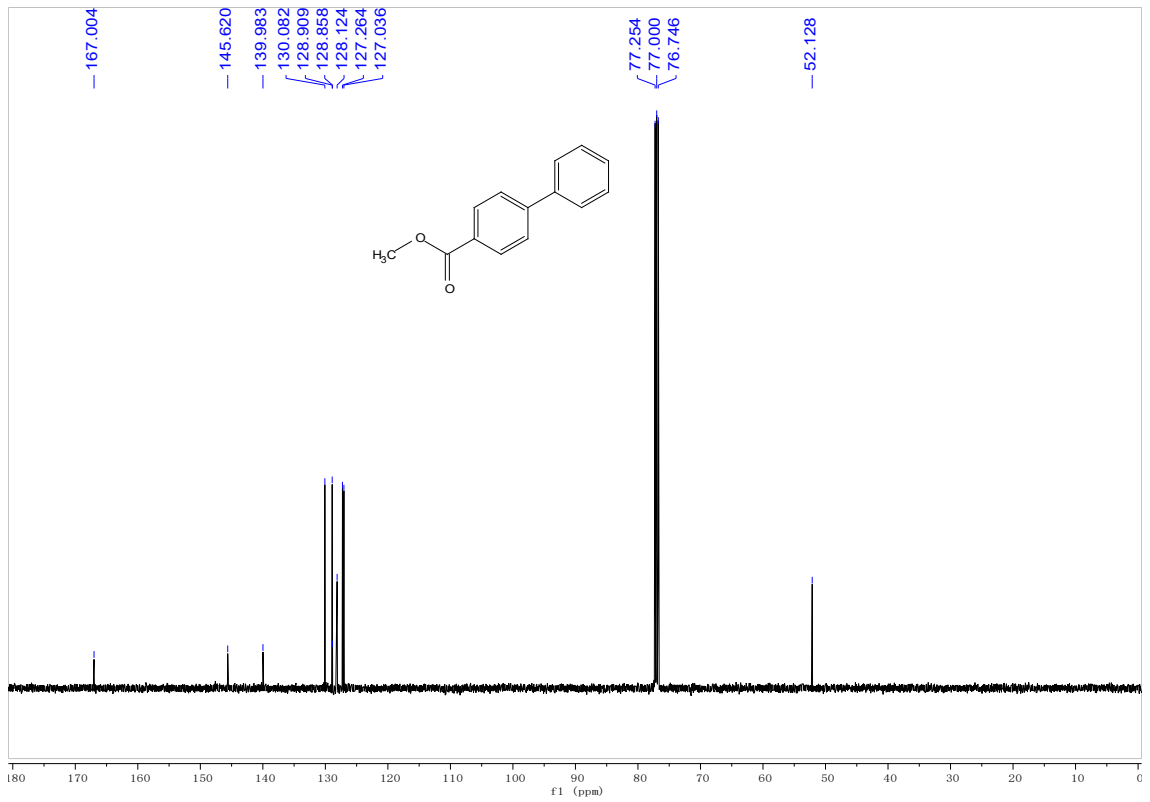

<sup>1</sup>H NMR (500 MHz, CDCl<sub>3</sub>) spectrum of compound **2k**

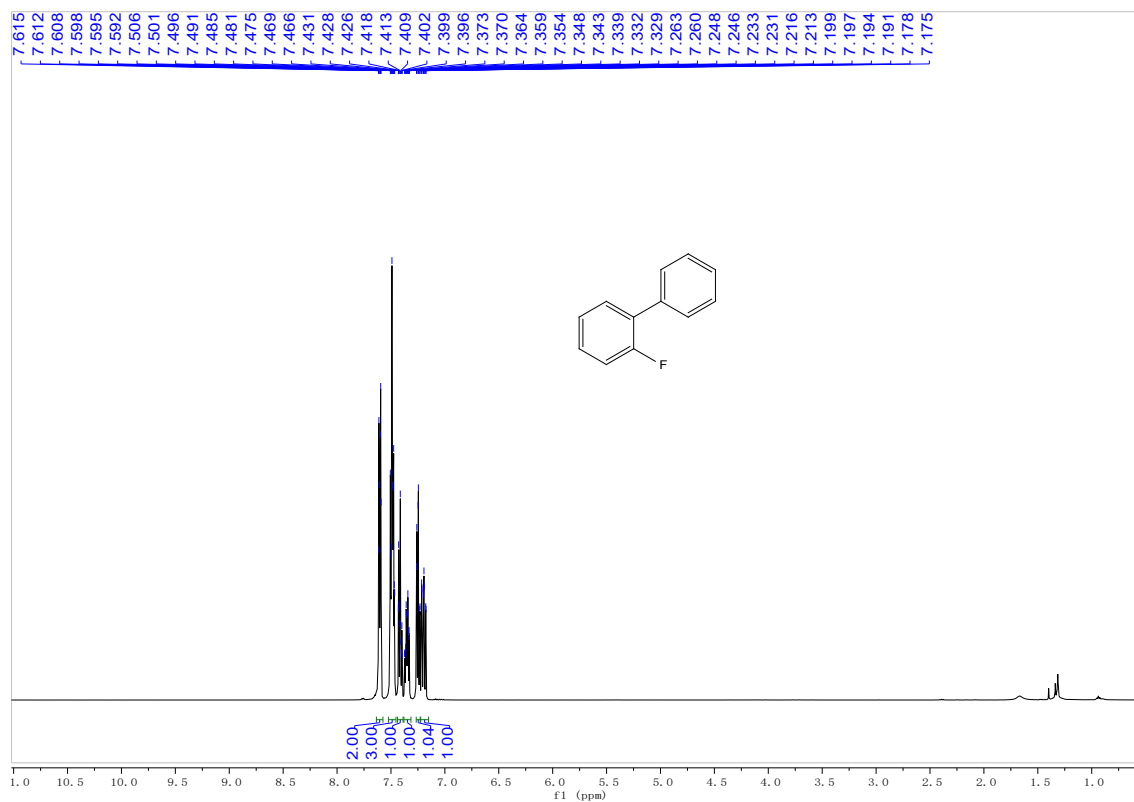

<sup>13</sup>C NMR (125 MHz, CDCl<sub>3</sub>) spectrum of compound **2k**

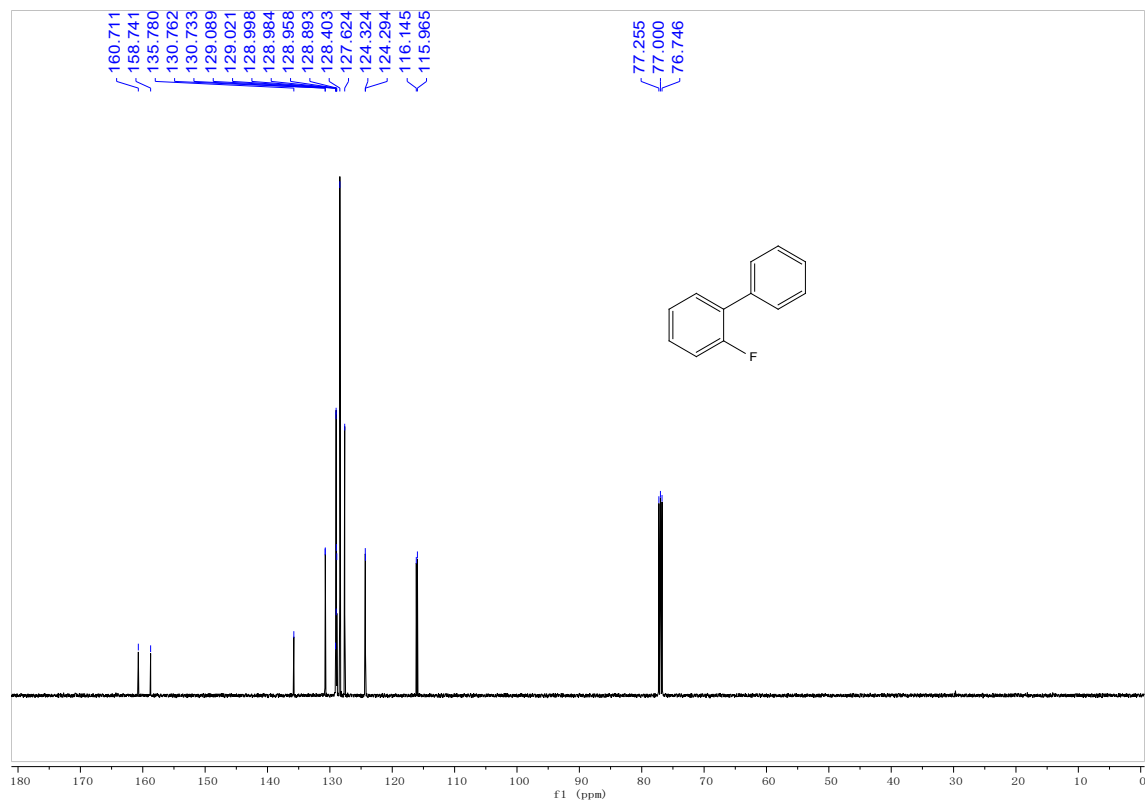

$^1\text{H}$  NMR (500 MHz,  $\text{CDCl}_3$ ) spectrum of compound **21**

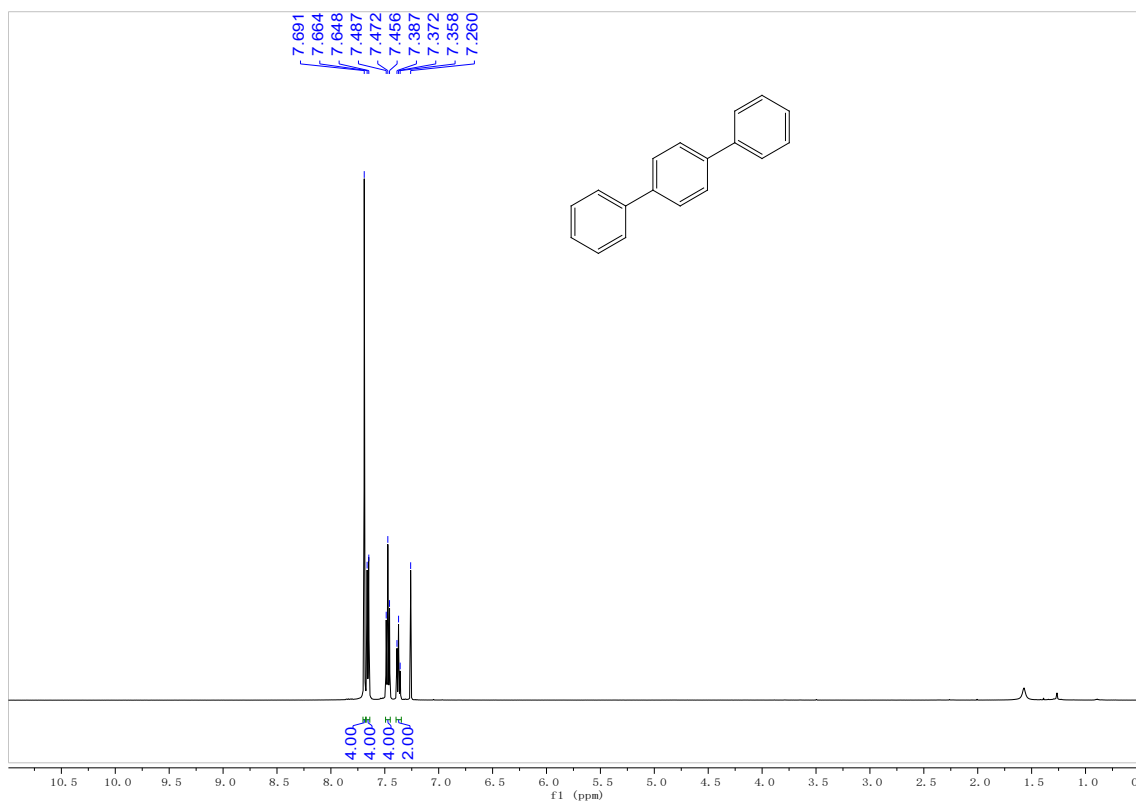

$^{13}\text{C}$  NMR (125 MHz,  $\text{CDCl}_3$ ) spectrum of compound **21**

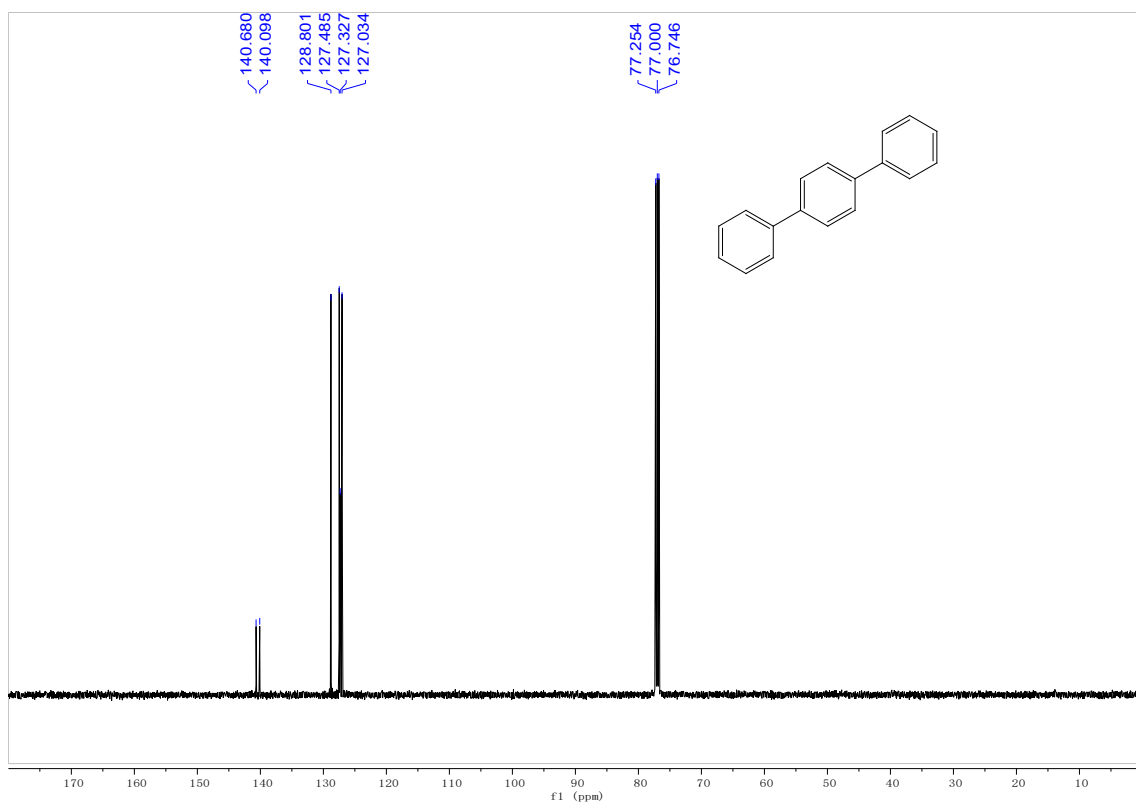

$^1\text{H}$  NMR (500 MHz,  $\text{CDCl}_3$ ) spectrum of compound **2m**

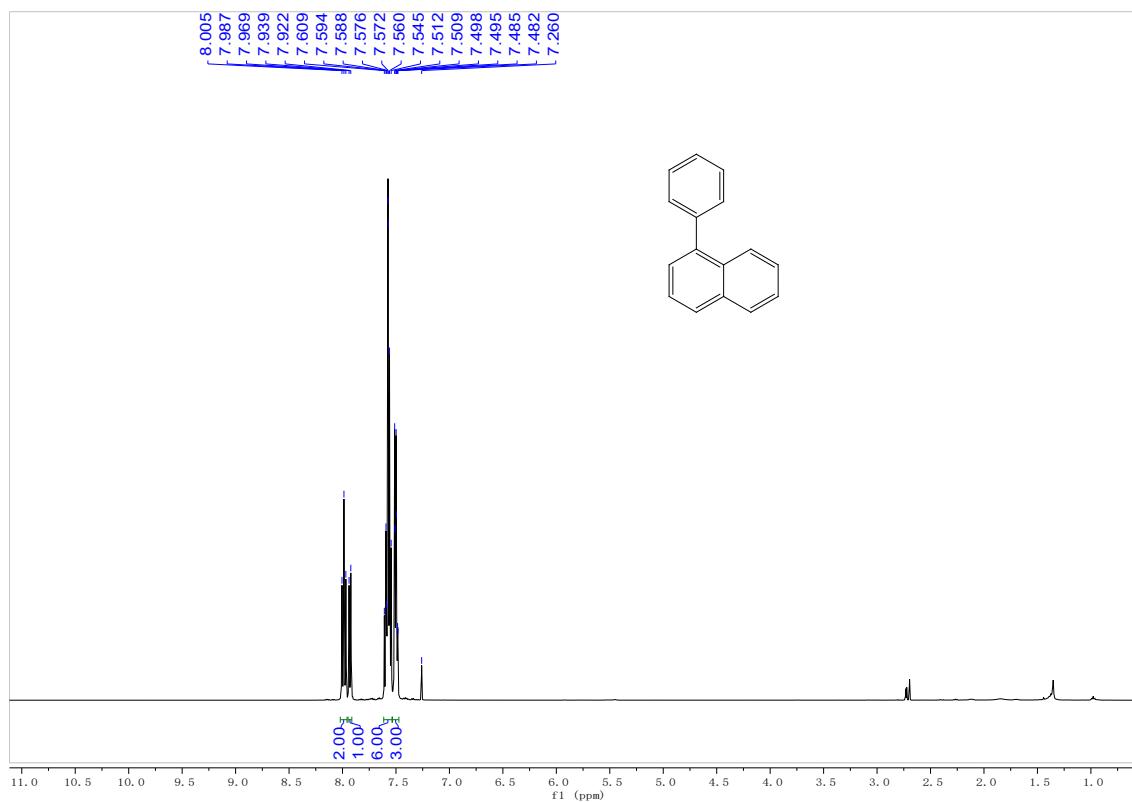

$^{13}\text{C}$  NMR (125 MHz,  $\text{CDCl}_3$ ) spectrum of compound **2m**

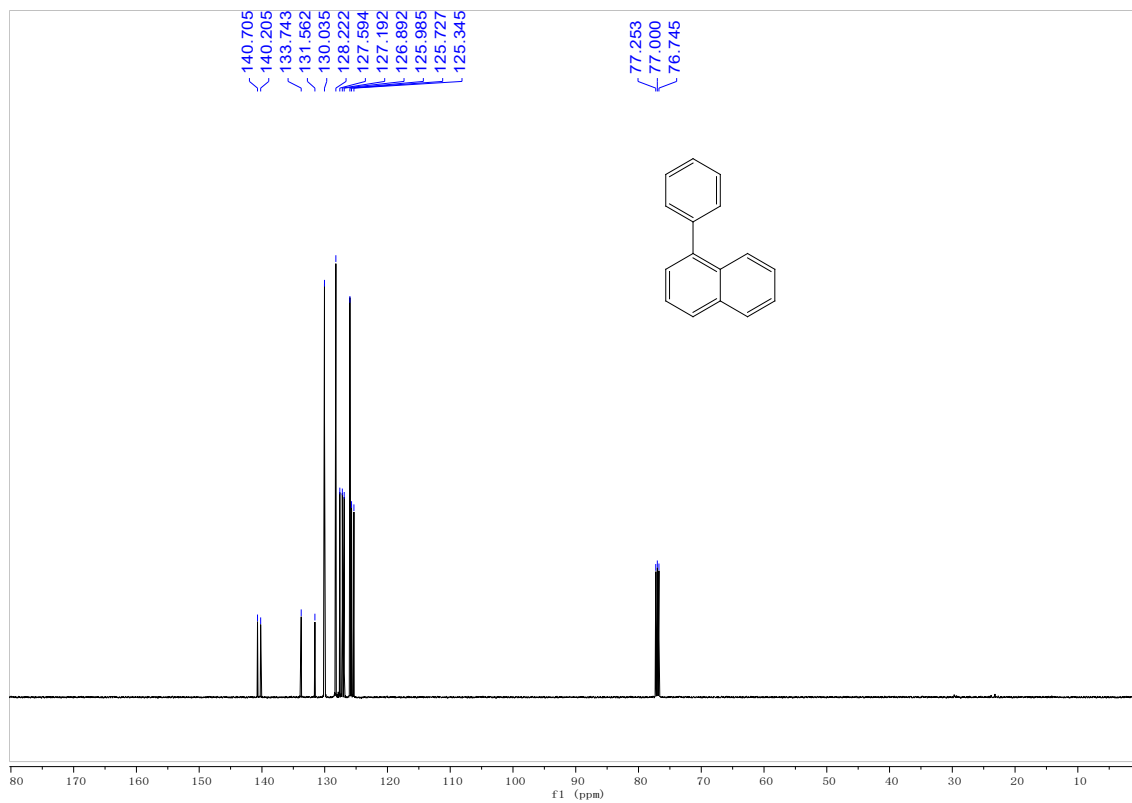

<sup>1</sup>H NMR (500 MHz, CDCl<sub>3</sub>) spectrum of compound **2n**

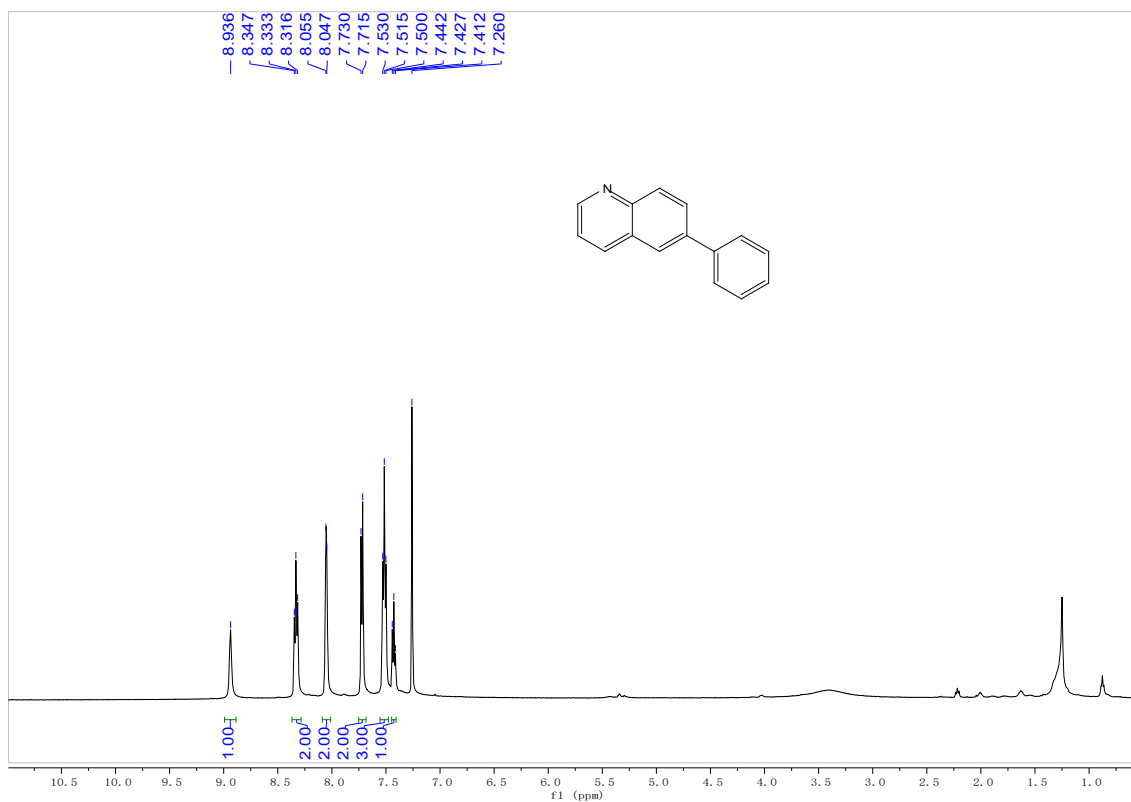

<sup>13</sup>C NMR (125 MHz, CDCl<sub>3</sub>) spectrum of compound **2n**

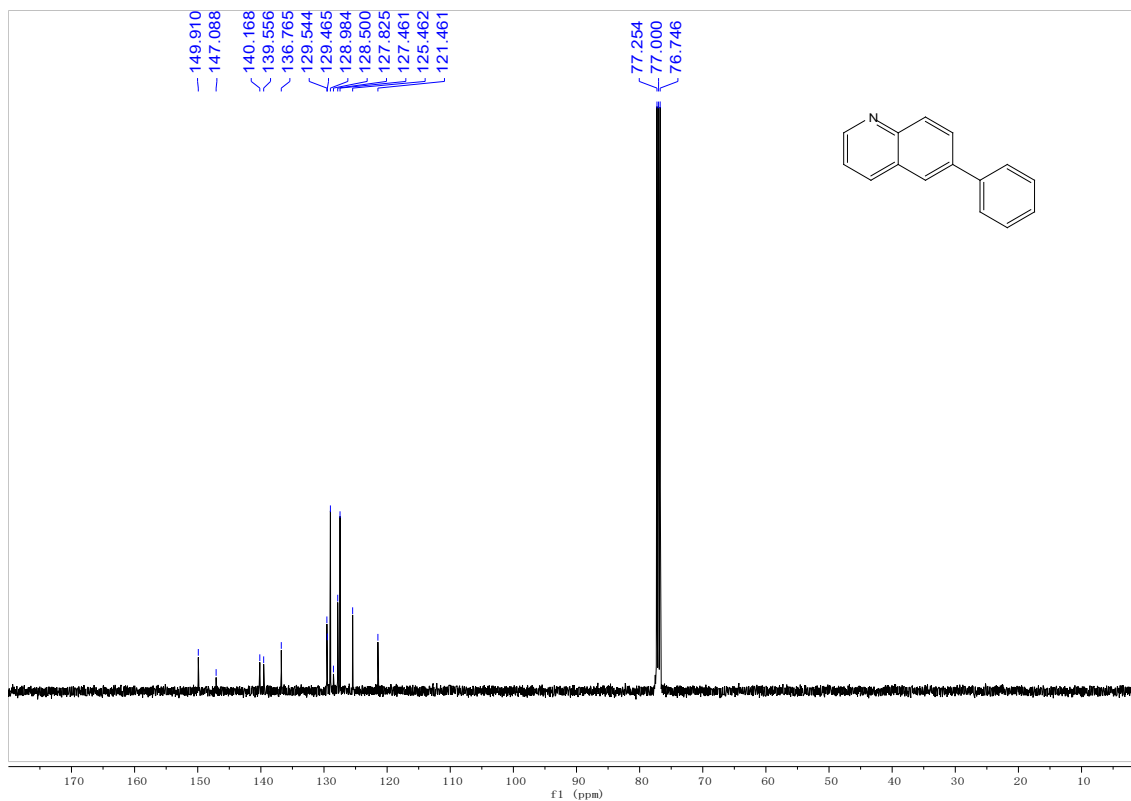

<sup>1</sup>H NMR (500 MHz, CDCl<sub>3</sub>) spectrum of compound **2o**

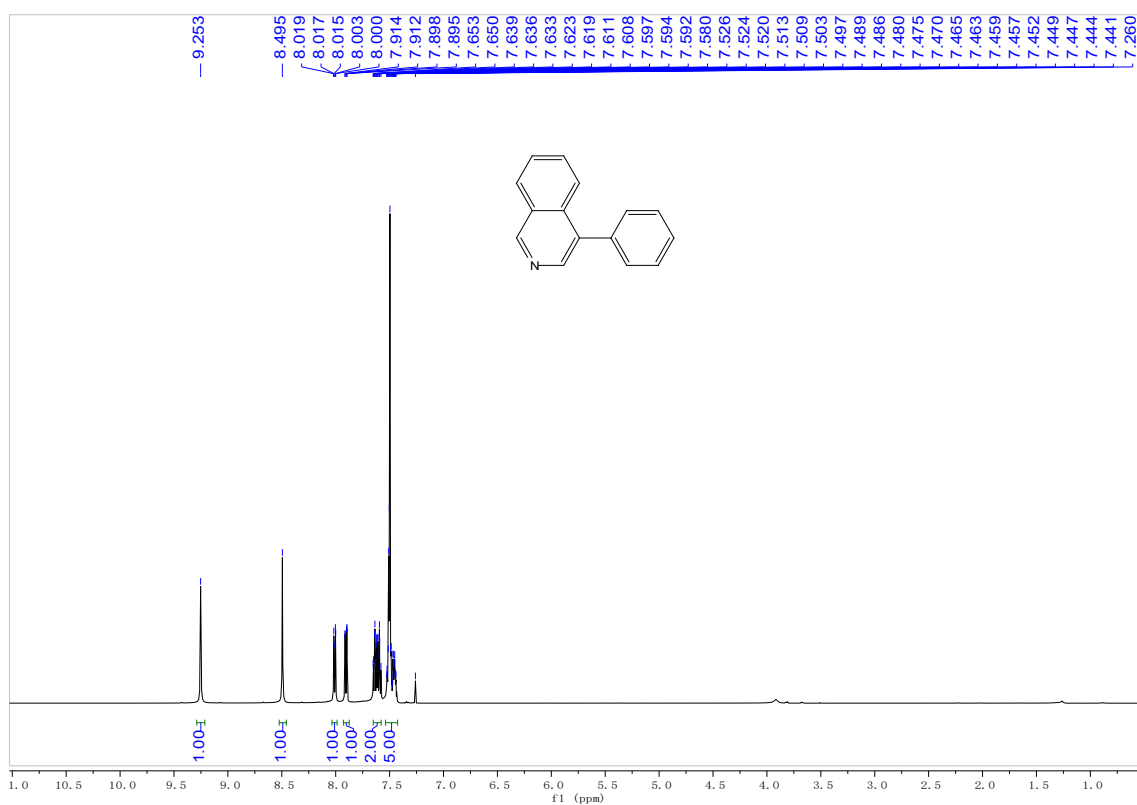

<sup>13</sup>C NMR (125 MHz, CDCl<sub>3</sub>) spectrum of compound **2o**

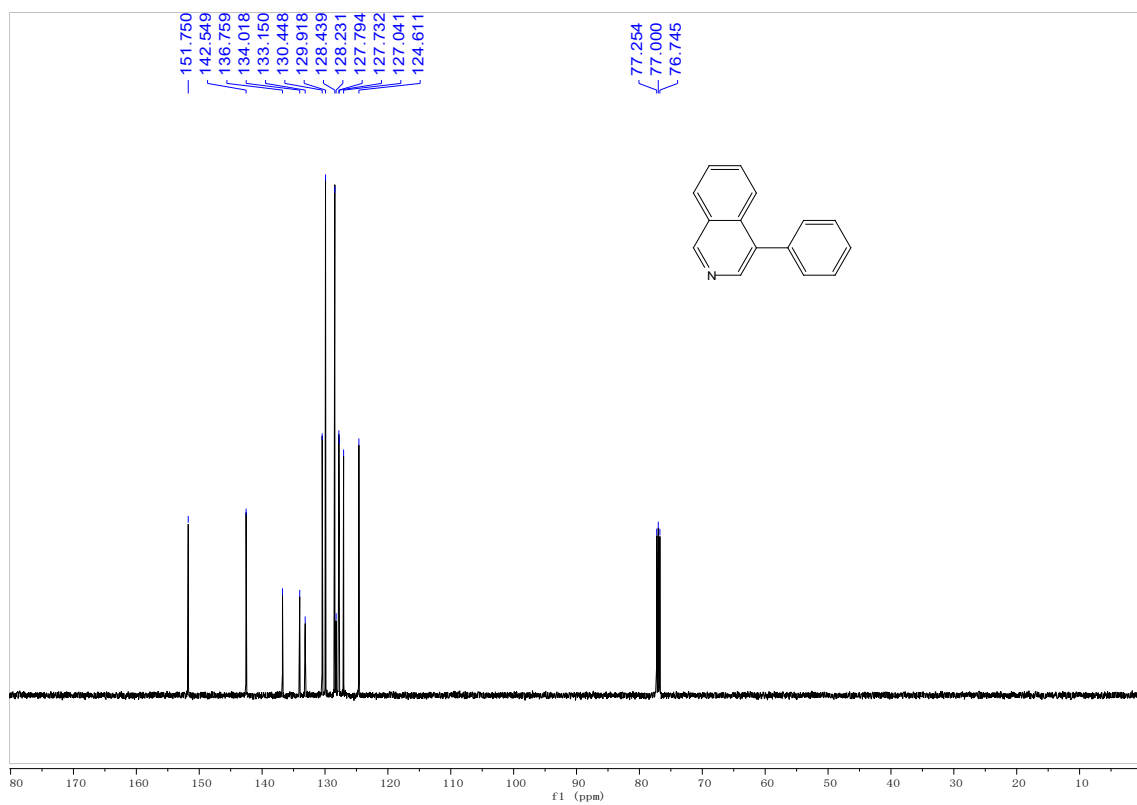



<sup>1</sup>H NMR (500 MHz, CDCl<sub>3</sub>) spectrum of compound **2p**

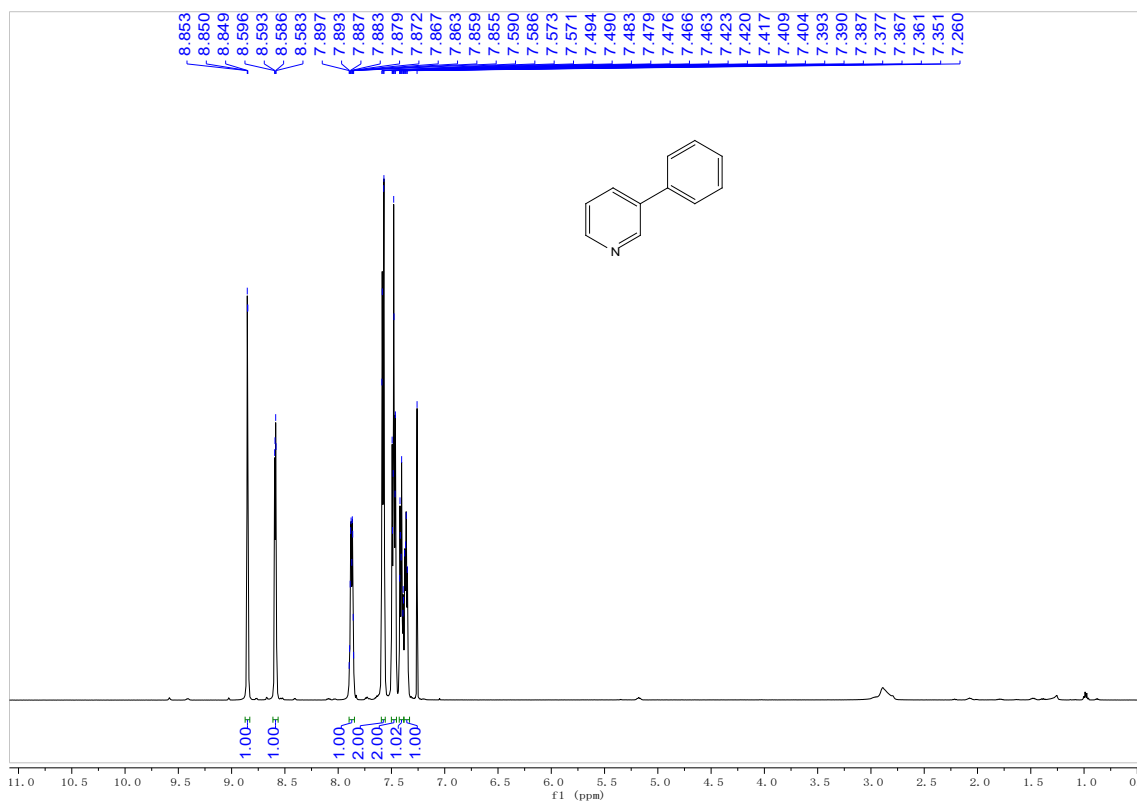

<sup>13</sup>C NMR (125 MHz, CDCl<sub>3</sub>) spectrum of compound **2p**

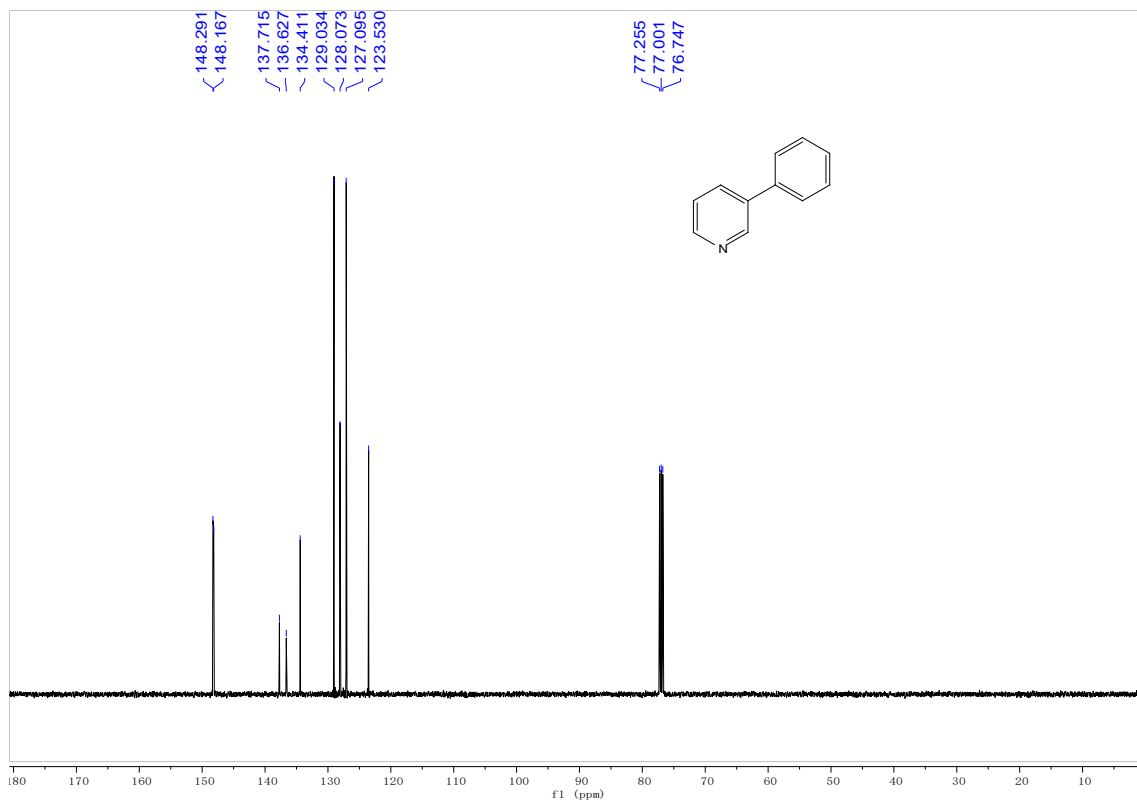

<sup>1</sup>H NMR (500 MHz, CDCl<sub>3</sub>) spectrum of compound **2q**

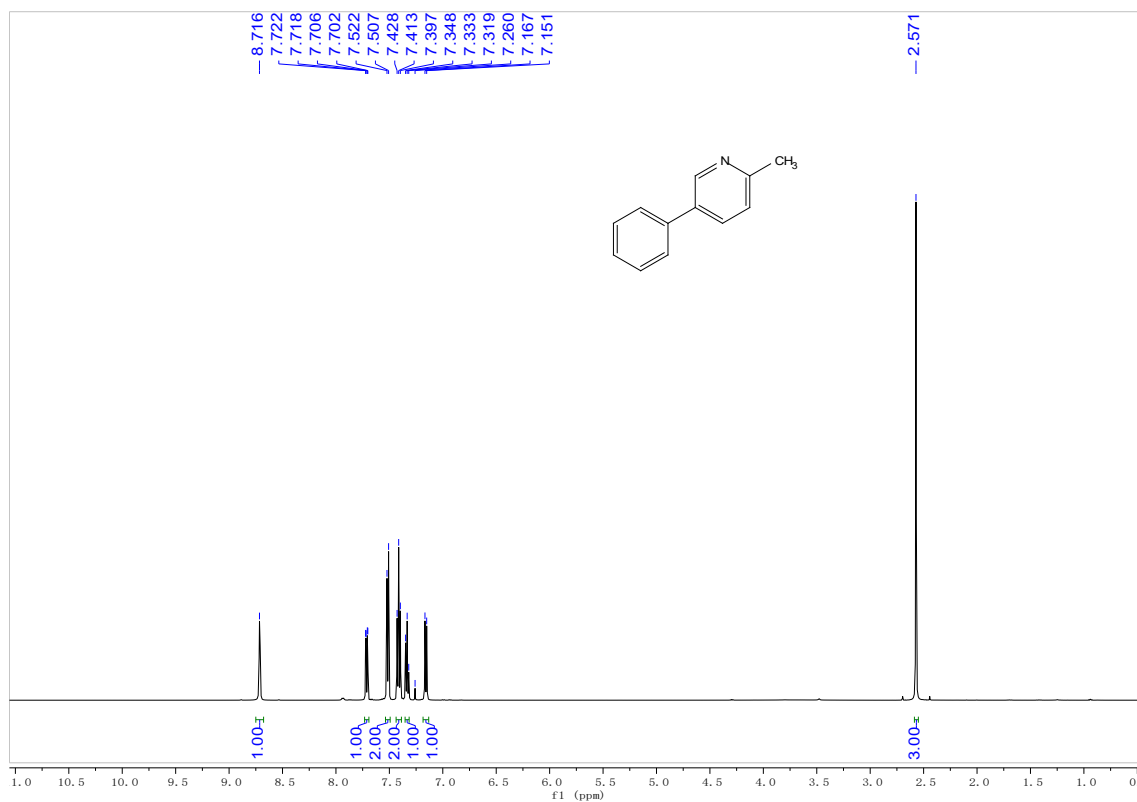

<sup>13</sup>C NMR (125 MHz, CDCl<sub>3</sub>) spectrum of compound **2q**

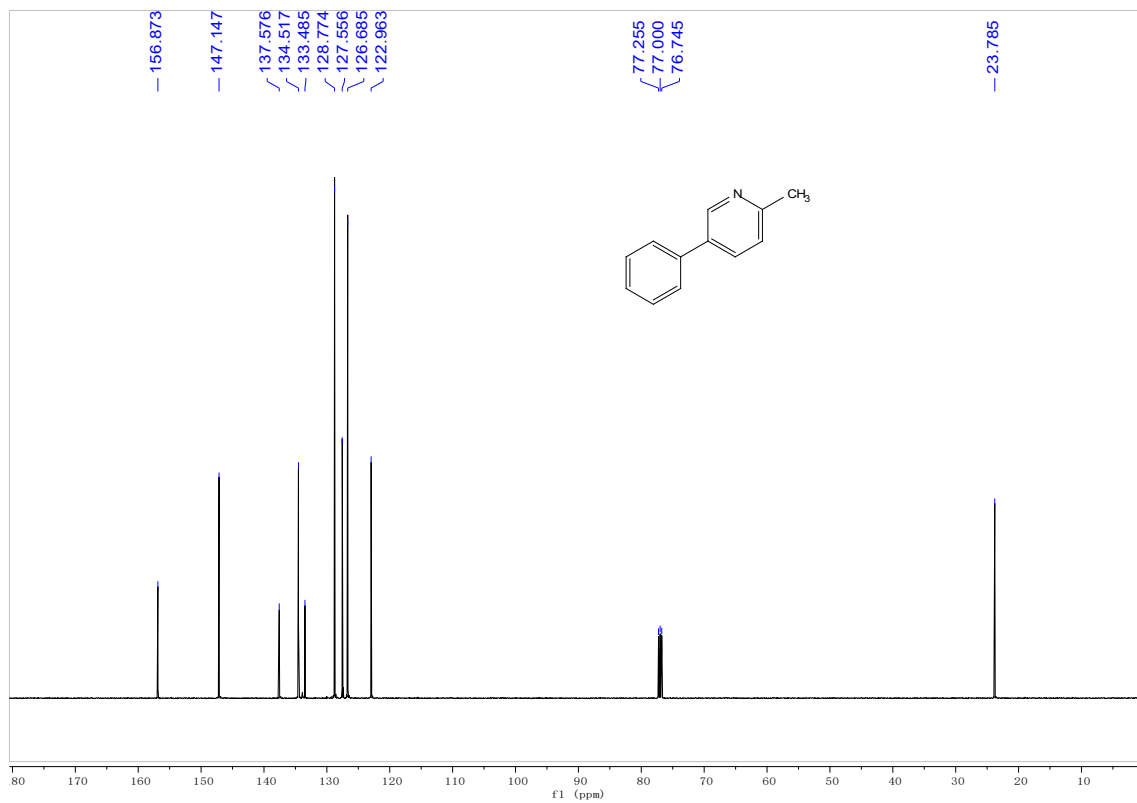

$^1\text{H}$  NMR (500 MHz,  $\text{CDCl}_3$ ) spectrum of compound **2r**

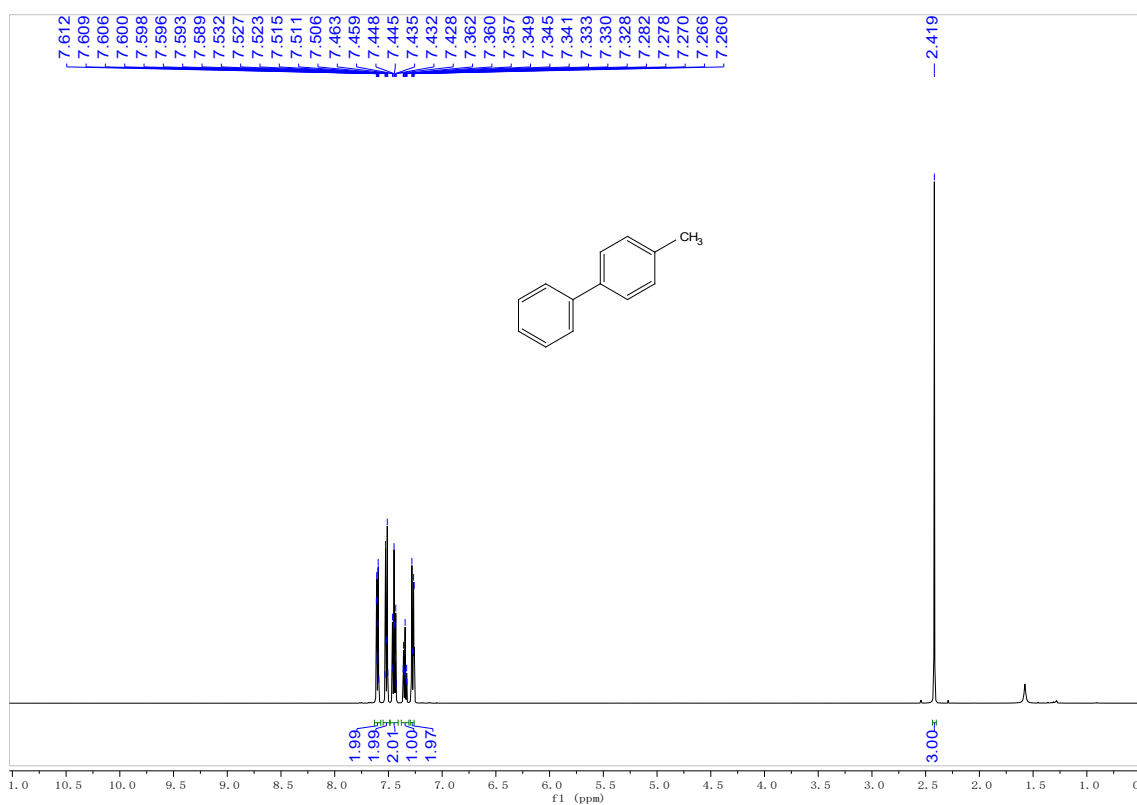

$^{13}\text{C}$  NMR (125 MHz,  $\text{CDCl}_3$ ) spectrum of compound **2r**

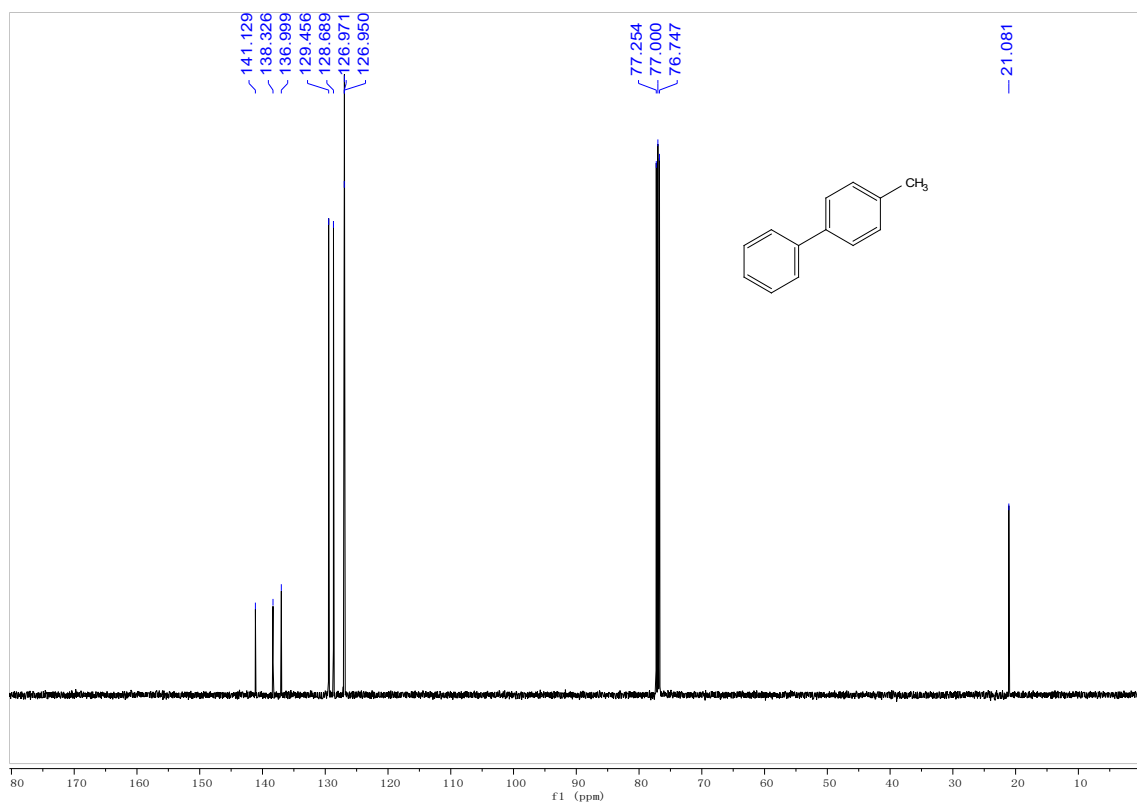

<sup>1</sup>H NMR (500 MHz, CDCl<sub>3</sub>) spectrum of compound **2s**

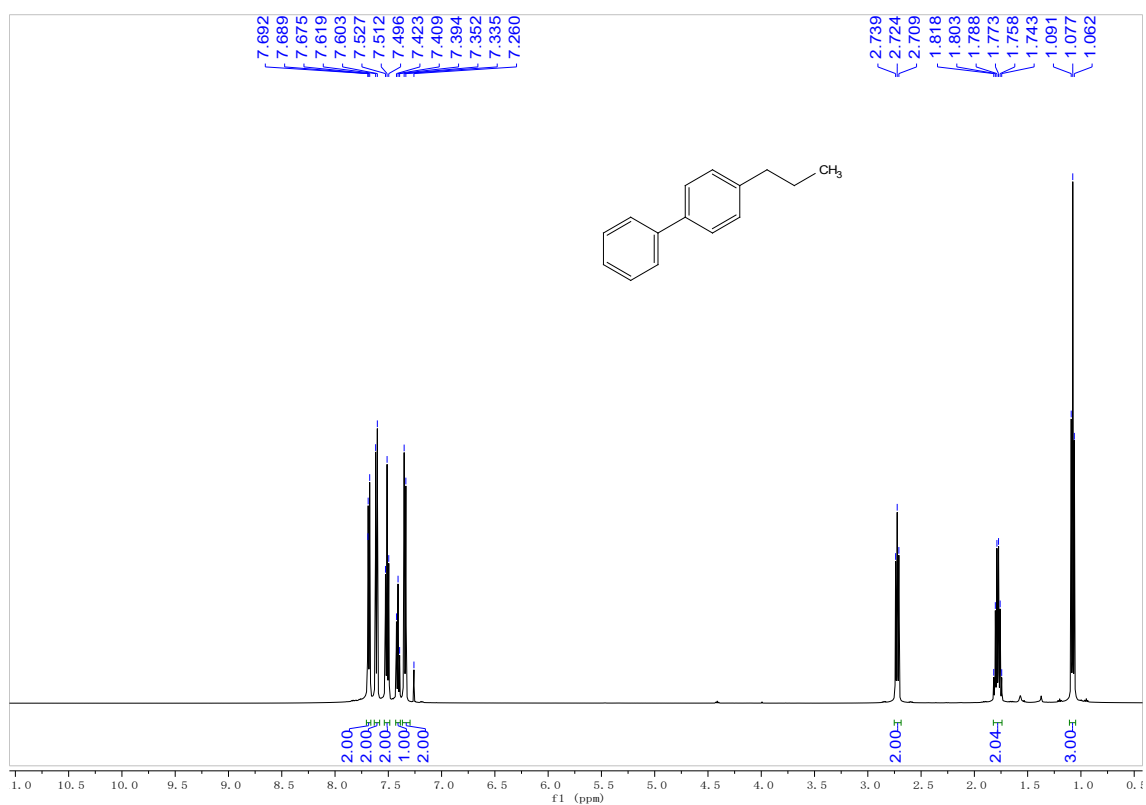

<sup>13</sup>C NMR (125 MHz, CDCl<sub>3</sub>) spectrum of compound **2s**

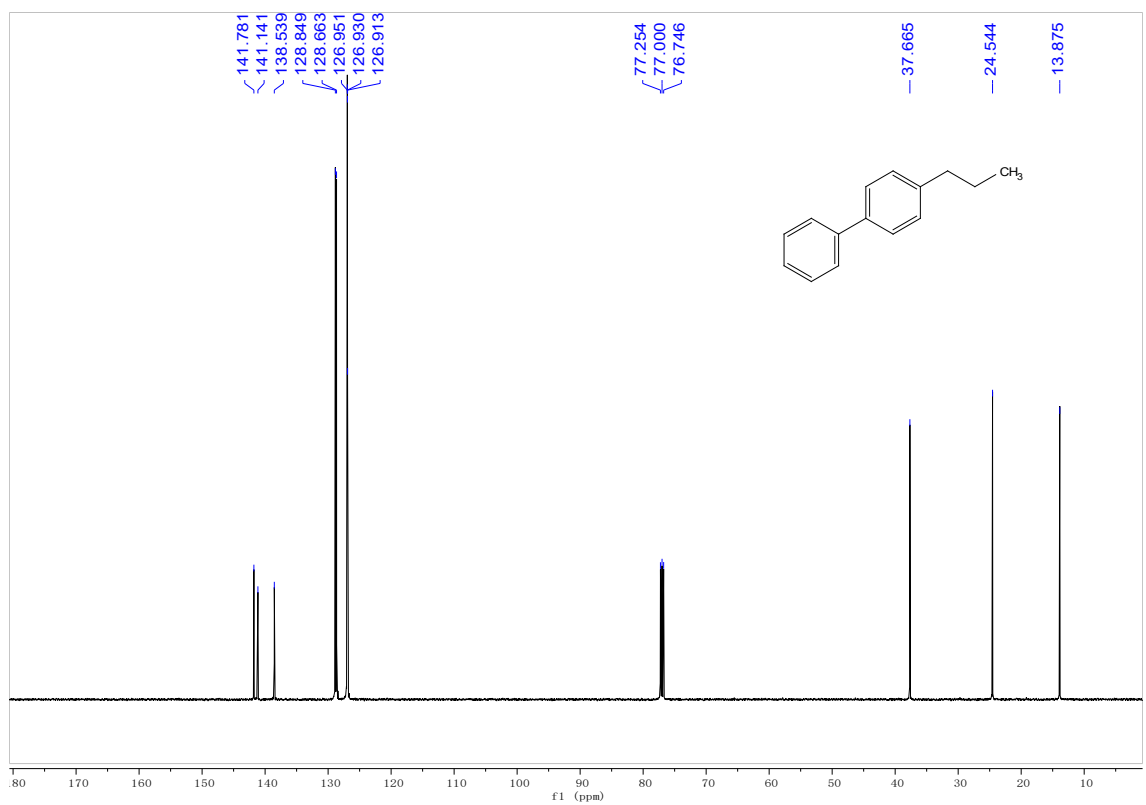

<sup>1</sup>H NMR (500 MHz, CDCl<sub>3</sub>) spectrum of compound **2t**

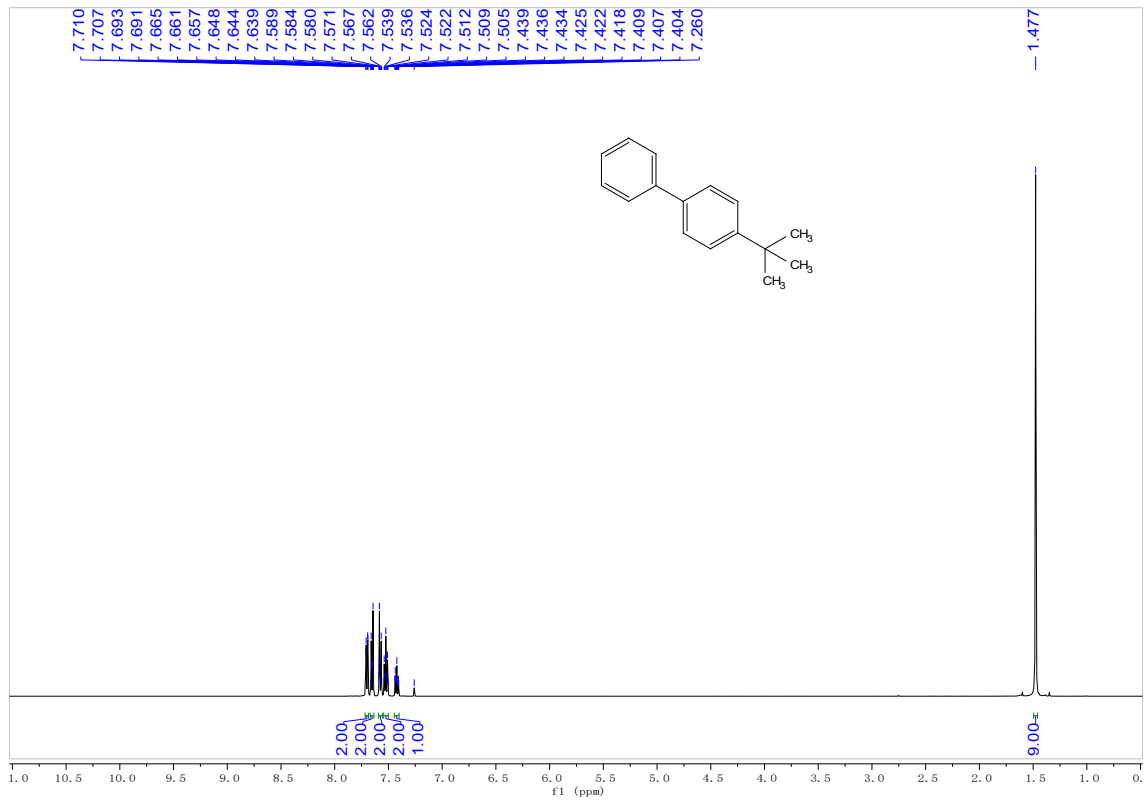

<sup>13</sup>C NMR (125 MHz, CDCl<sub>3</sub>) spectrum of compound **2t**

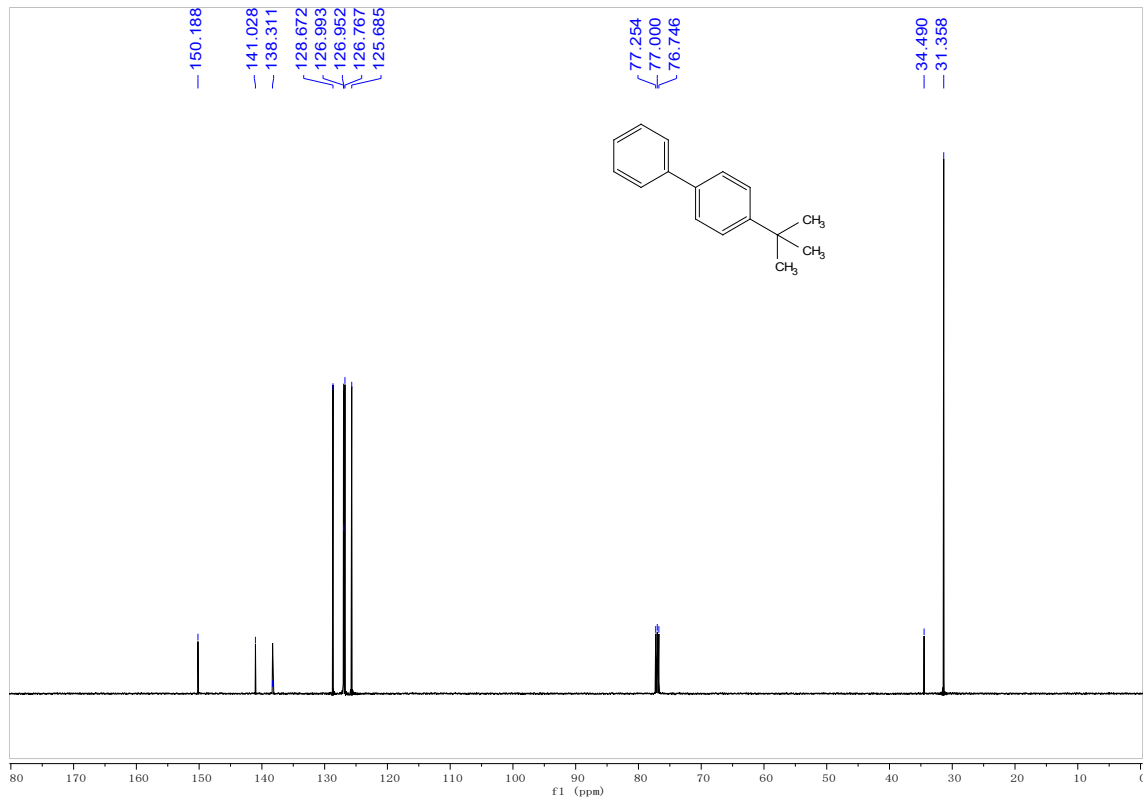

<sup>1</sup>H NMR (500 MHz, CDCl<sub>3</sub>) spectrum of compound **2u**

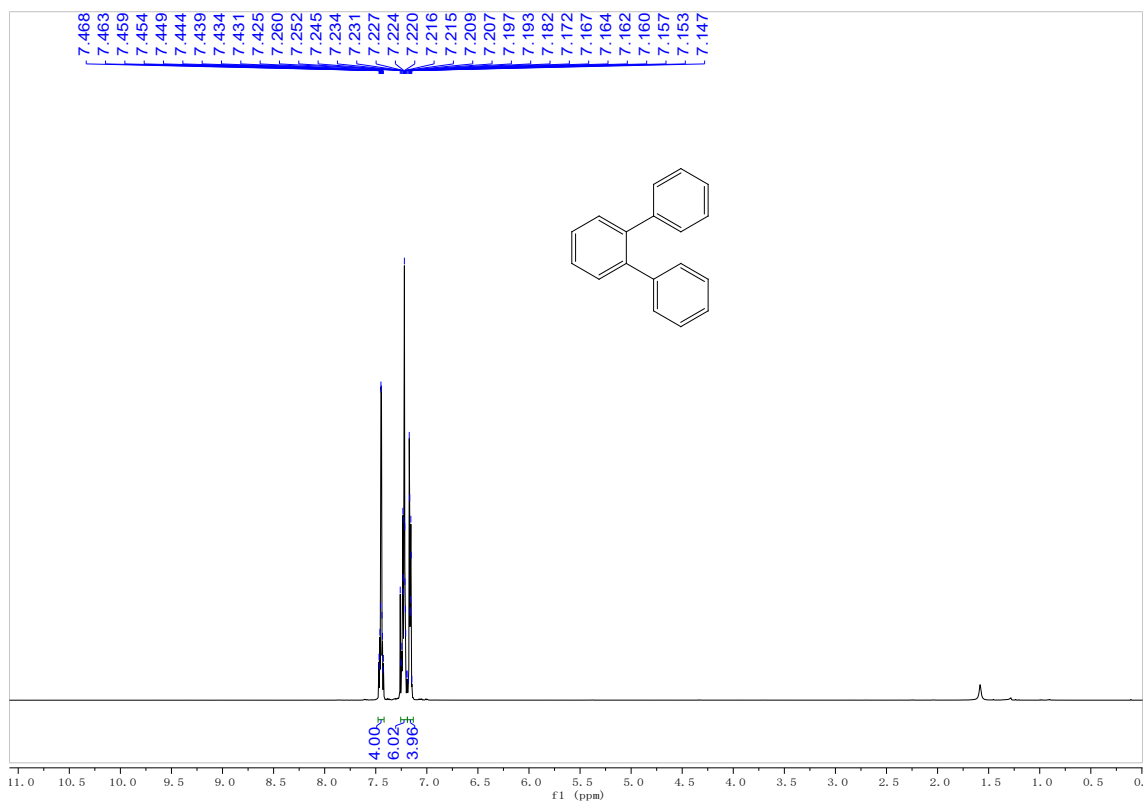

<sup>13</sup>C NMR (125 MHz, CDCl<sub>3</sub>) spectrum of compound **2u**

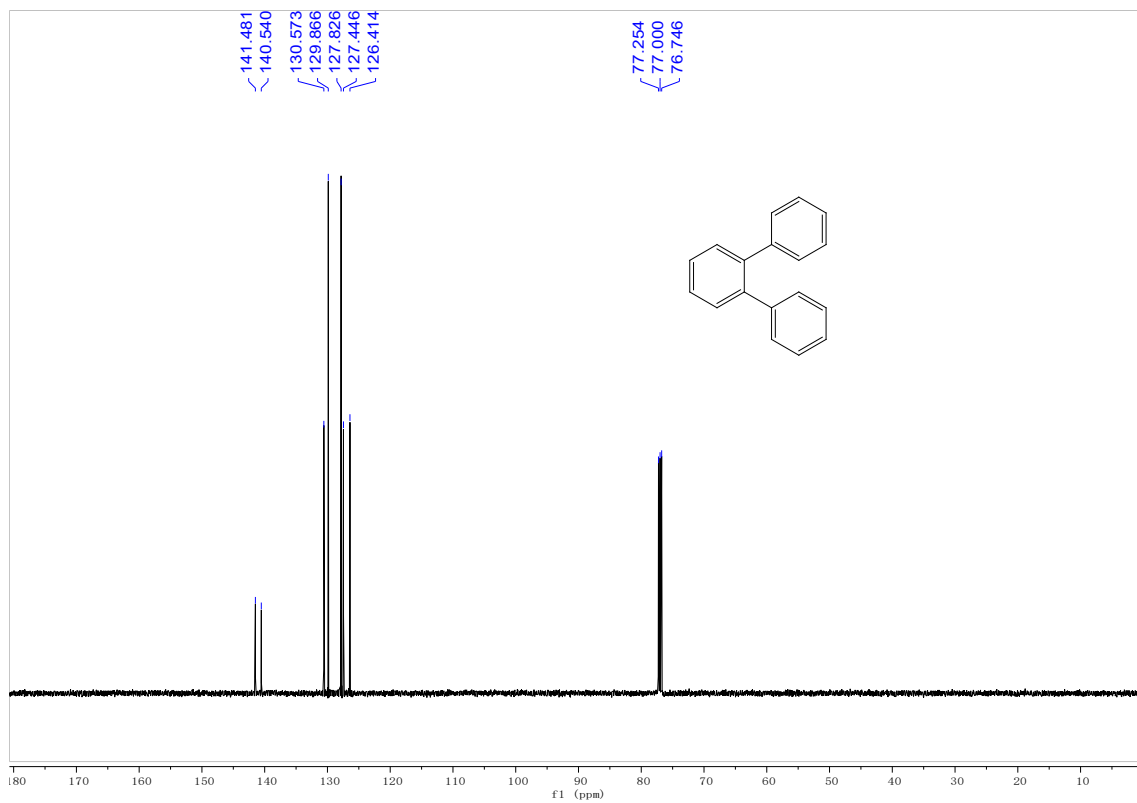

$^1\text{H}$  NMR (500 MHz,  $\text{CDCl}_3$ ) spectrum of compound **2v**

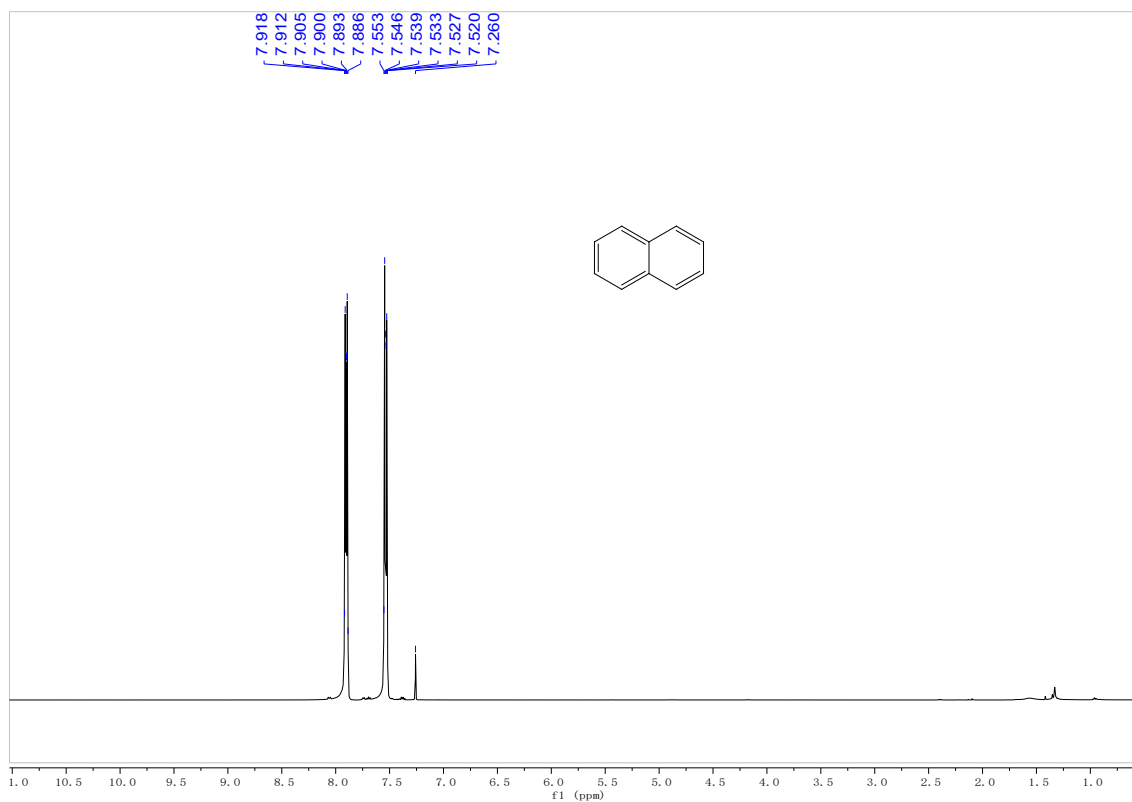

$^{13}\text{C}$  NMR (125 MHz,  $\text{CDCl}_3$ ) spectrum of compound **2v**

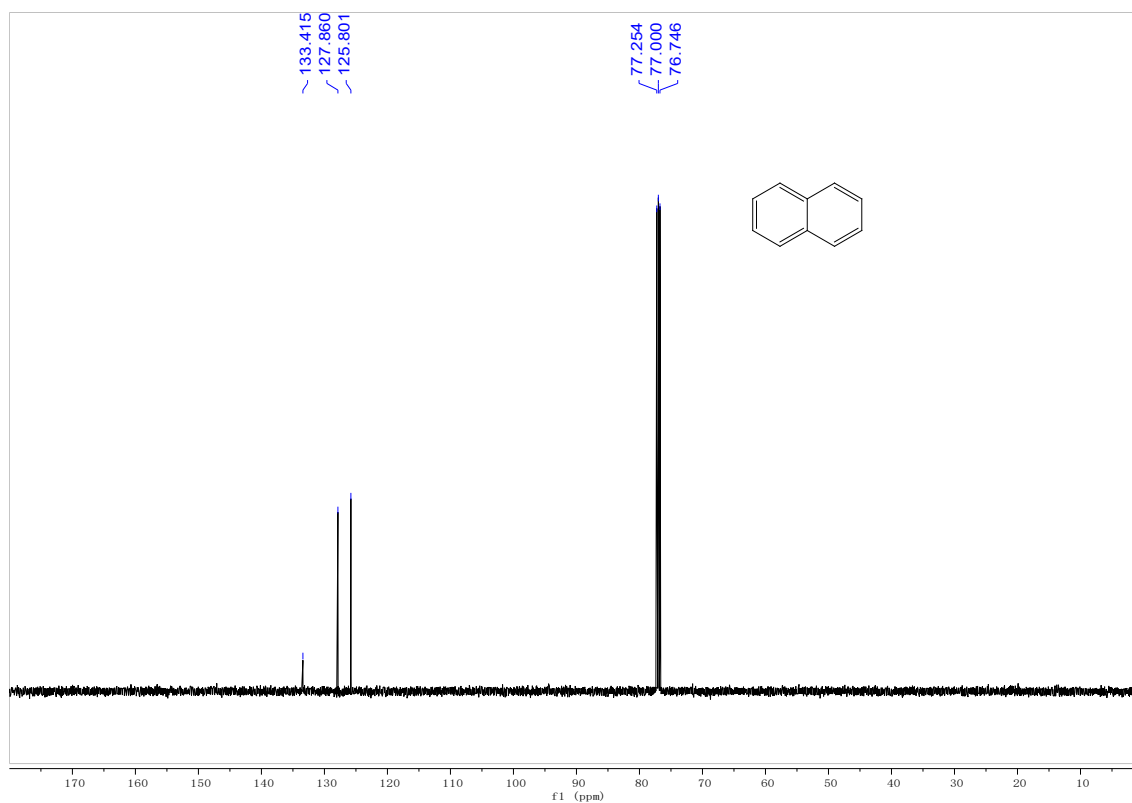

$^1\text{H}$  NMR (500 MHz,  $\text{CDCl}_3$ ) spectrum of compound **2w**

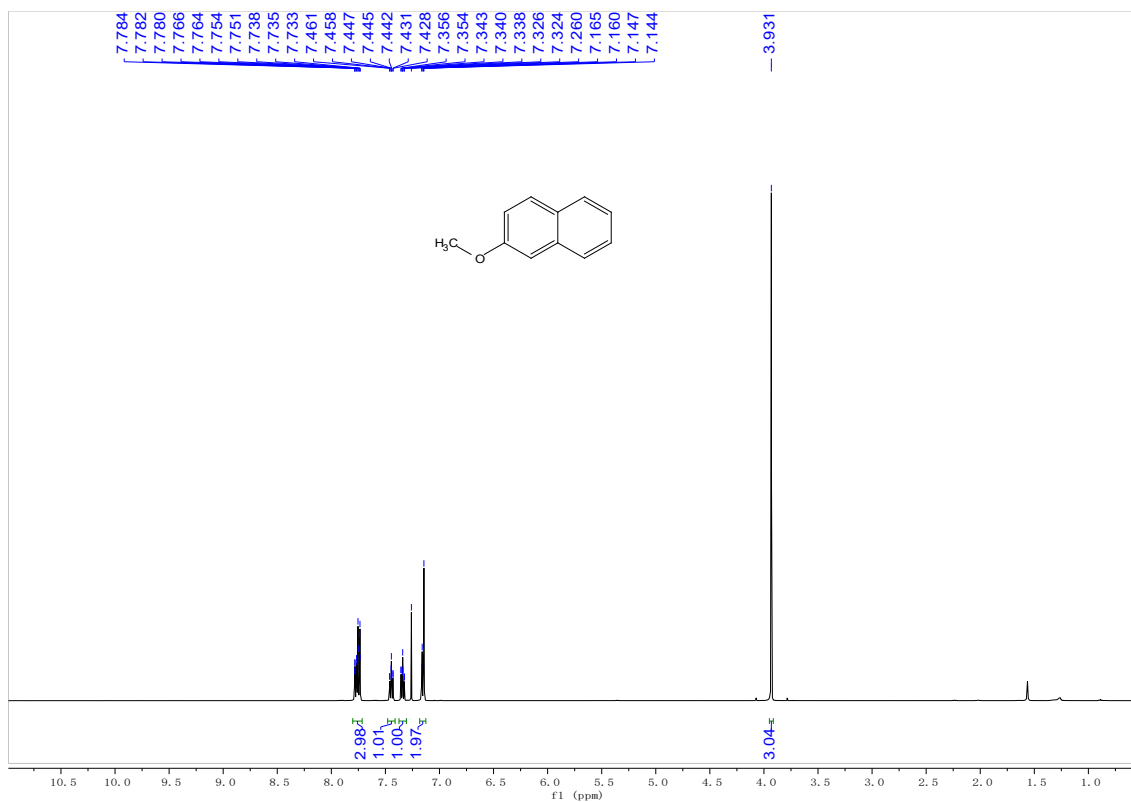

$^{13}\text{C}$  NMR (125 MHz,  $\text{CDCl}_3$ ) spectrum of compound **2w**

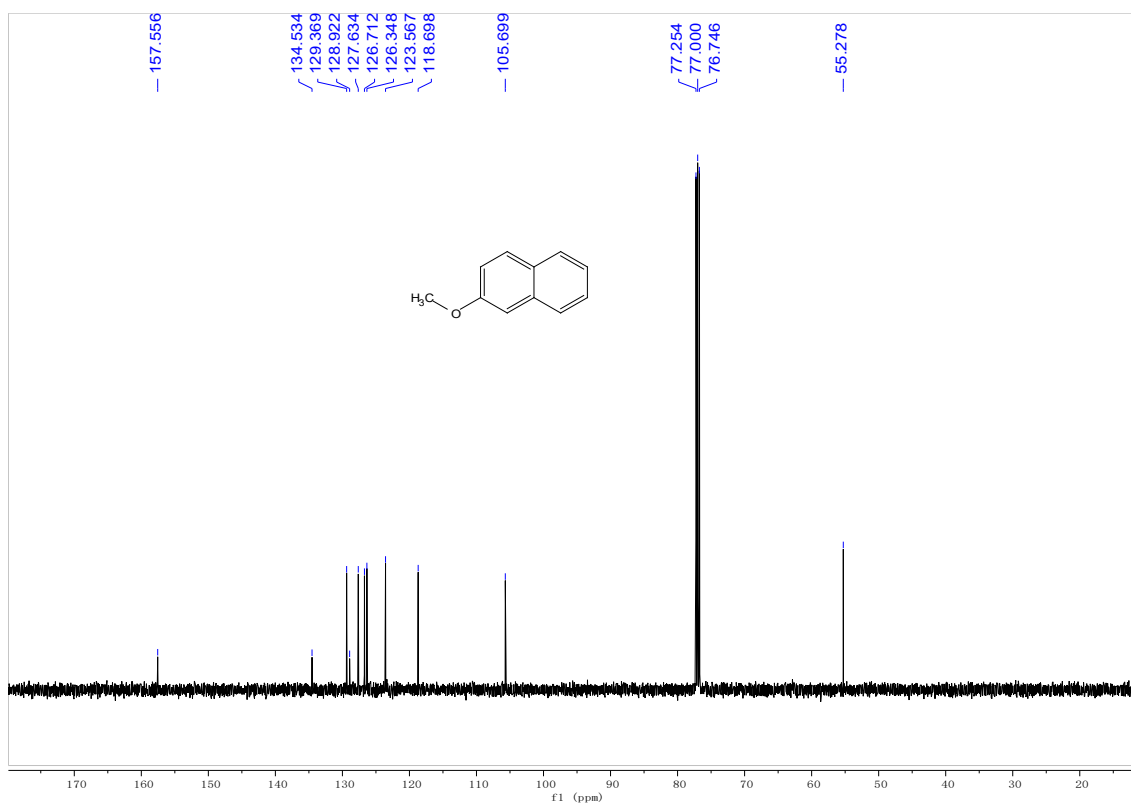



$^1\text{H}$  NMR (500 MHz,  $\text{CDCl}_3$ ) spectrum of compound **2x**

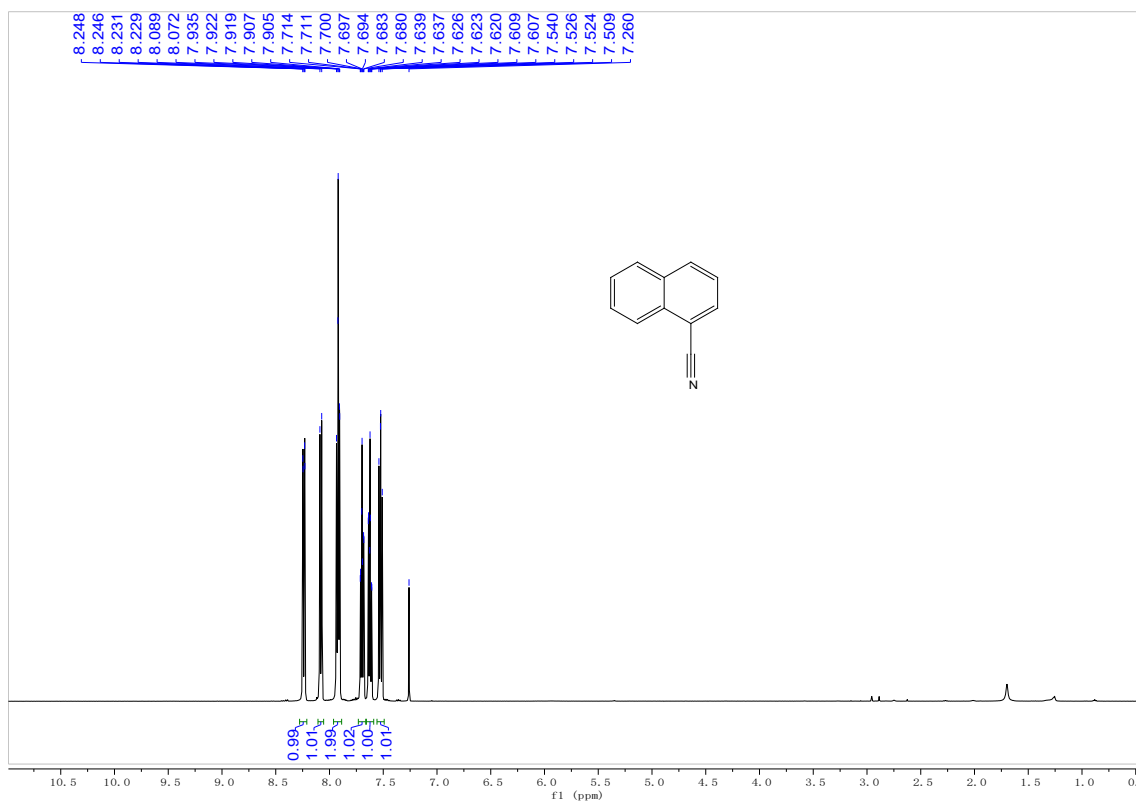

$^{13}\text{C}$  NMR (125 MHz,  $\text{CDCl}_3$ ) spectrum of compound **2x**

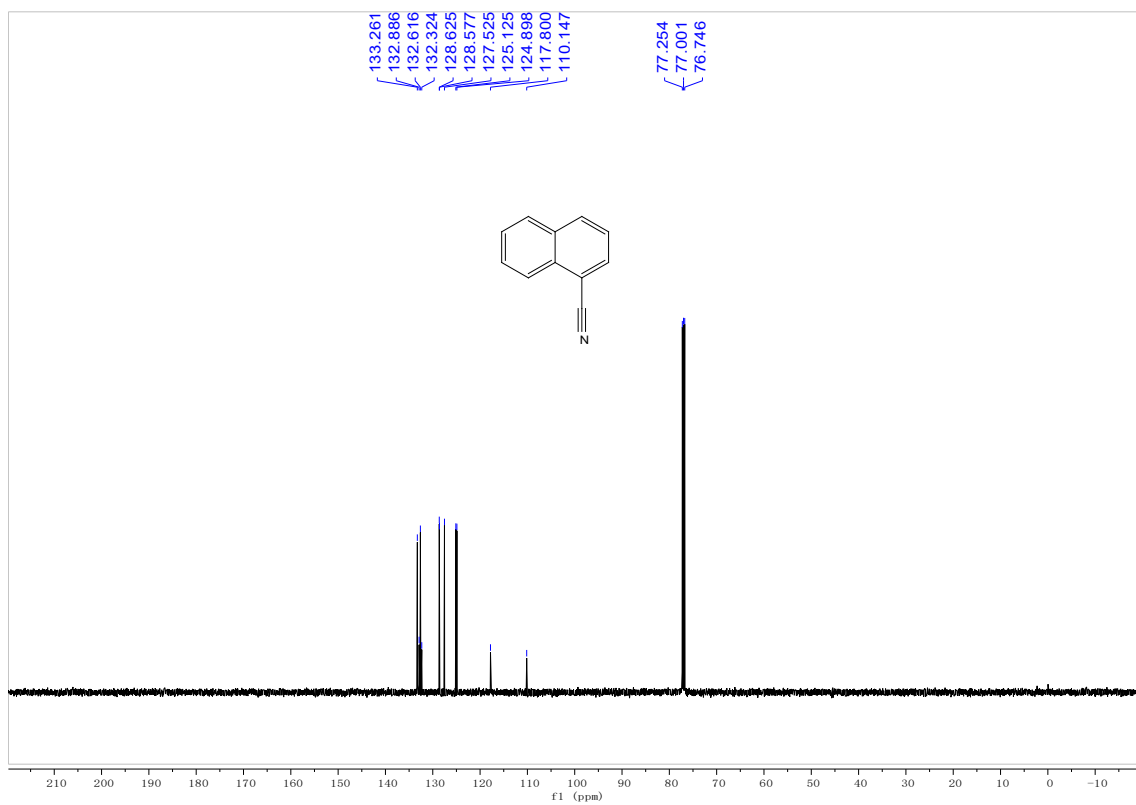

<sup>1</sup>H NMR (500 MHz, CDCl<sub>3</sub>) spectrum of compound **2y**

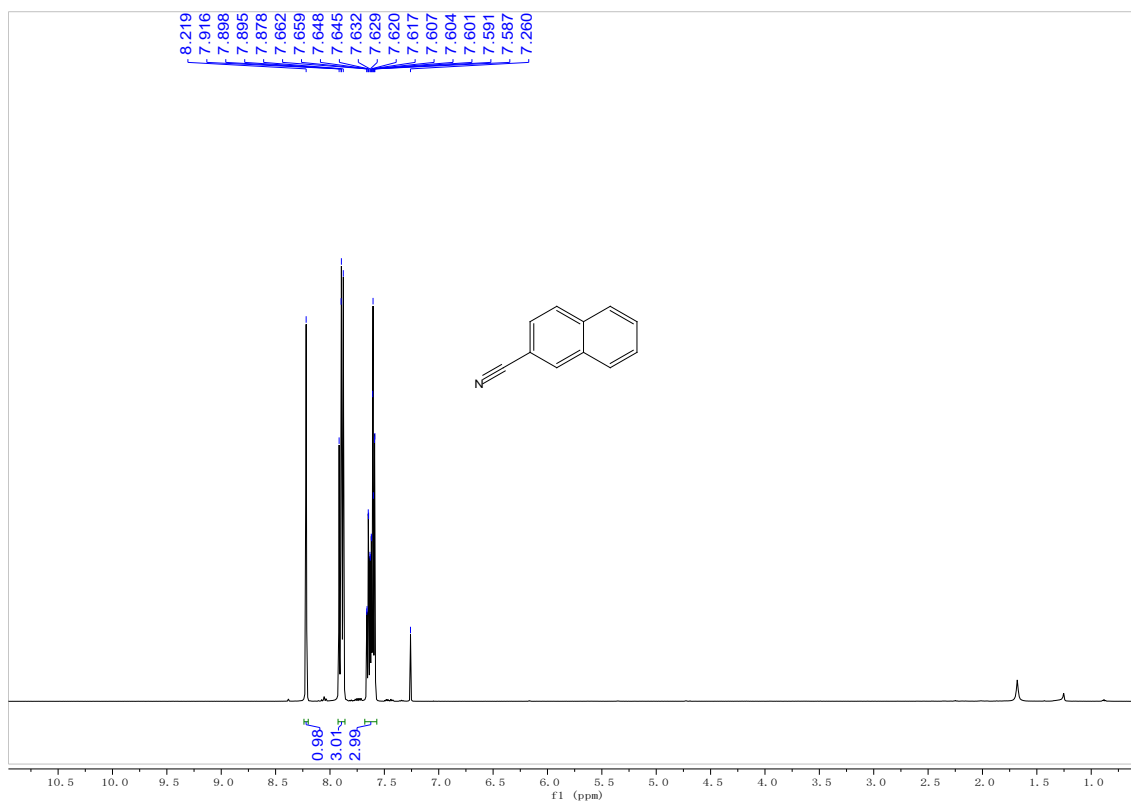

<sup>13</sup>C NMR (125 MHz, CDCl<sub>3</sub>) spectrum of compound **2y**

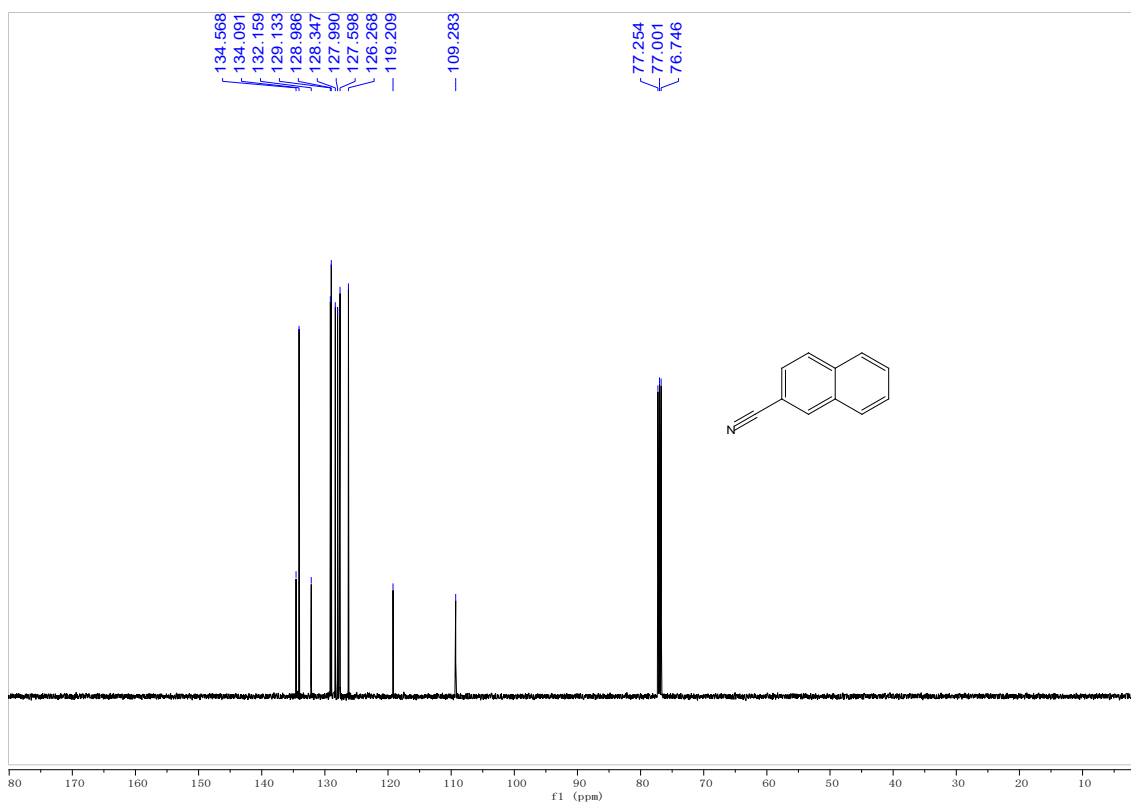

$^1\text{H}$  NMR (500 MHz,  $\text{CDCl}_3$ ) spectrum of compound **2z**

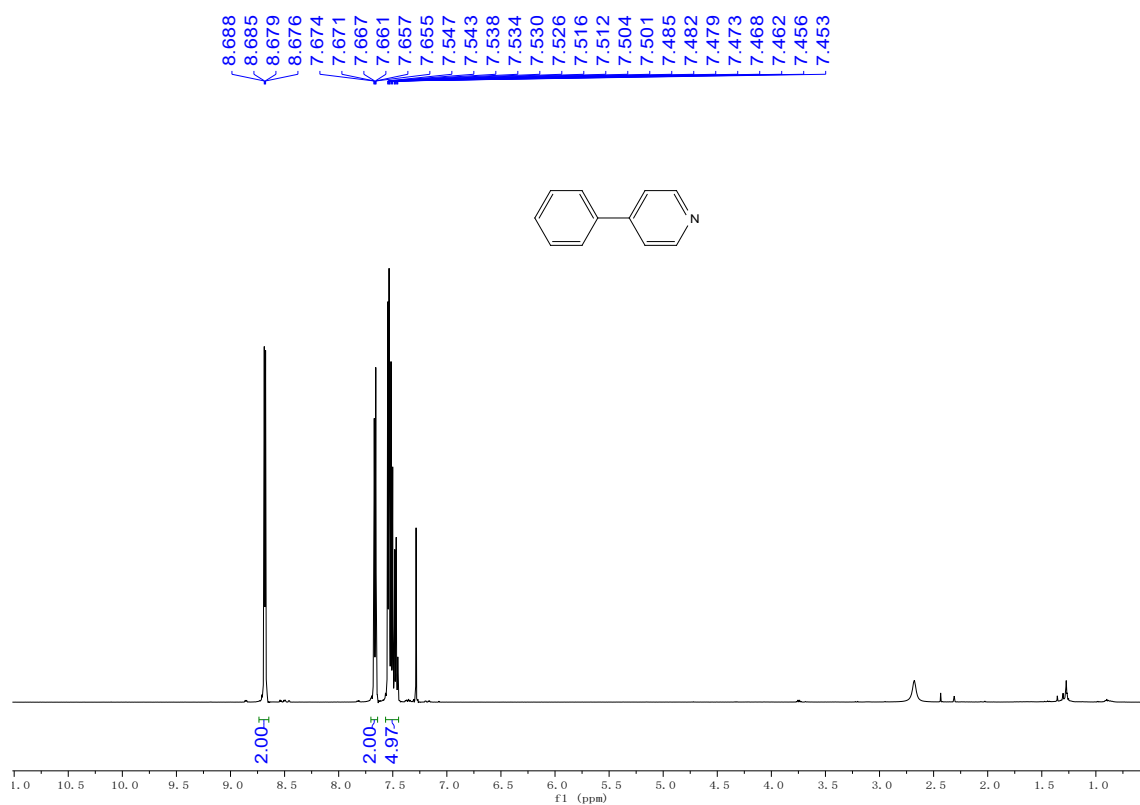

$^{13}\text{C}$  NMR (125 MHz,  $\text{CDCl}_3$ ) spectrum of compound **2z**

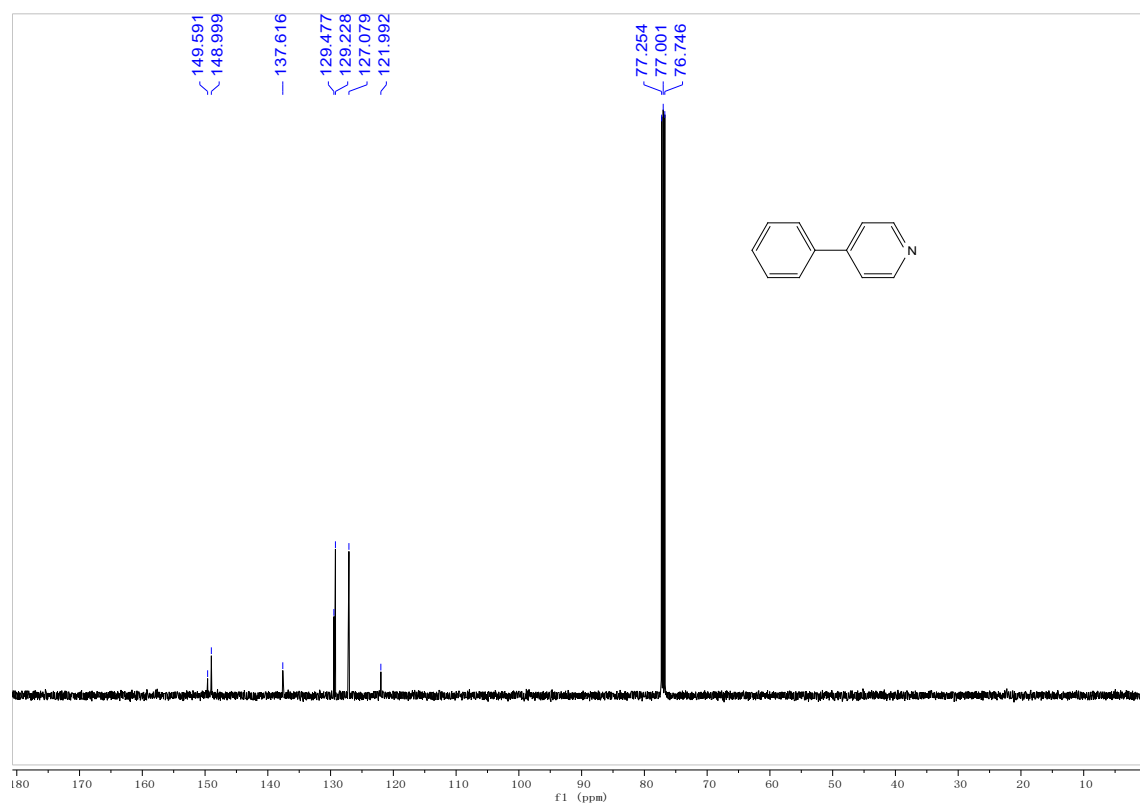

$^1\text{H}$  NMR (500 MHz,  $\text{CDCl}_3$ ) spectrum of compound **2aa**

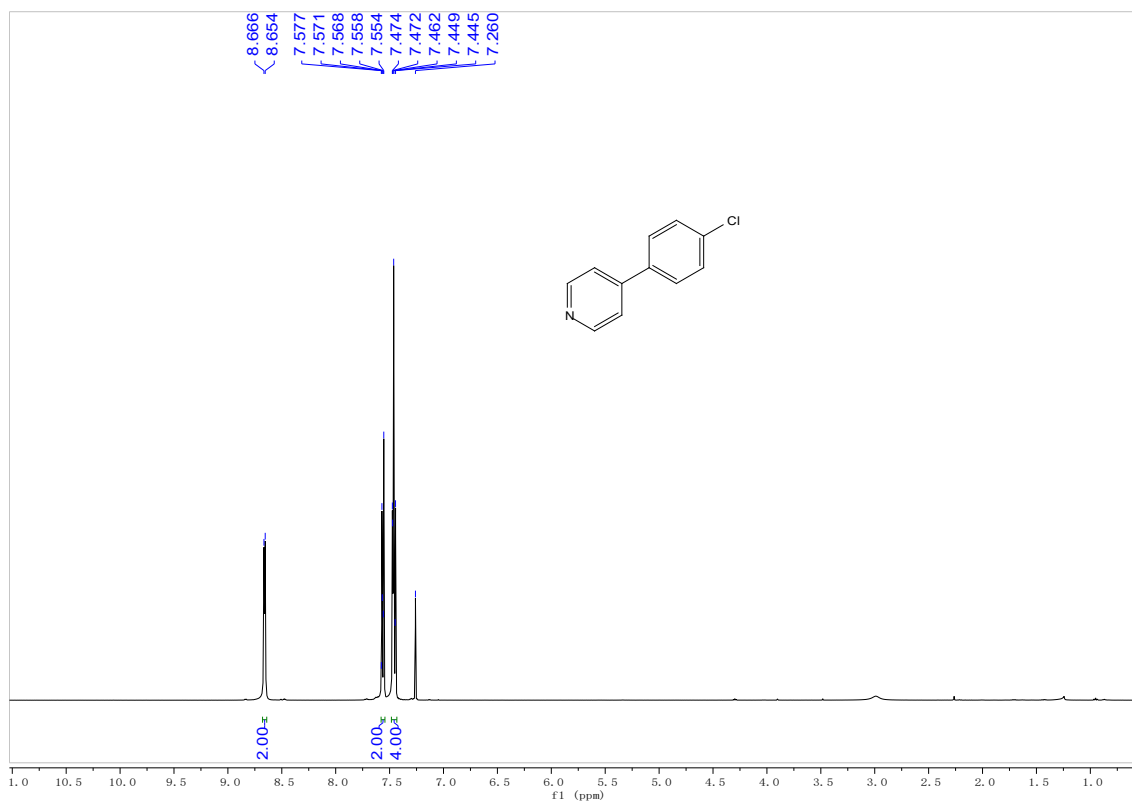

$^{13}\text{C}$  NMR (125 MHz,  $\text{CDCl}_3$ ) spectrum of compound **2aa**

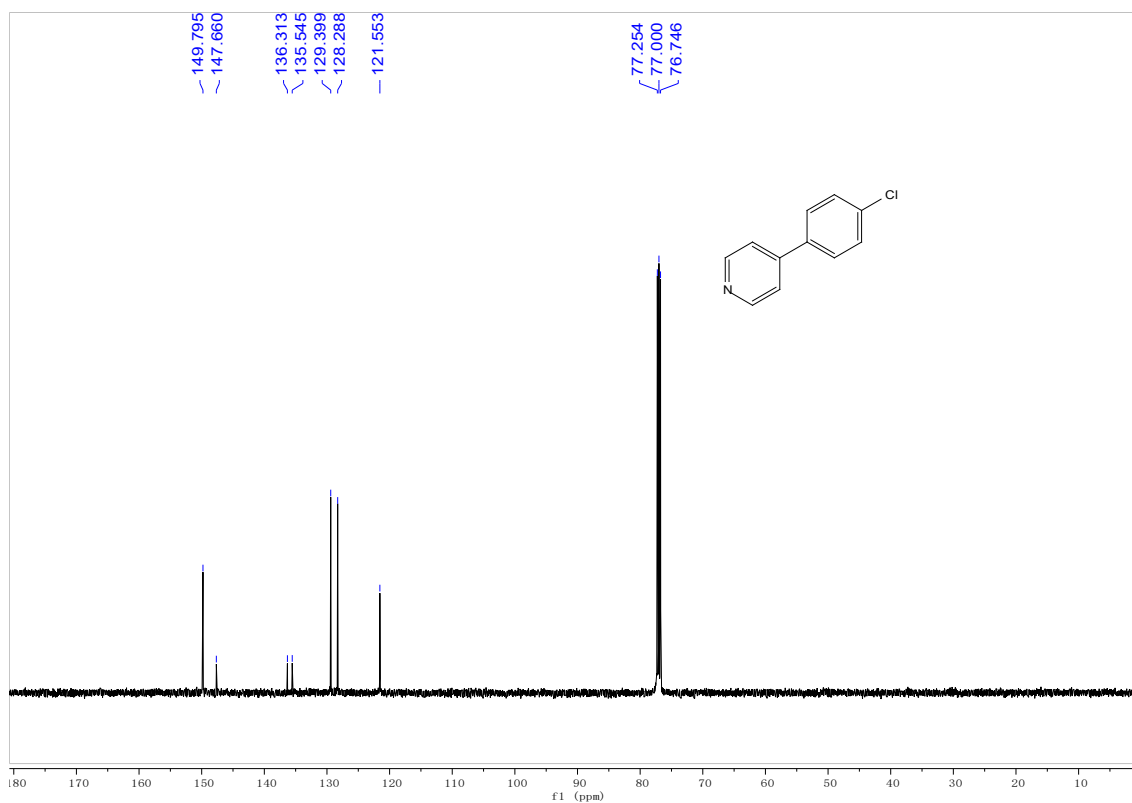

<sup>1</sup>H NMR (500 MHz, CDCl<sub>3</sub>) spectrum of compound **2ab**

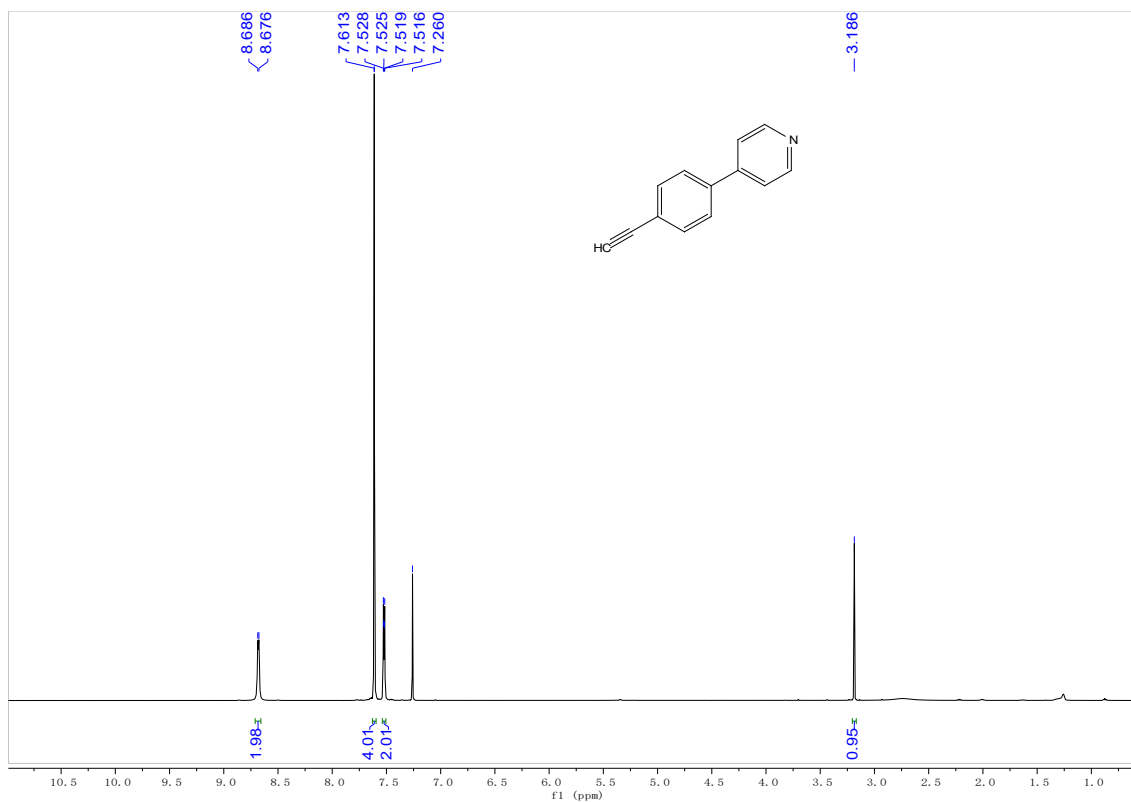

<sup>13</sup>C NMR (125 MHz, CDCl<sub>3</sub>) spectrum of compound **2ab**

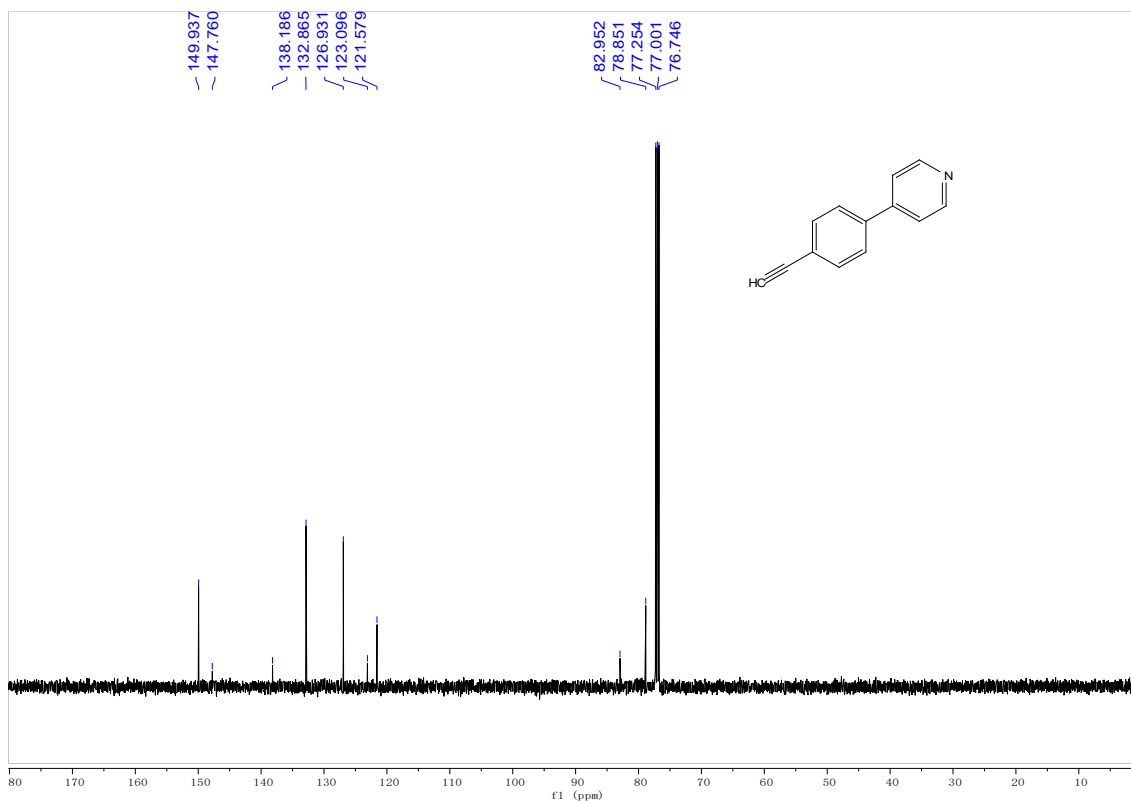

$^1\text{H}$  NMR (500 MHz,  $\text{CDCl}_3$ ) spectrum of compound **2ac**

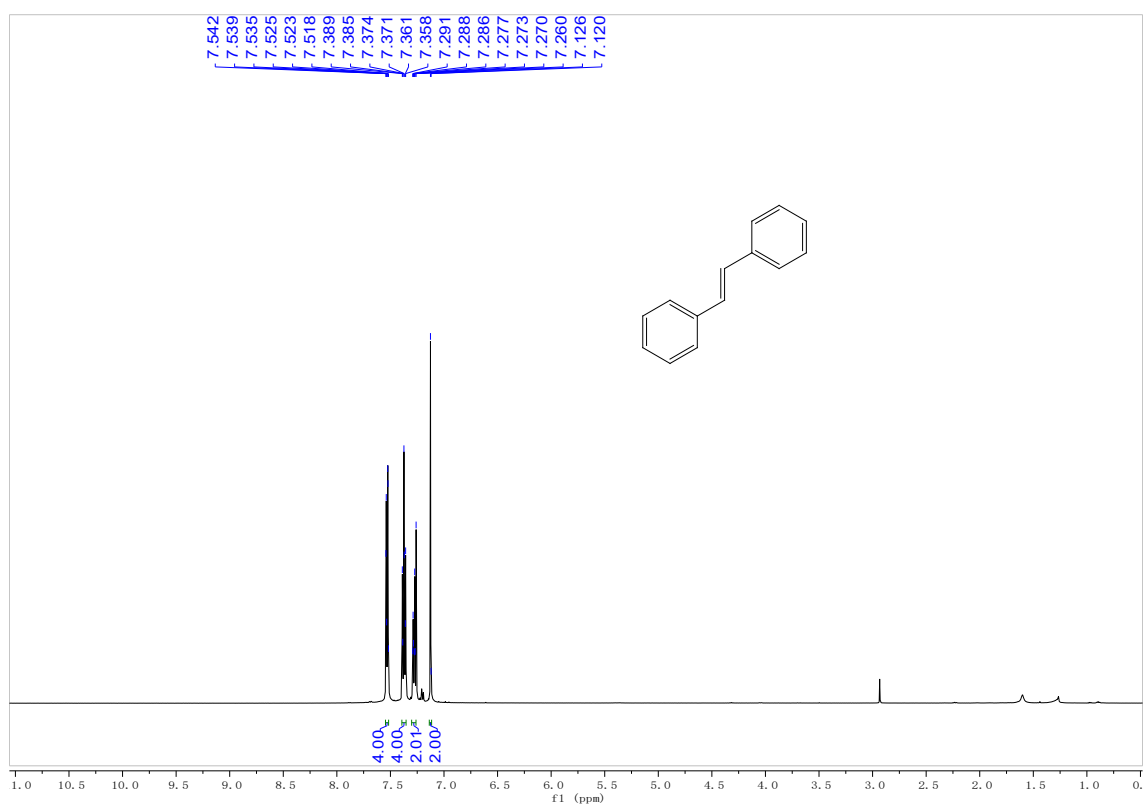

$^{13}\text{C}$  NMR (125 MHz,  $\text{CDCl}_3$ ) spectrum of compound **2ac**

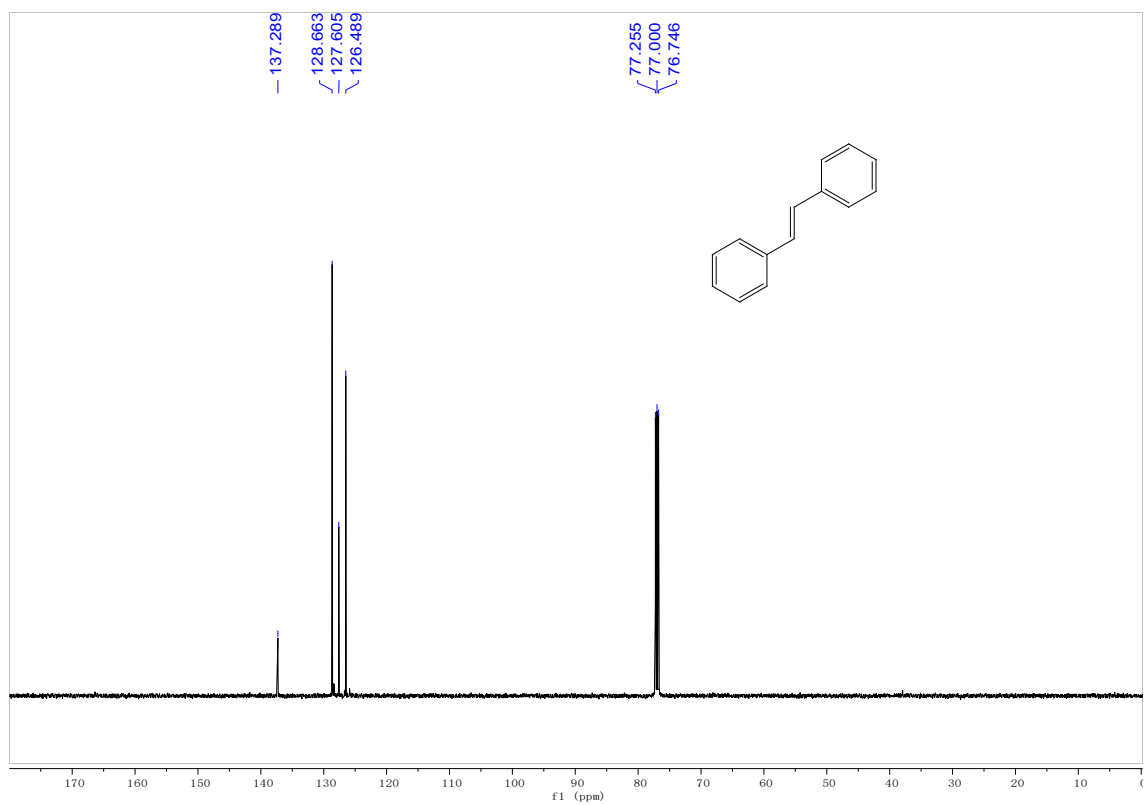

<sup>1</sup>H NMR (500 MHz, CDCl<sub>3</sub>) spectrum of compound **2ad**

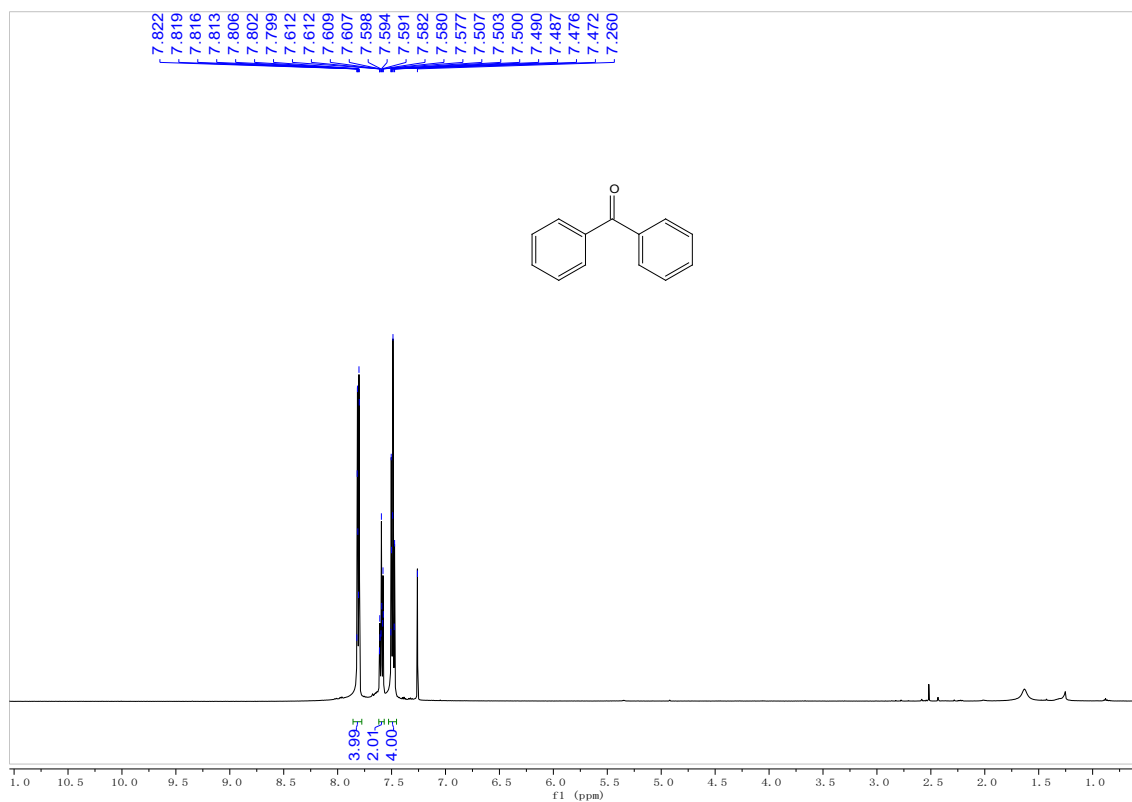

<sup>13</sup>C NMR (125 MHz, CDCl<sub>3</sub>) spectrum of compound **2ad**

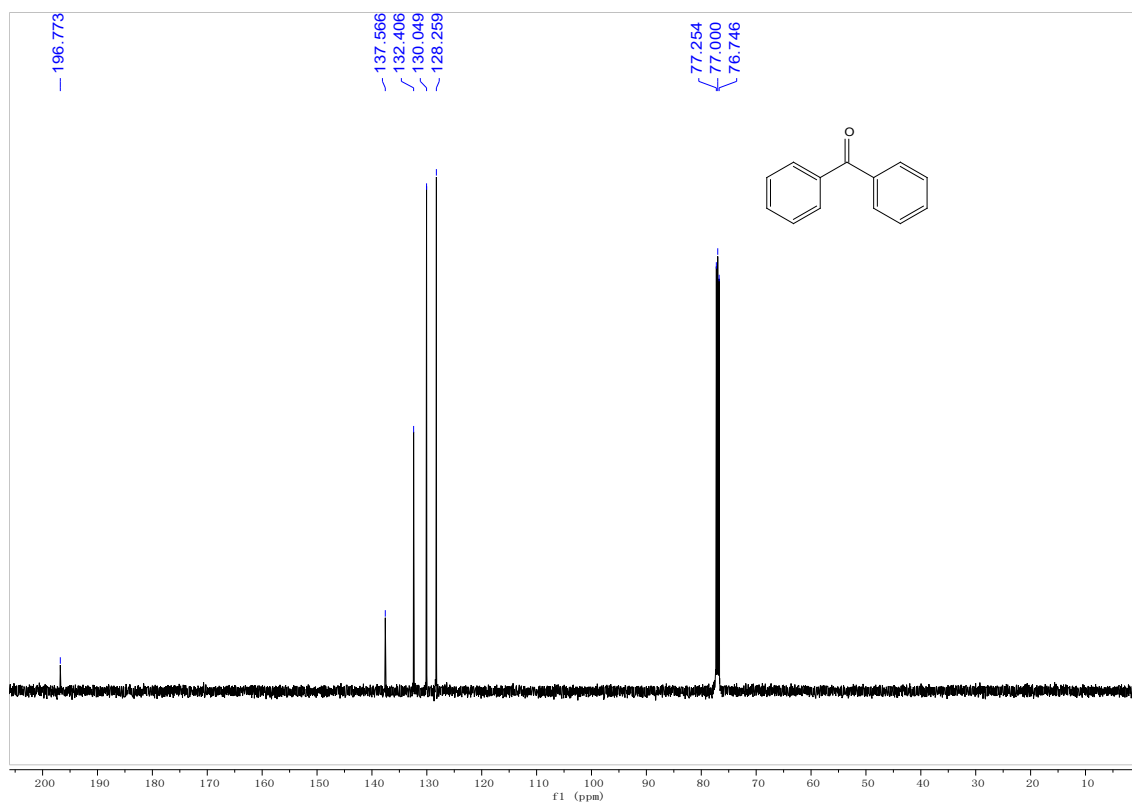

$^1\text{H}$  NMR (500 MHz,  $\text{CDCl}_3$ ) spectrum of compound **2ae**

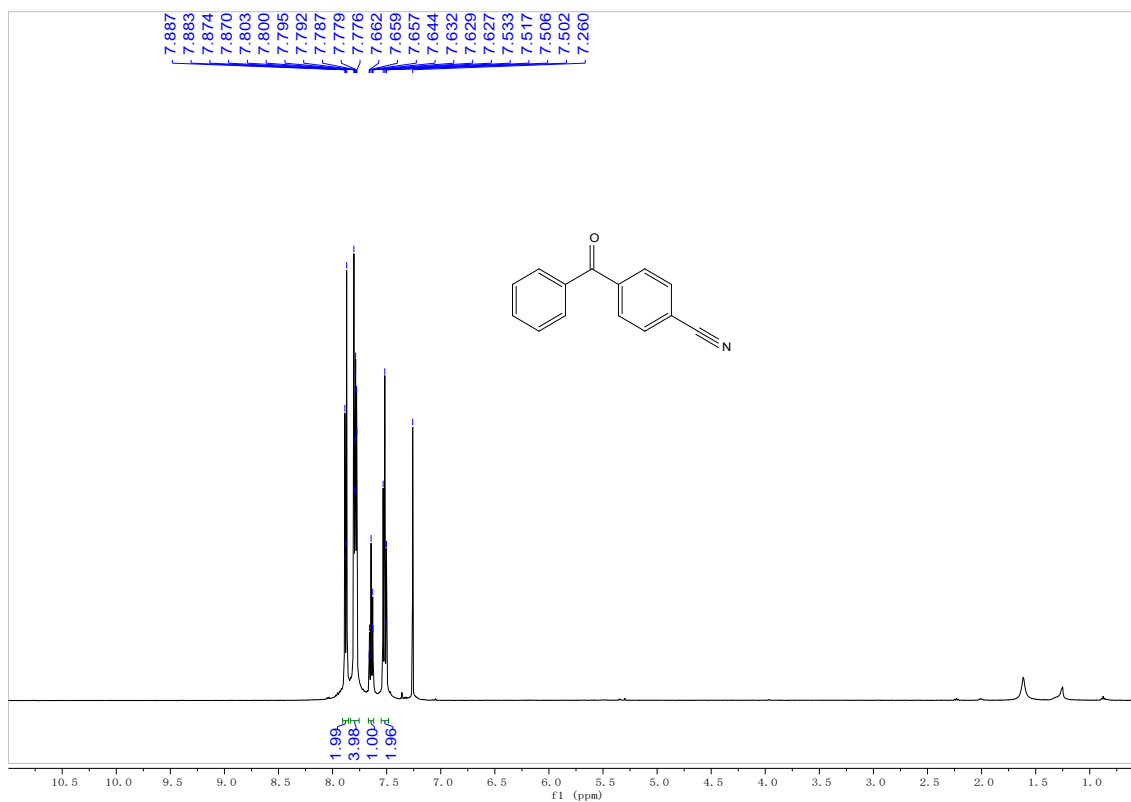

$^{13}\text{C}$  NMR (125 MHz,  $\text{CDCl}_3$ ) spectrum of compound **2ae**

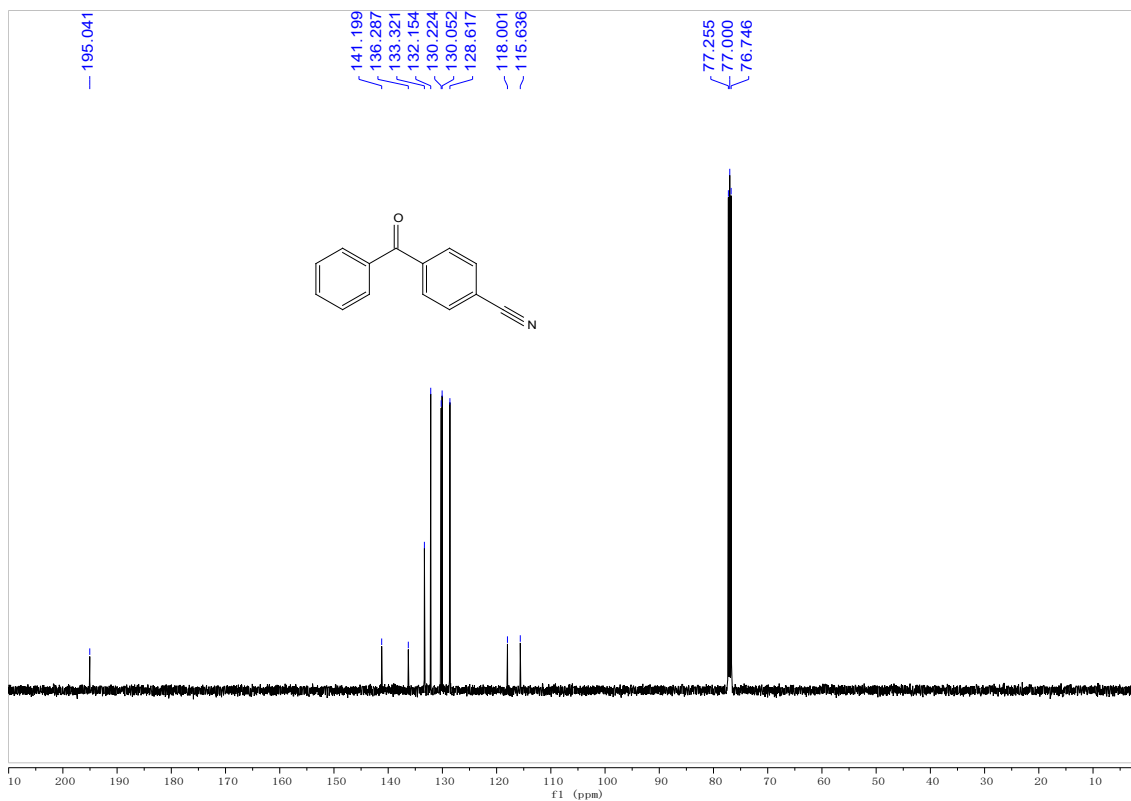



$^1\text{H}$  NMR (500 MHz,  $\text{CDCl}_3$ ) spectrum of compound **2af**

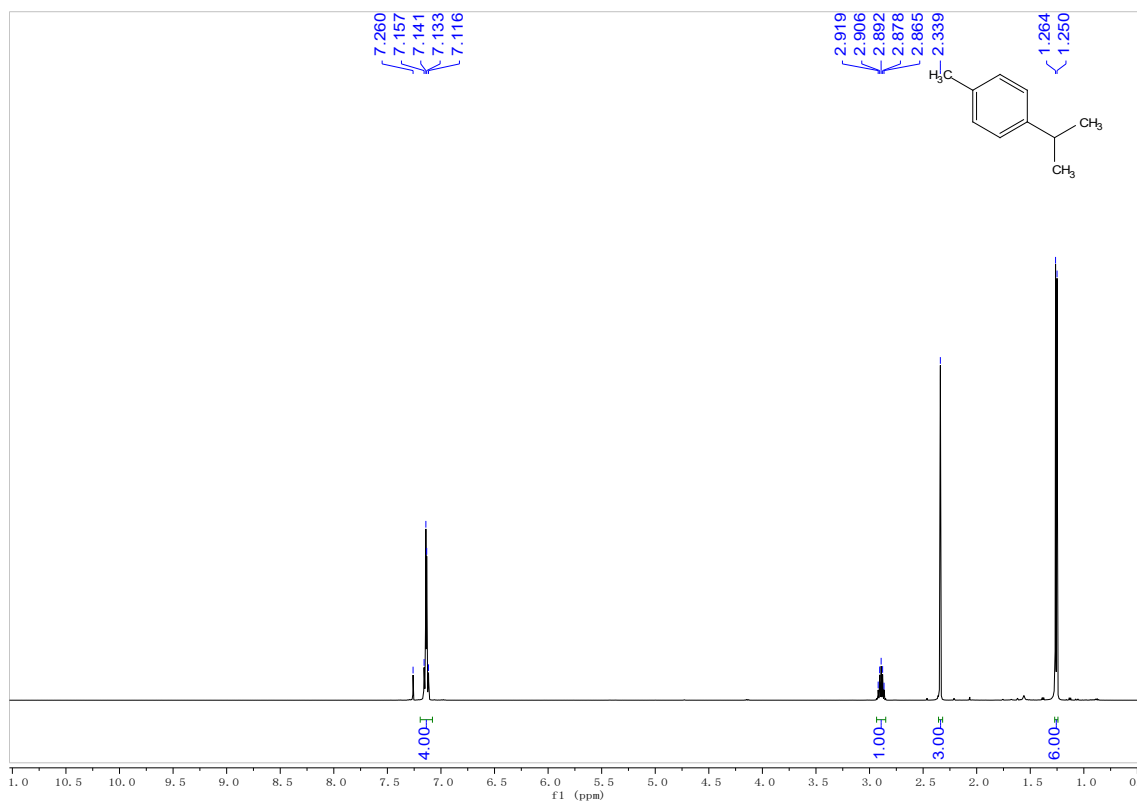

$^{13}\text{C}$  NMR (125 MHz,  $\text{CDCl}_3$ ) spectrum of compound **2af**

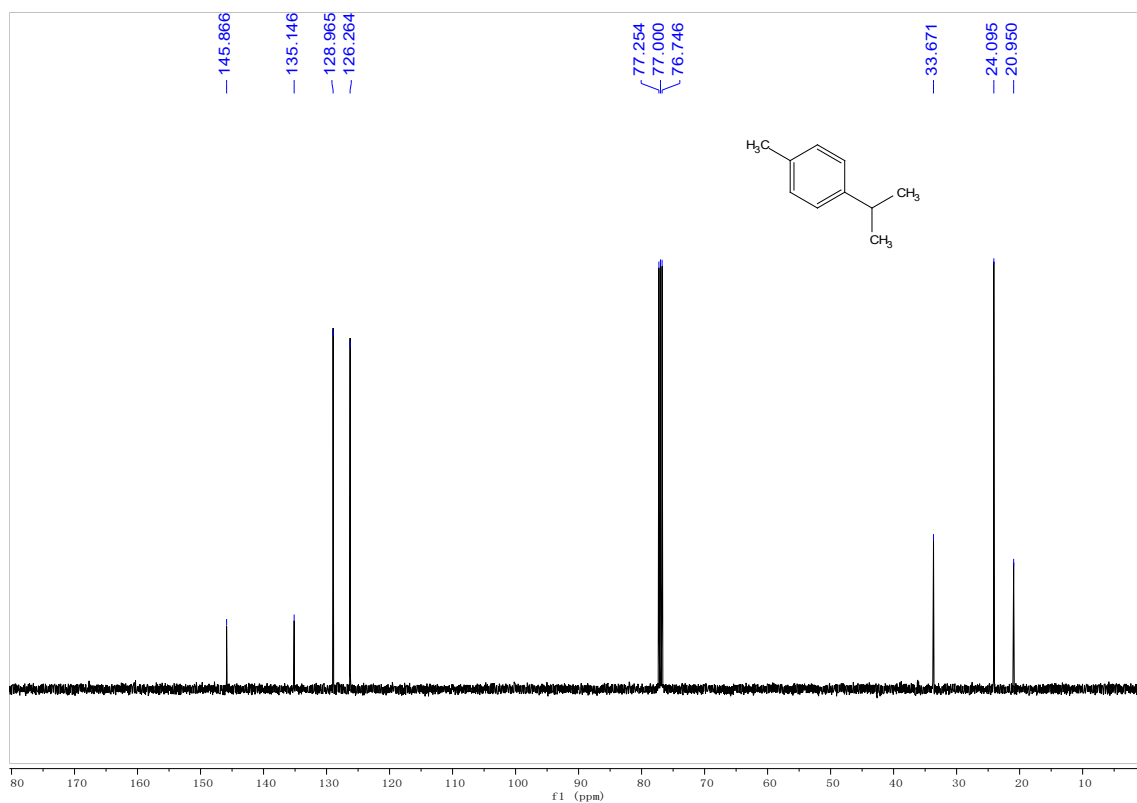

$^1\text{H}$  NMR (500 MHz,  $\text{CDCl}_3$ ) spectrum of compound **2ag**

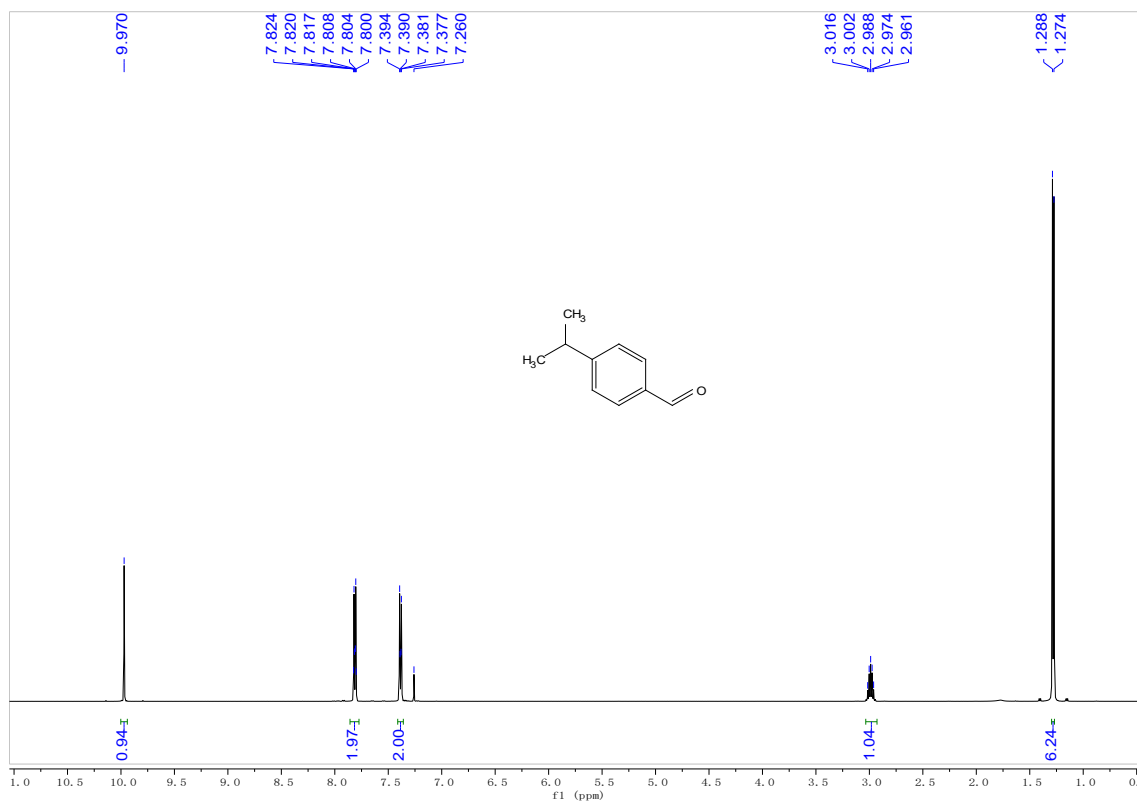

$^{13}\text{C}$  NMR (125 MHz,  $\text{CDCl}_3$ ) spectrum of compound **2ag**

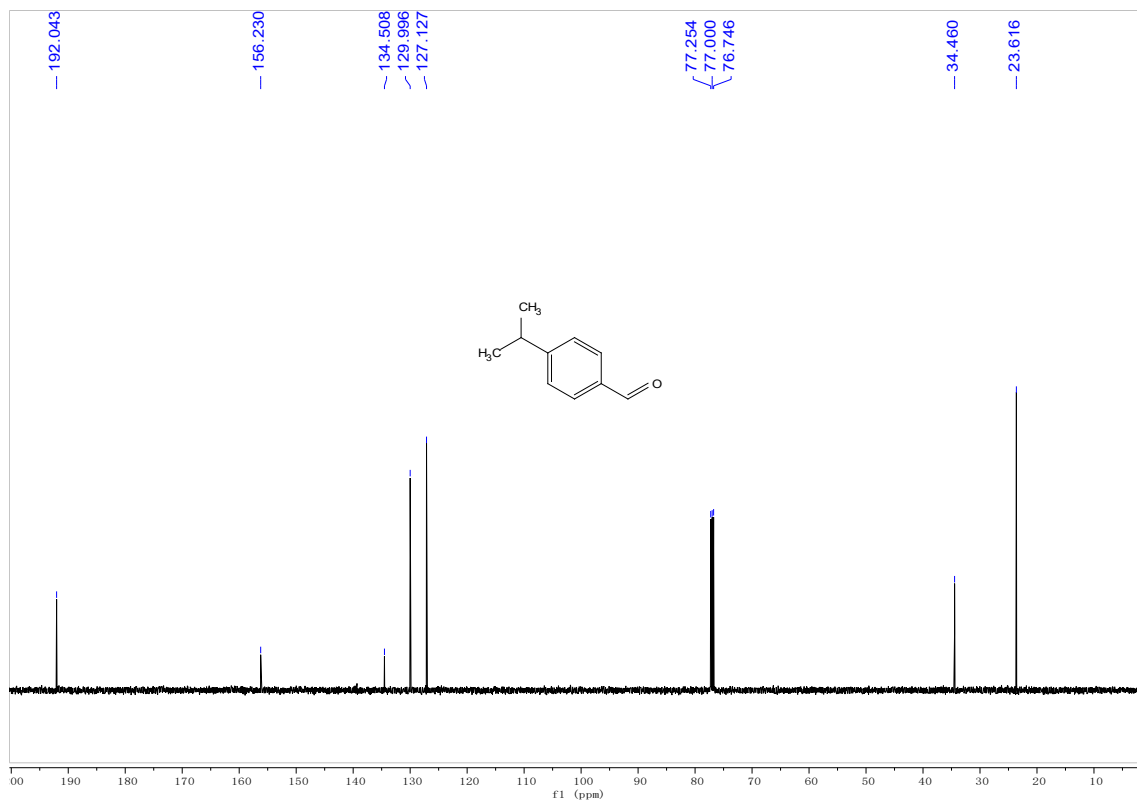

$^1\text{H}$  NMR (500 MHz,  $\text{CDCl}_3$ ) spectrum of compound **2ah**

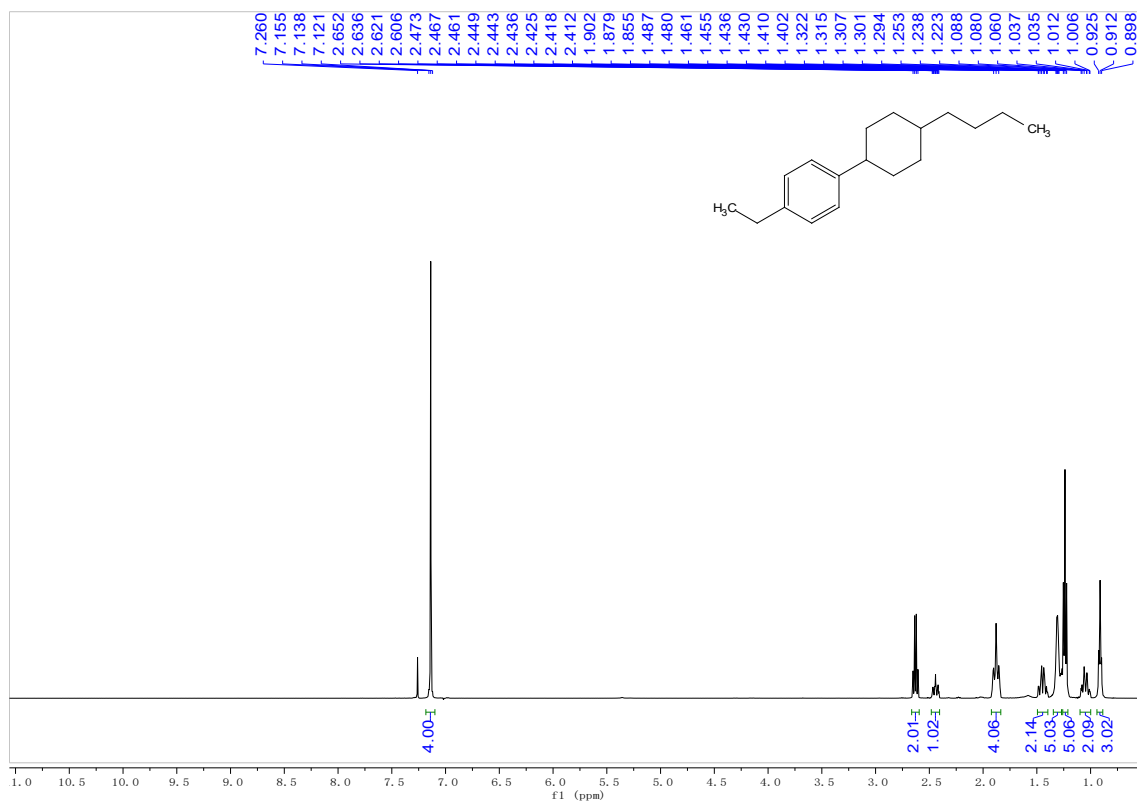

$^{13}\text{C}$  NMR (125 MHz,  $\text{CDCl}_3$ ) spectrum of compound **2ah**

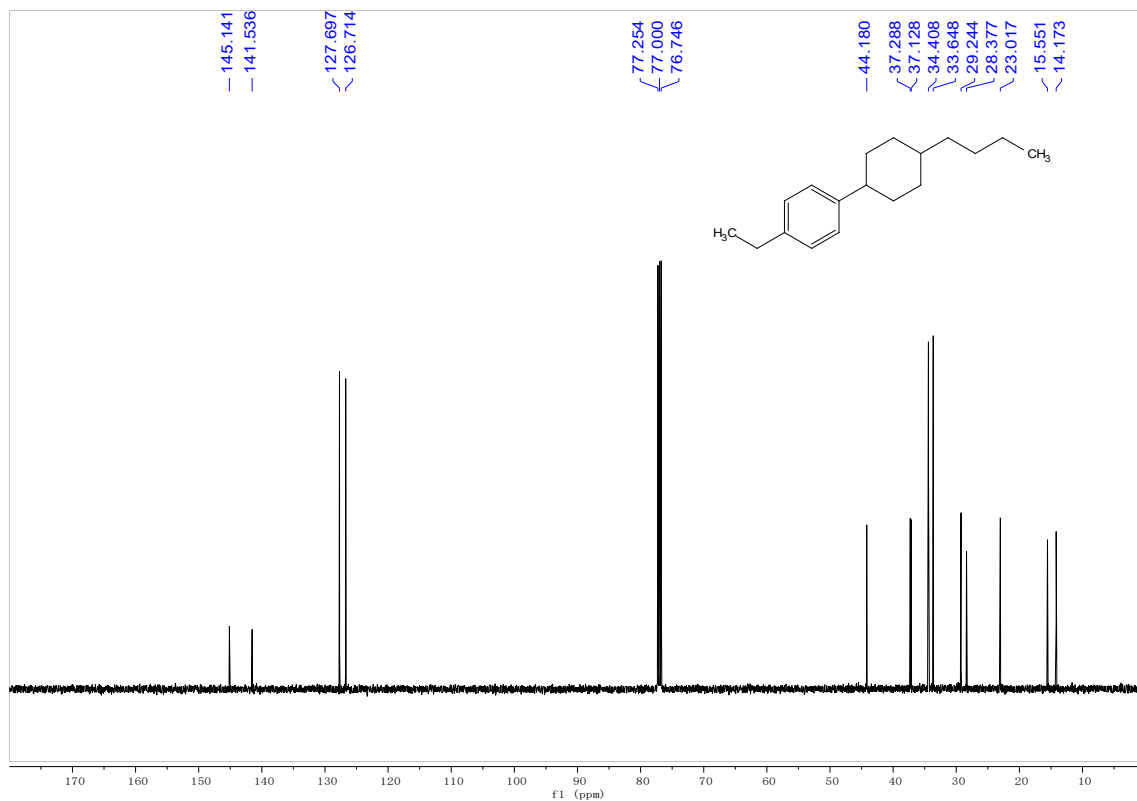

<sup>1</sup>H NMR (500 MHz, CDCl<sub>3</sub>) spectrum of compound 4a

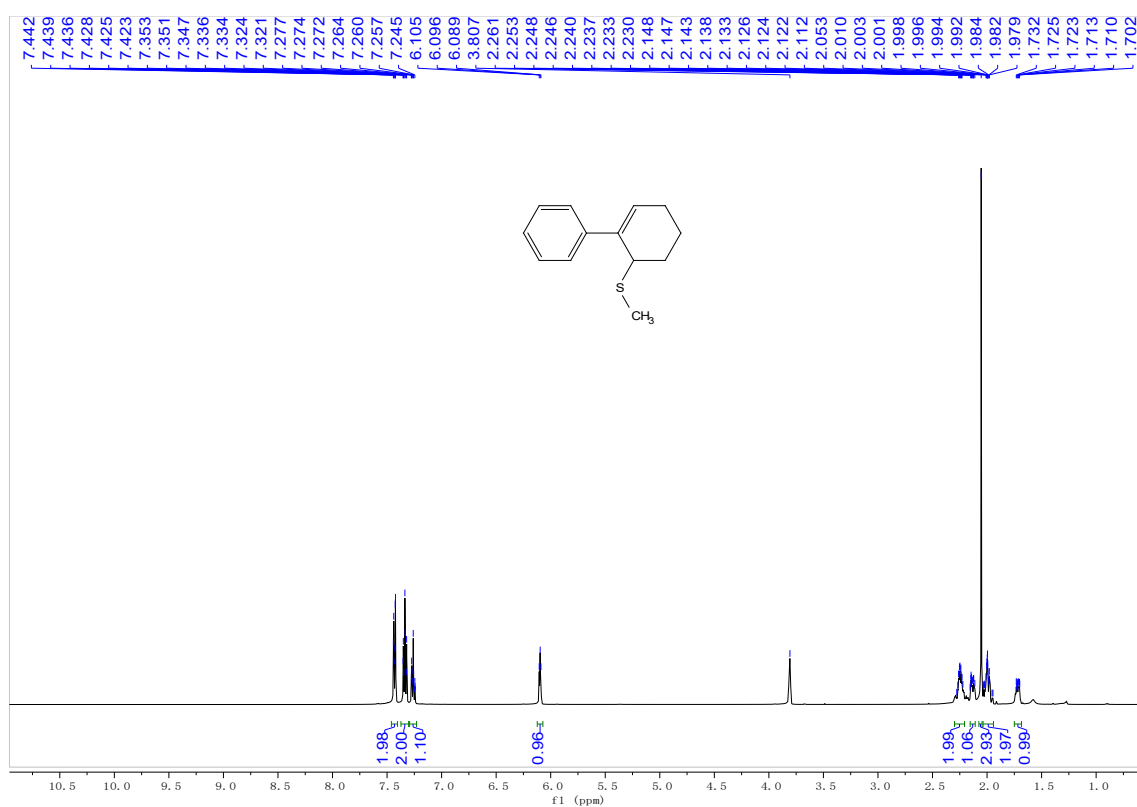

<sup>13</sup>C NMR (125 MHz, CDCl<sub>3</sub>) spectrum of compound 4a

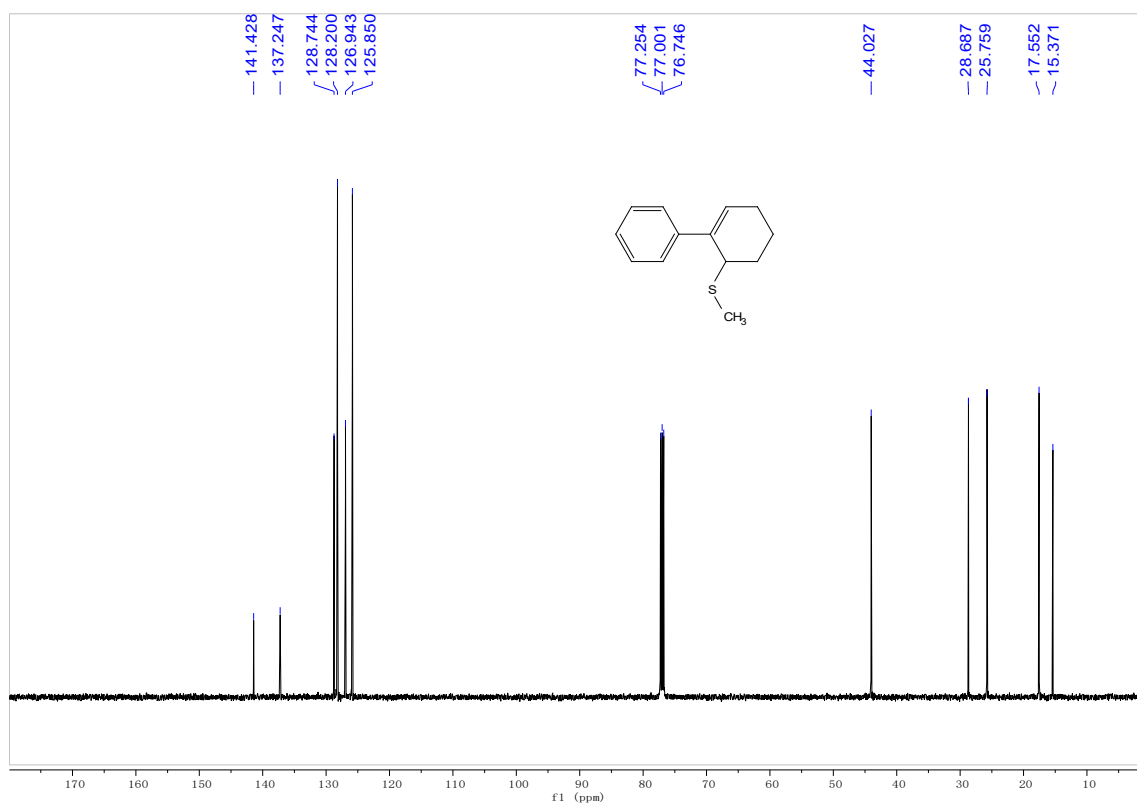

<sup>1</sup>H NMR (500 MHz, CDCl<sub>3</sub>) spectrum of compound **4b**

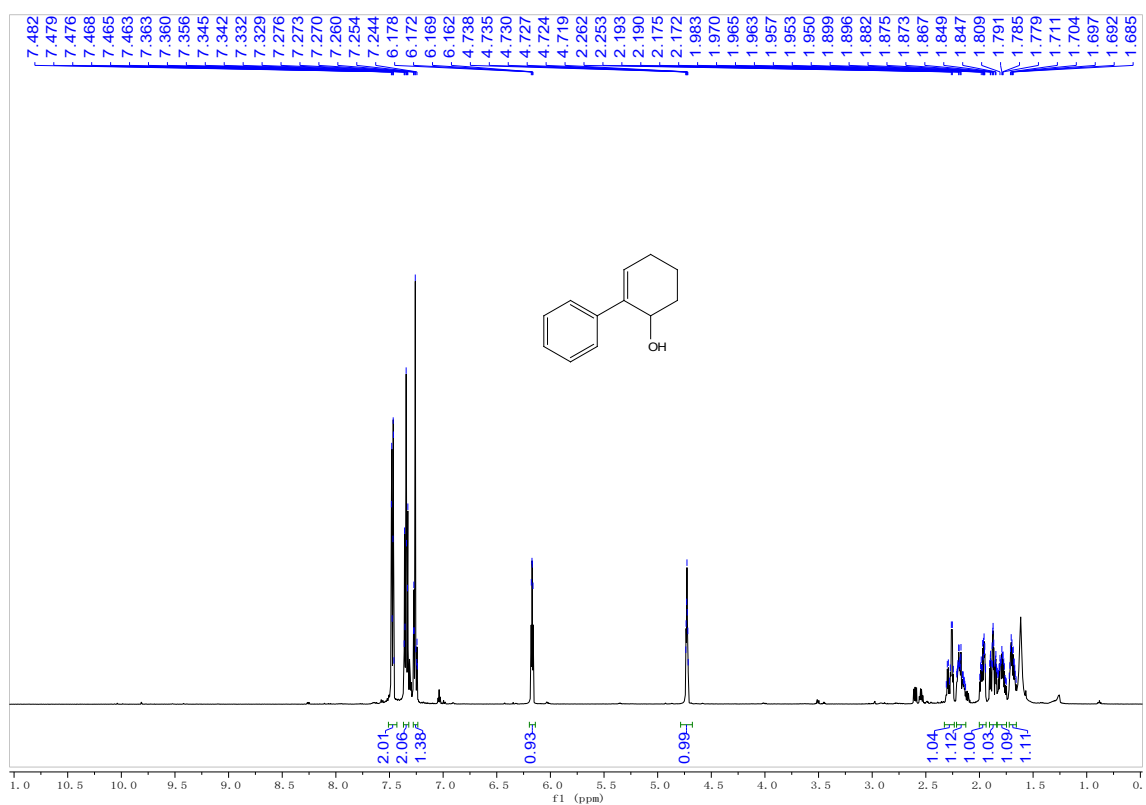

<sup>13</sup>C NMR (125 MHz, CDCl<sub>3</sub>) spectrum of compound **4b**

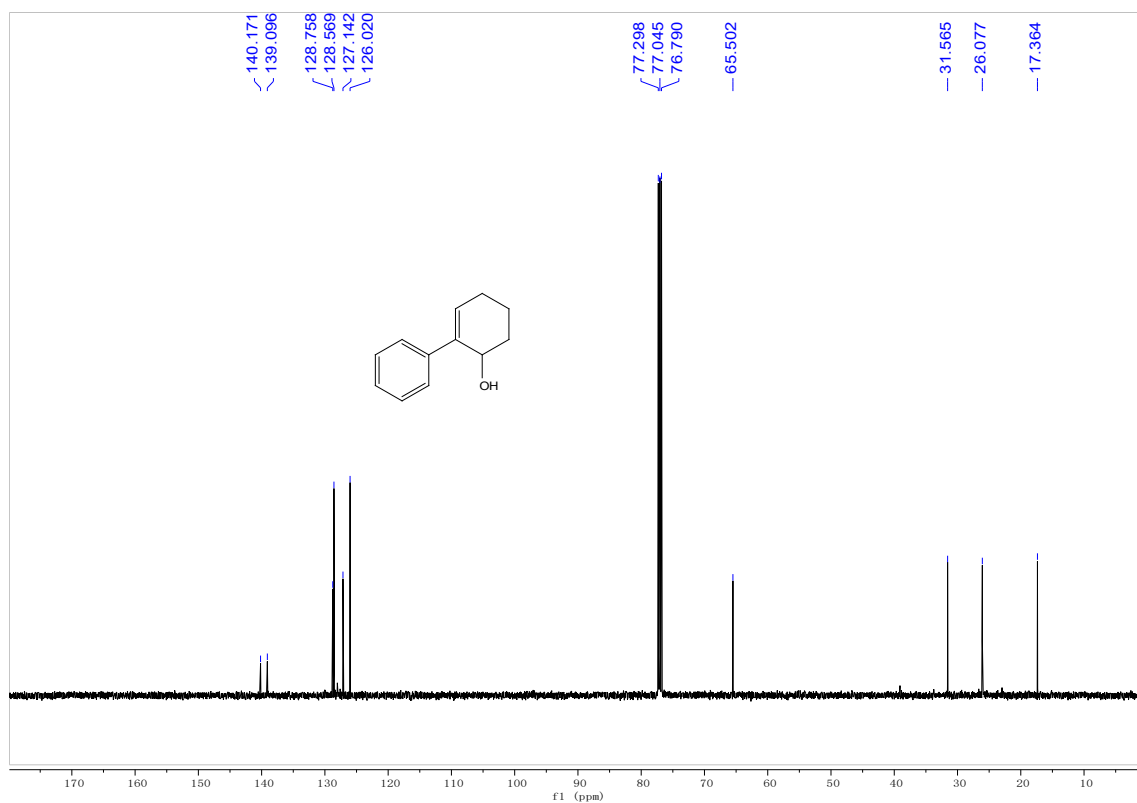

Supplement: d3cc03279e1.pdf [file d3cc03279e1.pdf]
